1 **Annelid brain and nerve cord in siboglinid *Riftia pachyptila***

2

3

4 Nadezhda N. Rimskaya-Korsakova<sup>1\*</sup>, Sergey V. Galkin<sup>2</sup>, Vladimir V. Malakhov<sup>1, 3</sup>

5

6

7 <sup>1</sup>Department of Invertebrate Zoology, Faculty of Biology, Lomonosov Moscow State  
8 University, Moscow, Russia

9 <sup>2</sup>Laboratory of Ocean Benthic Fauna, Shirshov Institute of Oceanology of the Russian  
10 Academy of Science, Moscow, Russia

11 <sup>3</sup>Far Eastern Federal University, Vladivostok, Russia

12

13

14 \*Corresponding author

15 E-mail: [nadezdakorsakova@gmail.com](mailto:nadezdakorsakova@gmail.com) (NNRK)

16

## 17 **Abstract**

18 Vestimentifera is a peculiar group of marine gutless siboglinids which has uncertain  
19 position in annelid tree. The detailed study of the fragmentary explored central nervous  
20 system of vestimentiferans and other siboglinids is requested to trace the evolution of  
21 the siboglinid group. Among all siboglinids the vestimentiferans preserve the gut  
22 rudiment what makes them a key group to homologize main cerebral structures with the  
23 ones of typical annelids, such as supra- and subesophageal commissures,  
24 cirsumesophageal connectives etc. Histologically we revealed main annelid brain  
25 structures in the compact large brain of *Riftia pachyptila*: cirsumesophageal connectives  
26 (longitudinal nerve tracts) and commissures (dorsal, supra- and subenteral  
27 commissures). Innervation of tentacles makes them homologous to peristomial palps of  
28 the rest annelids. The single nerve cord is represented by paired intraepidermal  
29 longitudinal strands associated with the ventral ciliary field in vestimentum and bearing  
30 giant axons originating from at least four pairs of perikarya. The absence of regularly  
31 positioned ganglia and lateral nerves in the nerve cord in vestimentum and trunk and  
32 presence of them in the opisthosome segments. Among siboglinids, the  
33 vestimentiferans distinguished by a large and significantly differentiated brain which is  
34 reflection of the high development of the palp apparatus. *Osedax*, frenulates and  
35 *Sclerolinum* have less developed brain. Frenulates and *Sclerolinum* have good  
36 ganglionization in the opisthosome, which probably indicates its high mobility.  
37 Comparative neuroanatomical analysis of the siboglinids and annelid sister clades  
38 allows us to hypothesize that the last common ancestor of siboglinids might had brain  
39 with a dorsal commissure giving rise neurite bundles to palps and paired ventral nerve  
40 cord.

41

## 42 Introduction

43 Vestimentifera is a peculiar group of marine gutless annelids inhabiting mainly areas of  
44 hydrothermal vents and hydrocarbon seeps [1–3]. The first anatomical details of the  
45 nervous system of Vestimentifera was made in the description of the first discovered  
46 vestimentiferan *Lamellibrachia barhami* [4]. Later on, nervous system was studied in *L.*  
47 *luymesii* [5,6], *Riftia pachyptila* [7–9], *Ridgeia piscesae* [10], *Oasisia alvinae* [11], *L.*  
48 *satsuma* [12]. By means of light microscopy and histology it was shown the presence of  
49 the ventral nerve cords and positions of perikarya and neuropile in brain of larval  
50 [13,14] and adult vestimentiferans [6,9–12,15]. Electron microscopical studies revealed  
51 presence of the sensory cells and glial cells structuring neuropile, and form a myelin  
52 sheath around the giant axons [9]. In adult vestimentiferans the brain occupies an  
53 unusual for annelids antero-ventral position. Jones and Gardiner [13] found that in  
54 juveniles the rudiment of the brain is laid in the base on the dorsal side of the oral  
55 siphon. After the reduction of the oral siphon, the brain rudiment shifts to the antero-  
56 ventral position. Jones and Gardiner [8] suggested that the brain of vestimentiferans is a  
57 result of the fusion of the supra- and subesophageal ganglia and the circumesophageal  
58 connectives. Based on the fact that a coelomic channel passes through the brain in  
59 which the rudimentary intestine remains in young individuals, this assumption seems  
60 very likely. However, it needs to be confirmed by a more detailed comparison of the  
61 intracerebral structures of vestimentiferans and more typical annelids.

62 Vestimentiferan tubeworms together with Frenulata [4], *Sclerolinum* [16] and *Osedax*  
63 [17] refer to annelid group Siboglinidae [18]. The nervous system of the  
64 vestimentiferans and the rest siboglinids was studied by various methods at the different  
65 levels of detalization what makes them difficult to compare. The architecture of  
66 frenulates' central nervous system is known based on histological and histochemical  
67 studies of the ventral nerve cords and rings and brain area of early branched species

68 *Siboglinum caulleryi*, *S. fiordicum* and *Nereilinum murmanicum*, and derived ones as  
69 *Polybrachia annulata*, *Spirobrachia grandis* [18–24]. Electron microscopy revealed  
70 presence of glial and sensory elements in epidermis of frenulates [25]. Structure of  
71 central nervous system of females and dwarf males of *Osedax* is described by means of  
72 immunohistochemistry combined with confocal microscopy that revealed numerous  
73 commissures and connectives in the brain and trunk nervous system [26,27]. Semi-thin  
74 sectioning and light microscopy revealed in brain of *Sclerolinum contortum* the layers of  
75 apical perikarya and basal neuropile [28]. Precise ultrastructural neural studies on  
76 *Osedax* and *Sclerolinum* were not yet made. Thus, the degree of anatomical study of  
77 the organization of the nervous system of vestimentiferans and other siboglinids  
78 remains fragmentary and insufficient to make meaningful comparisons with the nervous  
79 system of annelids, to which siboglinids are close, according to phylogenetic data [29–  
80 34]. Detailed neural reconstructions by comparable methods of siboglinids are highly  
81 requested to identify key features and trace their neural evolution.

82 Phylogenetic position of Vestimentifera and the whole group Siboglinidae in the annelid  
83 system remains controversial. Various annelid sister groups have been proposed, e.g.  
84 Oweniidae [35,36], Sabellidae [31,37], Cirratuliformia [38,39], or Clitellata [40,41].  
85 Nervous system of the listed annelids is described by various authors [42–52], but there  
86 is still no attempts to reveal if there is any neural similarities among siboglinids and  
87 proposed sister groups of annelids.

88 Among all siboglinids the juvenile of vestimentiferans preserve the gut rudiment, so it is  
89 the key group to homologize the supra- and subesophageal brain parts of ventral brain  
90 of siboglinids with the typical annelid brains. Moreover, vestimentiferans are  
91 distinguished by their enormous sizes (*Riftia* reaches 1,5 m in length) what makes their  
92 histological studies very informative for 3D reconstructions. The main goal of the current  
93 work is to reconstruct organization of the central nervous system of vestimentiferan

94 tubeworm *Riftia pachyptila* with special accent to its brain structure. This data is  
 95 necessary for comparison of neuroanatomy of vestimentiferan tubeworms and sister  
 96 groups of annelids to find the possible ancestor features in the nervous system of  
 97 siboglinids.

98

## 99 **Materials and Methods**

### 100 **Collection and Fixation**

101 Five specimens of *Riftia pachyptila* Jones, 1981 [7] were collected at different latitudes  
 102 of the East Pacific Rise (EPR), including the Guaymas Basin, Gulf of California, by the  
 103 *Pisces* manned submersible during the 12th cruise of RV Akademik Mstislav Keldysh in  
 104 1986 and by *Mir-1* & 2 manned submersibles during its 49th cruises in 2003. Lengths of  
 105 examined specimens are from 8 to 808 mm. In Table 1 there is the data on collection  
 106 sites and sexes of specimens.

107 **Table 1. The studied specimens collected during cruises of the RV Akademik**  
 108 ***Mstislav Keldysh* (AMK).**

| specimens |          |            | collection sites                                     |          |                                                |
|-----------|----------|------------|------------------------------------------------------|----------|------------------------------------------------|
| #         | sex      | length, mm | name & coordinates                                   | depth, m | # station, ROV, year                           |
| 1         | juvenile | 8          | 9°N EPR:<br>09° 50,53' N, 104°17,51' W               | 2552     | AMK-4668, <i>Mir-1</i> ,<br>2003               |
| 2         | female   | 16         | <i>Guaymas Basin</i> :<br>27° 02,45' N, 111°22,80' W | 1990     | AMK-1519, <i>Pisces</i> -<br><i>VII</i> , 1986 |
| 3         | female   | 34         | 9°N EPR:<br>09° 50,52' N, 104°17,52' W               | 2524     | AMK - 4623, <i>Mir-1</i> ,<br>2003             |
| 4         | male     | 79         | 9°N EPR:<br>09° 50,52' N, 104°17,52' W               | 2524     | AMK-4623, <i>Mir-1</i> ,<br>2003               |
| 5         | female   | 808        | <i>Guaymas Basin</i> :<br>27° 00,47' N, 111°24,57' W | 2001     | AMK-4714, <i>Mir-2</i> ,<br>2003               |

109

## 110 **Histology & LM photography**

111 Four animals used for anatomical analysis were fixed in Bouin's solution and  
112 stored in 70% ethanol. The material was processed by the standard histological  
113 procedure, including dehydration in alcohols and embedding in paraffin, paraplast, or  
114 histowax. Transverse sections (5 and 7  $\mu\text{m}$ ) were produced with a Leica RM 2125  
115 microtome (Leica Microsystems, Wetzlar, Germany), stained with Caracci hematoxylin,  
116 and examined under a Zeiss Axioplan2 microscope equipped with AxioCam HRm  
117 camera (Carl Zeiss Microscopy, LLC, United States) as well as Leica DM5000 B  
118 equipped with Leica DFC425 C camera. Microscopic images optimized for contrast and  
119 level in Adobe Photoshop 7.0 (Adobe Systems, San Jose, CA, USA). Drawings were  
120 performed with Adobe Illustrator CC 2014. For visualization of the anastomosing  
121 neurites in the trunk epidermis a specimen of 808 mm was pictured by Canon Power  
122 Shot S90 camera.

123

## 124 **3D modeling**

125 Arrangements of neurite bundles in the brain and the anteriormost ventral nerve  
126 cord were visualized with the software 3D-DOCTOR 3.5.040724 (Able Software  
127 Corporation of Lexington, USA). Alignment was performed in the same software with  
128 comparing the sections of adjacent planes. Image seria of 77 cross sections of the 78  
129 mm specimen was used for modeling of the brain organization. 19 objects were traced  
130 inside brain, including boundary of the brain. Photos are saved in JPEG format with a  
131 resolution of 3900 x 3090 pixels and 8 bits / pixel. The field of view is 2812.00  $\mu\text{m}$ , the  
132 parameters of the voxels of the images are 0.721026 x 0.721026 x 15  $\mu\text{m}^3$ . On the  
133 basis of the outlined boundaries three-dimensional models were obtained. The  
134 smoothing tool used for natural perception of the surface of objects. Interactive features  
135 as well as transparency filter, different colours and lighting effects applied to show

136 complex and hidden objects. Three-dimensional images under appropriate angles were  
137 processed in Adobe Photoshop 7.0 (Adobe Systems, San Jose, CA, USA).

138

## 139 **Results**

### 140 **Gross anatomy of nervous system**

141 *Riftia*'s central nervous system is composed of a ventral **brain** and **ventral nerve cord**  
142 (*B*, *VNC*, Figs 1A, 2A, 3A, 4A).

143

#### 144 **Fig 1 Anterior part of the ventral nerve cord of *Riftia pachyptila*.**

145 A - scheme of the central nervous system which main elements are in grey, and giant  
146 axons are in light grey. The frame indicates the area corresponding to histological cross  
147 (B-D) and parasagittal (E) sections. Dotted lines show the region borders. B -  
148 posteriormost brain; elements of the ventral nerve cord projecting into the brain. C -  
149 ventral nerve cord (*VNC*) just posterior to the brain. D - longitudinal nerves in the  
150 transition of the ventral nerve cord and brain. E - the intraepidermal ventral nerve cord  
151 (*VNC*). *B* – brain, *CNC* – commissural neurite bundles of the *VNC*, *cpnc* – central  
152 perikarya of the *VNC*, *CU* – cuticle, *ECM* – extracellular matrix, *EP* – epidermis, *EXP* –  
153 epidermal cell processes, *GA* – giant axons, *GC* – enteral coelom, *LN* – circular neurite  
154 bundles, *lpnc* – lateral perikarya of the *VNC*, *lvtp* – ventrolateral perikarya of the  
155 tripartite ventral aggregation, *NE* – neuropile of the lateral brain lobes, *nep* – peripheral  
156 perikarya of the lateral brain lobes, *OB* – obturaculum, *OBC* – obturacular coelom, *OP* –  
157 opisthosome, *pmp* – posterior median perikarya aggregation, *PNC* – paired strands of  
158 the *VNC* surrounding the ventral ciliary field, *vtpt* - ventral perikarya of the tripartite  
159 ventral aggregation, *TR* – trunk, *VNC* – ventral nerve cord, *VT* – vestimentum, *VWF* –  
160 collar of the vestimental wings, *VWN* – neurite bundle of the *VW*.

161 **Fig 2 The ventral nerve cord in vestimentum of *Riftia*.**

162 A - scheme of the central nervous system which main elements are in grey, and giant  
163 axons are in light grey. The frame indicates the area corresponding to histological cross  
164 sections (B-E). B - ventral nerve cord just anteriorly to the ventral ciliary field. C - ventral  
165 ciliary field (*CF*) surrounded by the paired strands of the ventral nerve cord (*PNC*); line  
166 shows the border of the ciliary field, braces show the strands of the ventral nerve cord.  
167 D - precise view of the left strand of the ventral nerve cord, commissural neurite bundles  
168 connecting the paired strands are seen (*CNC*). E - lateral circular neurite bundles (*LN*)  
169 in the epidermis. *B* – brain, *BV* – blood vessels, *CNC* – commissural neurite bundles of  
170 the *VNC*, *CM* – circular musculature, *CF* – ventral ciliary field, *CIL* – cilia, *cpnc* – central  
171 perikarya of the *VNC*, *CU* – cuticle, *ECM* – extracellular matrix, *ega* – cells coating the  
172 *GA*, *EP* – epidermis, *GA* – giant axons, *LN* – circular neurite bundles, *lpnc* – lateral  
173 perikarya of the *VNC*, *NNC* – neuropile of the *VNC*, *OB* – obturaculum, *OP* –  
174 opisthosome, *PNC* – paired strands of the *VNC* surrounding the *CF*, *TR* – trunk, *VNC* –  
175 ventral nerve cord, *VT* – vestimentum.

176 **Fig 3 The ventral nerve cord in trunk and opisthosome of *Riftia*.**

177 A - scheme of the central nervous system which main elements are in grey, and giant  
178 axons are in light grey. The frame indicates the area corresponding to histological  
179 sections (B-D, F, G) and light microscopical image (E). B – the ventral nerve cord  
180 (*VNC*) structure in the anterior trunk. C, D - *VNC* structure in the midtrunk and posterior  
181 trunk, respectively; note the reduction of the giant axon diameter. E - lateral neurite  
182 bundles branching and making anastomoses in the trunk epidermis. F-E - *VNC* in the  
183 middle and posterior part of the opisthosome. Arrows in (F) show the cuticular folds  
184 between cell borders. *ECM* – extracellular matrix, *BV* – blood vessels, *CM* – circular  
185 muscles, *D* – dissepiments, *ega* – cells coating the *GA*, *EP* – epidermis, *EXP* –  
186 epidermal cell processes, *GA* – giant axons, *FM* – featherlike longitudinal muscles, *LG*



187 – longitudinal lateral grooves, *LM* – longitudinal muscles, *LN* – circular neurite bundles,  
188 *lpnc* – lateral perikarya of the *VNC*, *ME* – mesenterium, *NNC* – neuropile of the *VNC*,  
189 *OP* – opisthosome, *PA* – cuticular plaque papillae, *pl* – large perikarya, *ps* – small  
190 perikarya, *TR* – trunk, *VNC* – ventral nerve cord.

191 **Fig 4 Brain of juvenile *Riftia* with a gut rudiment.**

192 A - scheme of the sagittal section of the vestimentiferan brain which consists of  
193 supraesophageal and subesophageal ganglia. B - parasagittal section of the 8 mm long  
194 juvenile, the gut rudiment passes through the vestimentiferan brain. *amp* – anterior  
195 median aggregation of perikarya, *CUP* – cuticle schild, *DC* – dorsal commissure, *DLN* –  
196 dorsal area of the longitudinal bundles, *ET* – excretory tree, *G* – gut lumen, *GC* –  
197 enteral coelom, *H* – heart, *LNC* – lateral connectives, *nep* – peripheral perikarya of the  
198 lateral brain lobes, *OBC* – obturacular coelom, *OBL* – obturacular lobes, *OBV* –  
199 obturacular neurite bundles, *OBV* – obturacular blood vessels, *pmp* – posterior median  
200 perikarya aggregation, *SBC* – subenteral commissure, *SLN* – supraenteral longitudinal  
201 neurite bundles, *SPC* – supraenteral commissure, *SV* – *sinus valvatus*, *vtp* - tripartite  
202 ventral aggregation of perikarya, *VNC* – ventral nerve cord, *VWF* – collar of the  
203 vestimental wings.

204

205 Ventral brain lies in the anteriormost vestimentum (Figs 1A, 4A-B). There are two brain  
206 lobes forming heart-like shape on transverse sections (Figs 5-7, S1-S3 Figs). Dorsal  
207 furrow between the brain lobes encloses the **obturacules'** bases (*OBL*, Figs 4A, 5-6,  
208 S1 Fig). Posteriorly the **excretory tree** is adjacent to the brain (*ET*, Fig 4B). The whole  
209 brain lies inside the **epithelium**, and there are no basal laminae separating brain from  
210 epidermis (*EP*, Figs 4-7, S1-4). **Cuticle schild** protects the apical surface of the brain  
211 (*CUP*, Figs 4B, S1-3 Figs). **Collar of vestimental wings** shelters the ventral brain from  
212 outside (*VWF*, Fig 1B, 4). The 80 mm long specimen has a brain of 1 mm in height and

213 length, 2 mm in width. **Undifferential tentacle lamellae** lie on the dorsal and lateral  
214 surface of the brain (*LR*, Figs 5-7, S1-S3A, S5 Figs). Posterior brain has mainly dorsal  
215 lamellae (Figs 6-7, S3A Fig), whereas in anterior brain the tentacle lamellae occupy  
216 dorsal surface as well as descend to the lateral and ventrolateral surfaces (Figs 5, S1,  
217 S2 Figs).

218

219 **Fig 5. Anterior brain organization of *Riftia*.**

220 Scheme of histological cross section based on anterior brain sections of 79 mm long  
221 specimen (see S1 Fig). Level of the section shown at the diagram at the right lower  
222 coner. *amp* – anterior median aggregation of perikarya, *DC* – dorsal commissure, *DLN*  
223 – dorsal area of the longitudinal bundles, *dop* – dorsal aggregation of perikarya, *EP* –  
224 epidermis, *GC* – enteral coelom, *LNT* – longitudinal nerve tracts projecting from the  
225 *VNC* into the brain, *LR* – undifferential tentacle lamellae, *NE* – neuropile of the lateral  
226 brain lobes, *nep* – peripheral perikarya of the lateral brain lobes, *OBC* – obturacular  
227 coelom, *OBL* – obturacular lobes, *OBV* – obturacular neurite bundles, *OBV* –  
228 obturacular blood vessels, *SLN* – supraenteral longitudinal neurite bundles, *TEN* –  
229 neurite bundles of tentacles (palps), *VSN* – vertical supraenteral neurite bundles, *vtp* –  
230 tripartite ventral aggregation of perikarya, *vvtp* – ventral perikarya of the *vtp*, *XXL* – pair  
231 of prominent bundles of large longitudinal nerve tracts (part of *LNT*).

232 **Fig 6. Middle brain organization of *Riftia*.**

233 Scheme of cross section based on midbrain histological sections of 79 mm long  
234 specimen (see S2 Figure). Level of the section shown at the diagram at the right lower  
235 coner. *DC* – dorsal commissure, *DLN* – dorsal area of the longitudinal bundles, *dop* –  
236 dorsal aggregation of perikarya, *EP* – epidermis, *GA* – giant axons, *GC* – enteral  
237 coelom, *ECM* – extracellular matrix, *LNC* – lateral connectives, *LNT* – longitudinal nerve  
238 tracts projecting from the *VNC* into the brain, *LR* – undifferential tentacle lamellae, *lvtp* –

239 ventrolateral perikarya of the *vtp*, *NE* – neuropile of the lateral brain lobes, *nep* –  
240 peripheral perikarya of the lateral brain lobes, *OBC* – obturacular coelom, *OBL* –  
241 obturacular lobes, *OBV* – obturacular blood vessels, *pl* – large perikarya, *ps* – small  
242 perikarya, *SBC* – subenteral commissure, *SPC* – supraenteral commissure, *TEN* –  
243 neurite bundles of tentacles (palps), *vtp* - tripartite ventral aggregation of perikarya, *VPN*  
244 – posterior vertical median bundles.

245 **Fig 7. Posterior brain organization of *Riftia*.**

246 Scheme of cross section based on posterior brain histological sections of 79 mm long  
247 specimen (see S3 Figure). Level of the section shown at the diagram at the right lower  
248 coner. *DC* – dorsal commissure, *ECM* – extracellular matrix, *EP* – epidermis, *GA* – giant  
249 axons, *GC* – enteral coelom, *LNT* – longitudinal nerve tracts projecting from the ventral  
250 nerve cord into the brain, *LR* – undifferential tentacle lamellae, *lvtp* – ventrolateral  
251 perikarya of the *vtp*, *NE* – neuropile of the lateral brain lobes, *nep* – peripheral perikarya  
252 of the lateral brain lobes, *OBC* – obturacular coelom, *OBV* – obturacular blood vessels,  
253 *pl* – large perikarya, *pmp* – posterior median perikarya aggregation, *ps* – small  
254 perikarya, *SBC* – subenteral commissure, *TEN* –neurite bundles of tentacles (palps),  
255 *vtp* - tripartite ventral aggregation of perikarya, *vvtp* - ventral perikarya of the *vtp*.

256

257 Three coelomic channels pass through the brain tissue: pair of **obturacular coeloms**  
258 with blood vessels and unpaired **enteral coelom** (*OBC*, *GC*, Figs 4-7, S6 Fig). In  
259 juvenile undivuduals the enteral coelom comprises **gut rudiment** (*G*, Fig 4A). In larger  
260 specimens the enteral coelom is occupied with mesenchymal cells (Figs 6). In anterior  
261 brain the enteral coelom has «Λ» shape of transverse profile (Figs 5). Oral siphon is  
262 preserved in juvenile *Riftia* having 34 mm in length, and the intestine rudiment remains  
263 in the coelomic channel running through the brain, in individuals having 79 mm in  
264 length. In larger individuals the only coelomic channel remains.

265 Ventral nerve cord (VNC) connects to the brain *via* longitudinal neurite bundles (Figs  
266 1B-E). Anteriorly to the **ventral ciliary field (CF)** the VNC splits into a **pair of strands**  
267 (**PNC**) connected to each other with transverse neurite bundles (Fig 2A-D). The strands  
268 surround the ventral ciliary field (Figs 2B-C). The strands fuse into a single VNC at the  
269 border of the vestimentum and trunk and extend along ventral midline till the end of the  
270 body (Fig 3A). The width of the prominent VNC can reach up to 1 mm in a specimen of  
271 808 mm long (Fig 3B). Its width decreases to posterior trunk (Figs 3C-D).  
272 The VNC is lying inside the epidermis (Fig. 1E). The epidermal cells have a wide apical  
273 part adjacent to cuticle and basal process to the layer of the ECM (Fig. 1C).  
274 Apically thick cuticular layer (CU) protects VNC, especially in the anteriormost part (Fig  
275 1C). In opisthosome the cuticle protecting VNC makes folds between the apical parts of  
276 epidermal cells (arrows, Fig 3F).

277

## 278 **Dorsal brain structures**

279 Brain of *R. pachyptila* consists of dorsal and ventral parts divided by position of the  
280 enteral coelom (Figs 4-8).

281

## 282 **Fig 8. Supra- and subesophageal ganglia in *Riftia*.**

283 3D models of *Riftia* brain. A-D - supraesophageal neuronal elements. E-H -  
284 subesophageal neuronal elements in *Riftia* brain. View sides shown at the right lower  
285 corners of each images. Cube side is 255  $\mu$ m. Dashed lines point neural elements  
286 under transparent structures. *amp* – anterior median aggregation of perikarya, *DC* –  
287 dorsal commissure, *DLN* – dorsal area of the longitudinal bundles, *GA* – giant axons,  
288 *gap* – giant perikarya, *GC* – enteral coelom, *LNT* – longitudinal nerve tracts projecting  
289 from the ventral nerve cord into the brain, *lvtp* – ventrolateral perikarya of the *vtp*, *NE* –  
290 neuropile of the lateral brain lobes, *nep* – peripheral perikarya of the lateral brain lobes,

291 *pmp* – posterior median perikarya aggregation, *SBC* – subenteral commissure, *SPC* –  
292 supraenteral commissure, *SLN* – supraenteral longitudinal neurite bundles, *VPN* –  
293 posterior vertical median bundles, *VSN* – vertical supraenteral neurite bundles, *vtp* -  
294 tripartite ventral aggregation of perikarya, *vvtp* - ventral perikarya of the *vtp*.

295

296 Most part of the dorsal brain occupied by paired areas of **neuropile of the lateral brain**  
297 **lobes** (*NE*) in the thickness of which there are many perikarya (Figs 5-8, S1-S3, S7A-  
298 C', S8 Figs). Numerous radial tentacle neurite bundles extend from the neuropile of the  
299 lateral brain lobes to the bases of the tentacle lamellae, these are **tentacle neurite**  
300 **bundles** (*TEN*, Figs 5-6, S1-S3, S5 Figs). Each lamella represents the thin fold of the  
301 epidermis (Figs S5 A-D). Lamellae are closely adjacent to each other, and **epidermis of**  
302 **external lamellae wall** (*OEP*) is flattened, **epidermis of the internal wall** (*IEP*) is  
303 thicker and contain the basiepithelial tentacle neurite bundles (S5A Fig).

304 Neuropiles of right and left brain lobes are connected by thick extended **dorsal**  
305 **commissure** (*DC*, Figs 4, 5-7, 8A-C, 9, S1-S3, S7A-H Figs). It lies over the paired  
306 obturacular coelomic channels and adjacent to their loops anteriorly (S8F-G Figs).  
307 Transverse neurite bundles included in the dorsal commissure are divided into two  
308 almost equal parts: anterior and posterior commissures (Figs 9A, B, E, S8F, G Figs).  
309 Both dorsal commissures (anterior and posterior) of large specimen are structured in  
310 dorso-ventral direction and comprises of several layers of neurite bundles which are  
311 visible at the transverse section (up to 5 levels in 79 mm long specimen, S2A Fig). Up to  
312 9-11 ventro-dorsal vertical bundles go through the dorsal commissure clearly visible at  
313 sagittal and parasagittal sections (Fig 4A).

314

315 **Fig 9. Longitudinal nerve tracts and main commissures in *Riftia* brain.**

316 3D models of *Riftia* brain. A-E - main commissures (dorsal, *DC*, supra-, *SPC*, and  
317 subesophageal, *SBC*) and longitudinal nerve tracts (*LNT*). The latter is homologous to  
318 circumesophageal connectives in another annelids' brain. View sides shown at the right  
319 lower corners of each images. Cube side is 255  $\mu$ m. Dashed lines point neural elements  
320 under transparent structures. *DC* – dorsal commissure, *GA* – giant axons, *GC* – enteral  
321 coelom, *LNC* – lateral connectives, *LNT* – longitudinal nerve tracts projecting from the  
322 ventral nerve cord into the brain, *SBC* – subenteral commissure, *SPC* – supraenteral  
323 commissure, *XXL* – pair of prominent bundles of large longitudinal nerve tracts (part of  
324 *LNT*).

325

326 Two pairs of **obturacular neurite bundles** (*OBN*) extend from the dorsalmost area of  
327 the brain from the anterior dorsal commissure to the bases of obturacular lobes (Figs 5,  
328 10A, S1, S9A-F). Each pair of obruracular bundles (left and right) gives rise neurite  
329 bundles in the epidermis of inner and outer sides of the obturacular lobes. In that area  
330 neurite bundles run vertically, then in the dorsal part of obturacules move in posterior-  
331 anterior direction.

332 In the midbrain there is a weak **supraenteral commissure** (*SPC*) running over the  
333 enteral coelomic channel, but under the obturacular channels (Figs 4A, 9B-D, 10B, C,  
334 S3A, S8D-E, S9J, S10B, D Figs). In anterior brain two prominent **supraenteral**  
335 **longitudinal neurite bundles** (*SLN*) directs backward from the anteriormost brain and  
336 disintegrate into separate small bundles at the level of the supraenteral commissure  
337 (compare Figs 5&6, Figs 8A, S1, S2, S8, S10A, C, D Figs). Supraenteral longitudinal  
338 neurite bundles are connected to each other *via* **vertical supraenteral neurite bundles**  
339 (*VSN*) which have inverted «Y»-like shape (Figs 5, S2B, S8A-C Figs). Moreover, the  
340 vertical bundles join different parts of fibers of an **anterior median aggregation of**  
341 **perikarya** (*amp*): vertical fibers connect dorsal and ventral parts of the aggregation, as

342 well as transverse fibers connect left and right halves of the aggregation (Figs 4, 5, S2,  
343 S8 Figs).

344

345 **Fig 10. Histological details in the anterior brain of *Riftia*.**

346 A - obturacular neurite bundles (*OBN*) connecting with the dorsal commissure (*DC*). B,  
347 C - giant perikarya with clear nuclei in juvenile brain. D - anterior vertical median  
348 bundles (*VAN*) comprising of giant axons (*GA*). E - posterior vertical median bundles  
349 (*VPN*) with no giant axon. F - giant perikarion degrading in brain of 79 mm long male. G  
350 - cuticular plate protecting the brain (*CUP*). *ECM* – extracellular matrix, *CU* – cuticle,  
351 *CUP* – cuticle shield, *DC* – dorsal commissure, *DLN* – dorsal area of the longitudinal  
352 bundles, *dop* – dorsal aggregation of perikarya, *EP* – epidermis, *GA* – giant axons, *gap*  
353 – giant perikarya, *LNT* – longitudinal nerve tracts projecting from the *VNC* into the brain,  
354 *NE* – neuropile of the lateral brain lobes, *nep* – peripheral perikarya of the lateral brain  
355 lobes, *OBC* – obturacular coelom, *OBL* – obturacular lobes, *OBN* – obturacular neurite  
356 bundles, *OBV* – obturacular blood vessels, *pl* – large perikarya, *ps* – small perikarya,  
357 *SPC* – supraenteral commissure, *TEN* – neurite bundles of tentacles (palps), *vtp* -  
358 tripartite ventral aggregation of perikarya, *VPN* – posterior vertical median bundles, *VAN*  
359 – anterior vertical median bundles, *XXL* – pair of prominent bundles of large longitudinal  
360 nerve tracts (part of *LNT*).

361

362 On the dorsalmost side of the midbrain (close to ECM layer) there is a pair of **dorsal**  
363 **areas of the longitudinal bundles** (*DLN*, Figs 4A, 5, 6, 8A-D, 10A, S1, S2, S3A, S9A-  
364 C). They start from a **dorsal aggregation of perikarya** (*dop*) in the midrain (Figs 5,  
365 10A, S1, S2 Figs) and lie along the dorsal groove of the brain. The dorsal areas of the  
366 longitudinal bundles expand widely along the site of the groove until the place of  
367 obturacules enter the brain.



368 Short **anterior vertical median bundles** (*VAN*) pass between the obturacular coeloms  
369 in the midbrain (Figs 10B-D, S10 Fig). They extend ventro-dorsally between the  
370 supraenteral commissure and the the roots of anterior dorsal commissure. Anterior  
371 vertical median bundles comprise of the crossing neurite bundles: the neurite bundles  
372 originating from the right side of the supraenteral commissure extend to the left side of  
373 the dorsal commissure, and vice versa.

374 Posteriorly to the anterior vertical median bundles there are **posterior vertical median**  
375 **bundles** (*VPN*, Figs 6, 8B, 10E, S3A, S10 Figs). They do not contain any crossing  
376 bundles and connect the supraenteral commissure and the posterior dorsal  
377 commissure.

378 **Periferic perikarya of the lateral brain lobes** (*nep*, Figs 4-7, 8A-D, S1-S3, S5A, S6A,  
379 C, E, S7I, J, S9A Figs) are represented by two layers: inner layer of small perikarya, 5  
380  $\mu\text{m}$  (*ps*), and outer layers of big ones (*pl*), 20  $\mu\text{m}$  (Fig 7, S3A, S5A Figs). In juvenile  
381 specimens having lower number of tentacle lamellae the small perikarya are grouped  
382 into distinct lobules which correspond to the tentacle lamellae. In bigger specimens  
383 having higher number of tentacle lamellae arrangement of small perikarya are even. In  
384 anterior part of the brain the periferic zone of perikarya expands significantly and covers  
385 laterally a **tripartite ventral aggregation of perikarya** (*vtp*, Figs 5-7, S1-S3, S7I, J,  
386 Figs, more about *vtp* read below).

387 In the dorsal groove of the anterior brain there is a **dorsal aggregation of perikarya**  
388 (*dop*) which lies in the inner sides of obturacules entering the brain (Figs 5, 6, 10A, S1,  
389 S2, S3A Figs). It contains two layers of perikarya: in contrast to periferic perikarya there  
390 are inner big perikarya and outer small ones (Figs 5, 10A).

391 The **anterior median aggregation of perikarya** (*amp*) is the most anterior symmetrical  
392 accumulation of big somata (Fig 4, 5, 8A, C, S1, S2, S8 Figs). It is adjacent dorsally to  
393 the enteral coelomic channel.



394

## 395 **Ventral brain structures**

396 In the ventral brain, under the enteral coelomic channel, there is a main **subenteral**  
397 **commissure** (*SBC*, Fig 4, 6, 7, 8E-H, 9, S3, S8D-G Figs) which is a continuation of the  
398 transverse neurites in the ventral nerve cord (*CNC*, Fig. 2B).

399 The most neuropile of the ventral brain is occupied by paired prominent **longitudinal**  
400 **nerve tracts** (*LNT*, Figs 1B-D, 6, 7, 8B-D, 9, 10A, S1-S3, S7, S9B-J Figs) which are  
401 continuations of nerve fibers from the ventral nerve cord (Figs 1B-D). As the longitudinal  
402 nerve tracts come into the brain, each of them lies around three coelomic channels and  
403 gradually rises to the dorsal side of the brain (Figs 5-7).

404 In the dorsal brain the tracts contain a **pair of large bundles** of thick fibers, 6-11  $\mu\text{m}$  in  
405 diameter of a fiber (*XXL*, Figs 5, 9A, B, E, 10A-C, F, S2B, S7D, E, G, S9B, C Figs).  
406 Anteriorly the prominent bundles fall apart into several smaller bundles which  
407 disintegrate in the neuropile of the lateral brain lobes (S7A', B', D, G Figs).

408 Neurites of the neuropile of the lateral brain lobes (*NE*) originate from the longitudinal  
409 nerve tracts (Figs 5-7, 8B-D, S1-S3, S7 Figs).

410 In the anterior dorsal brain, the longitudinal nerve tracts are connected to each other *via*  
411 the dorsal commissures (*DC*) over the obturacular coeloms (Figs 5, 9, S1, S2, S7A'-H,  
412 S9B-C Figs) and *via* the supraenteral commissure (*SPC*) under the obturacular coeloms  
413 (Figs 6, 9B-D, S3A Fig). In the ventral brain the pair of the longitudinal nerve tracts are  
414 binded by subenteral commissure (*SBC*, Figs 6, 7, 9, S7B', C', G Figs).

415 The ventralmost part of the brain, under the enteral coelom, is occupied with the  
416 **tripartite ventral aggregation of perikarya** (*vtp*, Figs 4-7, 8E-H, 10G, S1, S2A, S6A-D,  
417 S7A-C, I, J, S8D, E Figs) comprising of small and big perikarya (Fig 6). On transverse  
418 sections it is divided in three lobes: ventral and two ventrolateral ones (*vvtp*, *lvtp*, Figs 7,  
419 S2B, S3, S6 Figs). In the posterior brain lobes enter the brain neuropile significantly

420 (Figs 6, 7, S3). In anterior brain the unpaired ventral lobe adjoins the ventral side of the  
421 enteral coelomic channel (Figs 5, 8F, G, S1, S2, S6D-F Figs). In the posterior brain two  
422 groups of big perikarya, **posterior median perikarya aggregations** (*pmp*), extend from  
423 the tripartite aggregation forward and lie along the left and right sides of three coelomic  
424 channels (Figs 7, 8E-H, S3B, S6F Figs).

425

## 426 **Giant perikaria and axons**

427 **Giant axons** run in the middle and posterior brain parts (*GA*, Figs 6, 7, 8B-H, 9, S3,  
428 S9G-L, S10B-G Figs). In juvenile and male specimens, we found two pairs of dorsal  
429 **giant perikarya** (*gap*) lying in the dorsal neuropile of the dorsal commissure and the  
430 longitudinal nerve tracts (Figs 10B, C, F). Nuclei as well as nucleoli remain in the giant  
431 perikarya of juvenile, but not in male specimen (Figs 10B, C). Axons of the dorsal giant  
432 perikarya run ventrally as part of the crossing **anterior vertical median bundles** (*VAN*,  
433 Figs 10B-D, S10 Fig).

434 3D-modelling of studied juveniles revealed two pairs of lateral branches of giant axons  
435 in lateral neuropiles of longitudinal nerve tracts which do not have giant perikarya (S9G,  
436 L, S10E-G Figs). Perhaps in younger specimens they remain. In the posterior brain the  
437 giant axons extend inside the longitudinal nerve tracts and continue inside the neuropile  
438 of the ventral nerve cord (Figs 9, S9G-J Figs). Transversally the giant axon represents  
439 the 20-25  $\mu\text{m}$  round profile with light cytoplasm and enveloped by flattened cells with  
440 dark nuclei (S3 Fig).

441

## 442 **Ventral nerve cord**

443 In vestimentum neuropile of the paired ventral nerve cord (*VNC*) consists of two lateral  
444 longitudinal nerves (*LNT*, Figs 1B-D) connected *via* transverse (commissural) neurite  
445 bundles (*CNC*, Figs 1B, D, 2B). Pair of giant axons lies in the central part of VNC (Figs

446 1A-D). Numerous small perikarya form two lateral and one central accumulations (*lpnc*,  
447 *cpnc*, Figs 1C, D) which are continuations of the ventral tripartite aggregation of the  
448 ventral brain (*vvtp*, Figs 1B, C).

449 Around the ventral ciliary field each strand of *PNC* contains the epidermal cells, basal  
450 neuropile, apical perikarya, and single fiber of the giant axon envelopped with the  
451 coating cells (*ega*) (Fig 2D). Most perikarya lie externally to the giant axon in each  
452 strand. The ciliary field consists of columnar ciliary epidermal cells (Fig 2C). In their  
453 basal parts there are commissural neurite bundles (*CNC*) which make a net and  
454 connect the strands with each other (Figs 2A, B, D).

455 In trunk the VNC has permanent diameter, neuropile has no swellings and separated by  
456 the giant axon into two longitudinal strands (Figs 3A-D). The epidermal cells' processes  
457 extend to the ECM inside the neuropile (*EXP*, Fig 3B). The VNC perikarya spread along  
458 left and right sides of the giant axon (Figs. 3B-D). There are small (3,5  $\mu\text{m}$ ) and big (20  
459  $\mu\text{m}$ ) perikarya (*ps*, *pl*, Fig 3B). Giant axon extends to the border of the trunk and  
460 opisthosome (Fig 3D).

461 In opisthosome an arrangement of the apical somata and basal neuropile of the VNC is  
462 the same as in the rest body (Figs 3F, G). There is no giant axon, all perikarya are  
463 small.

464

## 465 **Segmental nerve bundles**

466 In the anteriormost vestimentum several thick transverse **lateral neurite bundles** part  
467 off the ventral nerve cord (*LN*, Fig 1A). We found 3 pairs of them in 16 mm long  
468 specimen. The first pair, the most prominent one, directing to the anterior collar, is  
469 **neurites of vestimental wings** (*VWN*, Figs 1A, B). At the level of the ciliary field, many  
470 irregular bundles part off the lateral neuropile of the VNC strands and extend into the  
471 epidermis of the vestimental wings (Figs 2A, E). Transverse neurite bundles come off

472 the single VNC in the trunk. They intensively branch and make anastomoses (Fig 3E).  
473 In a 79 mm long specimen, lateral bundles part each 100  $\mu$ m off the cord, thus there are  
474 350-360 pairs of bundles in a trunk. In each opisthosomal segment a pair of lateral  
475 bundles leaves the neuropile of the VNC (Fig 3A, compare F&G).

476

## 477 **Discussion**

### 478 **Ventral nerve cord in Vestimentifera**

479 To date described species of vestimentiferans have uniform structure of the ventral  
480 nerve cord, except the length of giant axons and organization of perikarya aggregations  
481 in trunk [7,10–12,15,53,54]. The ventral nerve cord in *Ridgeia piscesae* and  
482 *Lamellibrachia satsuma* comprises of central neuropile and two lateral strands of  
483 perikarya, thus showing somewhat paired structure [10,12], whereas in *Riftia* (present  
484 study) and *Oasisia alvinae* there are single layers of apical perikarya and basal  
485 neuropile [11]. Also, in *O. alvinae* median groove was found to run along the midline of  
486 the ventral nerve cord in opisthosome [11].

487 Pair of giant axons extended from the pair of giant perikarya was found in  
488 vestimentiferans *Ridgeia*, *Riftia*, *Oasisia*, *Lamellibrachia* [5,10,11,13]. Giant axons  
489 terminate at different levels in trunk nerve cord: in *L. luymesii*, giant axons terminate in  
490 the anterior part of the trunk segment [53], in *L. barhami* extend a little further back [55],  
491 in *R. piscesae*, *O. alvinae* and *Riftia* they extend up to the border between trunk and the  
492 first opisthosome segment [10,11]. Earlier a pair of giant perikarya was found to be  
493 retained in juveniles of *R. piscesae* and *O. alvinae* in the mid-dorsal part of the brain  
494 [10,11,13,15]. We found two pairs of giant neurons in juveniles in the dorsal  
495 commissure of *Riftia* (Fig 10 B, C). Besides, the lateral branches of giant axons (S10E-  
496 G Figs) indicate the possible presence in earlier stages two pairs of giant perikarya in

497 the lateral areas of the neuropile. Thus, each giant fiber in *Riftia* is a product of the  
498 fusion of at least four pairs of axons.

499

## 500 **Ventral nerve cord in Siboglinidae**

501 Siboglinids have intraepidermal ventral nerve cord along which most of perikarya evenly  
502 dispersed [9,11,12,19,20,22,23,26–28]. All siboglinids have paired structure of the  
503 ventral nerve cord. First, the ventral nerve cord of vestimentiferans and frenulates have  
504 paired structure in vestimentum and forepart, respectively. Second, there is a pair of  
505 giant axons in vestimentiferans and large frenulates. Third, in frenulates,  
506 vestimentiferans and *Sclerolinum* the ventral cord bifurcates into two strands around the  
507 ventral ciliated field. In female *O. priapus*, the only *Osedax* species with the ventral  
508 ciliary field, pair of the ventral cords adjoins the ciliary field. Fourth, in *Osedax* species  
509 (females and males) there is an obvious pair of widely separated strands of the ventral  
510 nerve cord in trunk [9,19,20,22,26–28].

511 The ventral ciliary field which is unique structure conserved in all adult siboglinids lies in  
512 the anterior worm part: in trunk of frenulates, in vestimentum of vestimentiferans,  
513 forepart of *Sclerolinum* and anterior trunk of female *O. priapus* [9,22,27,28]. Although  
514 the ciliary field in frenulates and both vestimentiferans and *Sclerolinum* lies in different  
515 regions, in all cases it originates from the larval neurotroch. In developing larvae of  
516 frenulate *Siboglinum fiordicum* the anterior part of neurotroch extended to the future  
517 forepart, whereas posterior part of neurotroch extended to the future trunk. In *S.*  
518 *fiordicum* only posterior part of neurotroch remains in the in trunk of adults [56,57].  
519 Whereas in adult vestimentiferans it is in vestimentum corresponded to the frenulate  
520 forepart [9,27,58]. We assume that in adult frenulates and vestimentiferans different  
521 parts of the neurotroch remains, possibly due to different life modes of the larvae.

522 Vestimentiferan larvae swim long time in the water, whereas in frenulates it settles and  
523 simultaneously goes through metamorphosis.

524 Perikarya do not form accumulations along the most length of the ventral nerve cord,  
525 i.e. in forepart/vestmentum and trunk, but their number increases in the region of  
526 annular chaetae, as in frenulate *Lamellisabella zachsi* [19,20] and in short opisthosomal  
527 segments of frenulate *Siboglinum fiordicum* perikarya form ganglia [21,22]. In contrast  
528 to vestimentiferans' anchoring opisthosome, the frenulates' opisthosome is designed to  
529 protrude out of the posterior tube opening and dig into the sediment [22]. Due to the  
530 high mobility, in the frenulate opisthosome the nerve cords form three strands with pair  
531 of ganglia in each segment in *Siboglinum fiordicum* [21,59].

532 Giant axons in vestimentiferans *Ridgeia*, *Riftia*, *Oasisia* [10,11,13] were found to extend  
533 up to the posterior end of the the trunk . In large frenulates like *Spirobrachia* and  
534 *Lamelisabella* there is a pair of giant axons extended from the giant unipolar perikarya  
535 located in the brain [20,22]. In small frenulates like *Nereilinum* there is only one giant  
536 axon, and it goes only along one side of the ventral ciliary field [22]. In frenulates the  
537 giant axons extend only untill the girdle of hook-shaped chaetae located approximately  
538 in the middle of the trunk, whereas in the vestimentiferans untill the end of the trunk.

539 Giant axons provide a rapid contraction of the longitudinal musculature, serving as so-  
540 called "flight response" - in the frenulates and vestimentiferans it is the retraction of the  
541 body deep into the tube at the moment of danger (i.e. claws of crabs *Bythograea*).

542 Frenulates anchored to the wall of the tube with means of girdle chaetae, and the  
543 vestimentiferans - the chaetae of opisthosome. That is why the giant axons reach only  
544 girdle in frenulates, and in the vestimentiferans - to the opistosome. There are no giant  
545 axons in *Osedax* and *Sclerolinum*.

546 Thus, the nerve cord in siboglinids is arranged in the similar way. In the anterior part of  
547 the body the paired strands of the nerve cord associated with the ventral ciliary field. In

548 all groups, the nerve cord lies entirely within the epidermis and contains giant axons.  
549 The ventral nerve cord is not ganglionated for the most part of its length. The difference  
550 in the nervous systems is that the frenulates have a ganglionization in the opistosome,  
551 which probably indicates its greater mobility.

552

### 553 **Annelid ventral nerve cord in siboglinids**

554 Siboglinids have intraepidermal paired medullary ventral nerve cord containing the giant  
555 axons (except *Sclerolinum* and *Osedax*) and associated with the ventral ciliary field.

556 What features siboglinids share with the possible sister group of annelids?

557 Intraepidermal nervous system is also known in species of Opheliidae, Spionidae,  
558 Syllidae, Maldaniidae, Cossuridae, Polygordiidae, Protodrillidae etc as well as basal  
559 radiation Chaetopteridae, Magelonidae and Oweniidae [47,60–62]. Also, meiobenthic  
560 forms like Polygordiidae, Protodrillidae, Dinophiilidae have intraepidermal nervous  
561 system. So far, it is hard to tell the functional advantages of the intraepidermal nervous  
562 system or evolutionary aspects of it. Perhaps it is simply common among the sessile or  
563 meiobenthic forms.

564 Paired nerves in most annelids are found at the larval stages of Errantia, Sedentaria  
565 and their sister clade [48,52,63–69], whereas in adult annelids the nerve cord is  
566 organized in surprising range of levels: either single, paired, trineural, or pentaneural  
567 [47,60,70,71]. Based on presence of the paired nerve cords in the hypothetical sister  
568 clades Cirratulida and Sabellida [39,72] and paired organization of the nerve cord in  
569 siboglinids, we can conclude that the paired nerve strands within the ventral nerve cord  
570 might be ancestral feature for siboglinids (Fig 12).

571 Lack of ganglia in medullary nerve cord in long vestimentum/forepart and trunk  
572 segments of vestimentiferans and frenulates, and their presence in each segment of  
573 mobile frenulate opisthosome is unusual for the most annelids exhibiting the uniform



574 structure of the nerve cord along worm body as either medullary, or ganglionated one  
575 [47,60,70,71]. Non-uniform ventral nerve cord is known in oweniids: nerve cord  
576 exhibits medullary state in elongated anterior segments and ganglionated-like state in  
577 short posterior segments [44,52,73]. We assume in siboglinids medullary state of nerve  
578 cords in elongated segments is due to regular innervation of the structures in the  
579 segments which is convergent to the state of oweniid nerve cord.

580 The pattern of the segmental neurite bundles in vestimentiferans is similar to what we  
581 know in oweniids [44,52,73]: numerous and anastomosing in long segments and  
582 condensed single bundle in short opisthosomal segments. This pattern could be a  
583 reflection of the elongation of the segments.

584 Giant axons and giant perikarya are common among annelids, mainly in large forms  
585 [71,74]. Common feature of most annelids to have multicellular or unicellular giant fibres  
586 extending from the giant somata usually lying in subesophageal ganglia and/ or other  
587 segmental ganglia. In vestimentiferans it is known a pair of giant perikarya, whereas in  
588 *Riftia* we detected at least four pairs of somata lying in the area of supraesophageal  
589 ganglion. Among annelids only in sabellids, like large *Myxicola infundibulum* and  
590 *Sabella pavonina*, the giant perikarya lie in supraesophageal ganglion [74]. So, the  
591 vestimentiferans share with sabellids the similar position of the giant perikarya in the  
592 supraesophageal ganglion.

593 Vestimentiferans together with the rest siboglinids have the ventral ciliary field bordered  
594 by a pair of strands of the nerve cord. The ciliary field is not common among sexually  
595 matured annelids. The structure is known in progenetic *Dinophilus gyrotilatus* [75,76]  
596 and used for gliding. There is an observation that tiny frenulate *Nereilinum murmanicum*  
597 uses the ciliary field to glide vertically along its tube [23]. Other functions of the ventral  
598 ciliary fields in siboglinids remains theoretical [5]. Thus, it is the paired structure of the  
599 ventral nerve cord that siboglinids share with the possible annelid sister groups (Fig 12).



600

## 601 **Brain organization in vestimentiferans**

602 The differences in brain structure of vestimentiferan species are mainly in the shape of  
603 their brains and the presence/absence of cuticle structures [6,7,10–12,15,54].

604 *Riftia pachyptila*'s brain has heart-like shape at the transverse section with significantly  
605 developed dorso-lateral lobes (Fig 5, 8A-D). Brain of *Ridgeia piscesae* has triangular  
606 shape at transverse section with wide ventral side [10]. Brain of *Lamellibrachia luymesii*  
607 has oval transverse shape [6]. These two latter vestimentiferan species have less  
608 developed dorso-lateral lobes in comparison to *Riftia* (S5 Fig). *Riftia* is known to possess  
609 340 tentacles per lamellae and 335 lamellae on each side of the obturaculum whereas  
610 70 lamellae in *Escarpia* is the maximum lamellae number among the rest  
611 vestimentiferans [7,77,78]. This could be the explanation of the presence of the  
612 enlarged dorso-lateral lobes in *Riftia*'s brain. Notably, in spite of the brain shape  
613 differences, tentacle nerves originate from the same dorso-lateral areas of the brain  
614 neuropile in *Riftia* and all other vestimentiferans.

615 Cuticle shield protects ventral side of the brain that has a direct contact with the tube or  
616 ambient environment in all studied vestimentiferans as well as in *Riftia* (Fig 10G)  
617 [6,10,11,15]. The dorsal and frontal sides of the brain are covered by tentacles and  
618 obturacules (Figs 4, 5). Additionally, brain can be penetrated by cuticle shifts and plates  
619 extending from the cuticle of tentacle lamellae, as in *L. luymesii*, *R. piscesae*, *O. alvinae*,  
620 but not in *Riftia* [6,11,15].

621

## 622 **Annelid brain in vestimentiferans**

623 The juvenile vestimentiferans preserve the gut rudiment what assist to make  
624 homologization of the brain parts of the gutless siboglinids with the supra- and  
625 subesophageal ganglia of typical annelids.

626 The brain of the vestimentiferans lies completely in the epidermis at the anteriormost  
627 part of the vestimentum. It is the large and dense mass of the neuropile which looks like  
628 single entity, non-subdivided into the supraesophageal and subesophageal ganglia, as  
629 in most annelids [60]. Following the idea suggested by Jones and Gardiner [8] we  
630 assume that to the part of the brain of the vestimentiferans lying dorsally to the enteral  
631 coelomic channel can be homologized with the supraesophageal ganglion (Figs 4, 8 A-  
632 D, 11), whereas the part of the brain lying ventrally to the enteral coelomic channel –  
633 with the subesophageal ganglion (Figs 4, 8 E-H, 11).

634

635 **Fig 11. Hypothetical vestimentiferan brain origin.**

636 A - supra- and subesophageal ganglia in annelids (after [47]). B - hypothetical  
637 transitional state. C - vestimentiferan brain. *APN* – neurite bundles of palps, *B* – brain,  
638 *C* – commissure of *sbg*, *CC* – circumesophageal connectives, *DC* – dorsal commissure,  
639 *DRCC* – dorsal (posterior) root of the *CC*, *GC* – enteral coelom, *LNT* – longitudinal  
640 nerve tracts projecting from the ventral nerve cord into the brain, *sbg* – subesophageal  
641 ganglion, *SBC* – subenteral commissure, *spg* – supraesophageal ganglion (which is  
642 brain in annelids), *SPC* – supraenteral commissure, *VRCC* – ventral (anterior) root of  
643 *CC*, *TEN* – neurite bundles of tentacles (palps).

644

645 Longitudinal nerve tracts (*LNT*) lie ventrally in the posterior brain, while in the anterior  
646 brain tracts run symmetrically right and left to the enteral coelomic channel and connect  
647 each other by transverse commissures in the dorsal part of the anteriormost part of the  
648 brain. Thus, *LNT* can be homologized with the circumesophageal connectives of  
649 annelids (Figs 9, 11). In annelids the circumesophageal connectives enter the brain and  
650 bifurcate into ventral and dorsal roots [43,79–83]. Each root connects by a pair of dorsal  
651 and ventral commissures. Thus, in the annelid supraesophageal ganglion, there are two

652 pairs of transverse commissures: a dorsal pair and ventral one [43,47,81,83,84]. In  
653 vestimentiferans' dorsal brain part two transverse commissures can be distinguished:  
654 the dorsal commissure consisting of couple of transverse bundles, and the supraenteral  
655 commissure. Both commissures connect the nerve bundles of the longitudinal nerve  
656 tracts. We suppose that the dorsal and supraenteral commissures of the brain of  
657 vestimentiferans can be homologized with dorsal and ventral pairs of the commissures  
658 of the supraesophageal ganglion of typical annelids (Fig 11).

659 Posteriorly, longitudinal nerve tracts pass through the ventral part of the brain and come  
660 into the ventral nerve cord as the circumesophageal connectives in the annelid brain  
661 and continue as longitudinal connectives of the ventral nerve cord [84].

662 The innervation of numerous tentacles of *R. pachyptila* occurs from the neuropile of the  
663 lateral brain lobes (NE) containing radial tentacle neurite bundles (Figs 7, 8 A-D, 11C).  
664 Neuropiles of the lateral lobes adjoin the longitudinal nerve tracts which are possible  
665 homologues to the circumesophageal connectives (Fig 11). In annelids, the most part of  
666 the peristomial palps are innervated from the circumesophageal connectives [43,47].  
667 Previously, tentacles of vestimentiferans were homologised with palps of polychaetes  
668 [31], although based on differences in the external and internal structures (lack of  
669 ciliated grooves, absence of longitudinal support rods and the presence of the afferent  
670 and efferent blood vessels inside each tentacle) this homology was considered as  
671 doubtful [58]. Our data on the innervation of the tentacles of *Riftia* proves the annelid  
672 palps hypothesis of the vestimentiferan tentacles (Fig 11). But in the vestimentiferans  
673 (especially *Riftia*) the parts of longitudinal nerve tracts and neuropile of the lateral brain  
674 lobes are incomparably larger than corresponding neural structures in annelids,  
675 because the tentacle apparatus of vestimentiferans is significantly developed. The  
676 similar correlation between sizes of the tentacle crowns and brains are clearly seen in  
677 oweniids and sabellids. The brain of oweniids with simple gill tentacles is just a

678 transverse commissure passing in the epidermis dorsal to the digestive tract [44,73],  
679 whereas in sabellids with the large complecated tentacle crown serving for food  
680 collection the brain consists of main four transverse commisures and many other  
681 additional neural structures [43].

682 To summarize, the vestimentiferan brain shows similarity to the annelid brain  
683 organization if we accept the idea of Jones and Gardiner [8] that the brain is a result of  
684 the union of the supra- and subesophageal ganglia. In the dorsal part of the  
685 vestimentiferan brain (=supraesophageal ganglion) we found homologues of the dorsal  
686 and ventral pairs of the transverse commissures. The annelid brain shows remarkable  
687 variety of the organization [46,82,85,86]. Our comparative anatomical approache shows  
688 that the structure of the vestimentiferan brain and nervous system does not go beyond  
689 this diversity of the brain and the nervous system of annelids.

690 Selivanova et al. [87] conducted a single immunoreactive study on brains of  
691 vestimentiferan *Ridgeia piscesae* and identified 60 FMRFamide-immunoreactive  
692 neurons in posterior brain and 24 neurons in ventral part of the brain and single FMRF-  
693 amide IR-like processes in the medial zone of the brain neuropile. These specific  
694 FMRFamide IR-like correspond to the following components of the brain of *Riftia*  
695 *pachyptila*: posterior median perikarya aggregations (*pmp*, Figs 7; 8E-H; S6F Fig),  
696 ventrolateral lobe and posterior part of ventral lobe of tripartite ventral aggregation of  
697 perikarya (*lvtp*, *vvtp*, Figs 5; 6; 7; 8E-H; S6 A-D Figs) and vertical median bundles (*VAN*,  
698 *VPN*, Figs 6; S10 Fig). The effect of FMRFamide mediator are shown to support the  
699 heart pulsation, and tone of the esophagus and body walls in *Nereis virens* and  
700 *Sabellastarte magnifica* [88,89]. In molluscs, FMRF-amide mediator is known to excite  
701 and inhibit heartbeat [90], while in insects it controls heart function, somatic  
702 musculature, crop and salivary glands [91]. Indeed, FMRFamide IR-elements in the  
703 brain of *Riftia* are close to coelomic channels containing the rudimentary gut and

704 obturacule blood vessels (*pmp*, *VAN*, *VPN*, Figs 6, 7) and to the ventral wall of the body  
705 (*lvtp*, *vvtp*, Figs 5; 6; 7). Perhaps the mentioned brain components of the  
706 vestimentiferan brain are related to the functioning of the heart, gut and musculature of  
707 the body wall.

708

## 709 **Evolutionary aspects of siboglinid brain**

710 Vestimentiferans of genera *Riftia*, *Ridgeia*, *Oasisia*, *Lamellibrachia* and *Osedax* are the  
711 only siboglinids so far, whose brains were studied in detail [5,9,11,12,15,26,27,87] and  
712 present study]. Their brains completely lying in the ventral body epidermis and so far in  
713 spite of the fact that *Osedax* does not have gut rudiment as *Riftia*, it is still possible to  
714 find similar structures helping us to homologize parts of brains among siboglinids.

715 First, homologization of dorsalmost commissures in brain of *Riftia* (*DC*) and anterior  
716 commissure in *Osedax* (*ACBR*). They could be homologous to each other based on  
717 anteriormost position in the brains in both siboglinids as well as based on neurites  
718 originating from them. Various vertical neurite bundles originating from these dorsalmost  
719 commissures in vestimentiferans and *Osedax* (*DC* in *Riftia* and *ACBR* in *Osedax*)  
720 and innervate anterior structures: 1) obturacule neurites in vestimentiferans (*OBN* in  
721 *Riftia*) and antero-dorsal nerves or anterior nerve net in *Osedax* (*ADN* and *ANN*, Fig 12;  
722 see Fig 2 in Worsaae et al., 2016), 2) palp neurites in *Riftia* (*TEN*) and *Osedax* (*PN*).

723 Second, homologization of palp neurites in *Riftia* (*TEN*) and *Osedax* (*PN*) based on the  
724 similar origin of lateral parts of the anterior most commissures in *Riftia* (*DC*) and *Osedax*  
725 (*ACBR*, Fig 12).

726

727 **Fig 12. Reconstruction of hypothesized neural ancestor traits of siboglinid central**  
728 **nervous system.**

729 Relation among the siboglinid groups from a combination of recent phylogenetic trees:  
730 clade of frenulates resolved based on cladistic analysis [18], interrelationship of  
731 siboglinid clades based on phylogenetic and phylogenomic data [17,92]; annelid  
732 outgroups based on phylogenomic data [39]. Neural characters for homologization of  
733 cerebral elements of siboglinids and annelid sister groups are listed (1-8). Neural  
734 diagrams include sagittal views (upper row) and dorsal views (lower row) with  
735 disposition of the cerebral elements in the anteriormost end of the worms. Perikarya  
736 shown in gray blue. Anterior ends at the top. Dashed lines show hypothesized brain  
737 boundary in the siboglinid ancestor. Cerebral elements drawn based on larvae of  
738 vestimentiferan *Riftia pachyptila* [14], adult of vestimentiferan *Riftia pachyptila* (this  
739 study); *Osedax knutei* (=O. "nudepalp E", [27,93]); frenulates *Polybrachia annulata*, and  
740 *Siboglinum caulleryi* [19,20], *Nereilinum murmanicum* [23], cirratulid *Cirratulus cf.*  
741 *cirratulus* [50], sabellid *Euchone papillosa* [43]. *Sclerolinum's* cerebral elements of the  
742 ventral brain are not shown. H1 is a combination of the hypothesized ancestral  
743 siboglinid states. *ACBR* - anterior commissure of the brain, *ADN* - antero-dorsal nerve,  
744 *aga* - ganglion-like aggregation at base of *TEC*, *ANN* - anterior nerve net, *B* - brain, *C*  
745 - commissure in *sbg*, *CC* - circumesophageal connectives, *COM* - commissure, *CON* -  
746 connective, *DC* - dorsal commissure, *DRCC* - dorsal (posterior) root of the *CC*, *GC* -  
747 enteral coelom, *LLN* - lateral longitudinal neurite bundles in the brain, *LNT* - longitudinal  
748 nerve tracts projecting from the *VNC* into the brain, *MCC* - middle cross commissure,  
749 *NA* - nerve ring (after [20]) or brain ring (after [23]), *OBN* - obturacular neurites, *PCBR* -  
750 posterior commissure of the brain, *PN* - palp nerve, *TEC* - tentacular commissure,  
751 *TEN* - neurite bundles of tentacles (palps), *SBC* - subenteral commissure, *sbg* -  
752 subesophageal ganglion, *SPC* - supraenteral commissure, *spg* - supraesophageal  
753 ganglion, *VAN* - anterior vertical median bundles, *VNC* - ventral nerve cord, *VRCC* -  
754 ventral (anterior) root of *CC*.

755

756 Third, homologization of the supraenteral commissure in *Riftia* (*SPC*) and the anterior  
757 part of posterior commissure in *Osedax* (*PCBR*, Fig 12). In the brain of *Riftia* (present  
758 study) and *Osedax* [27] there are crossing neurites: in the median areas of the brains in  
759 *Riftia* (*VAN*) and *Osedax* (*MCC*). Based on the presence and position of crossing  
760 neurites, we consider these commissures which are connected by crossing neurites  
761 homologous to each other. This means that the thick posterior commissure in *Osedax*  
762 (*PCBR*) is homologous to the union of supra- and subenteral commissures in  
763 vestimentiferan brain (Fig 12). So, if in *Osedax* gut rudiment has been remained, it  
764 would pass through the *PCBR*.

765 Forth, based on listed above homologizations we consider the longitudinal nerve tracks  
766 in *Riftia* (*LNT*) are possibly homologous to lateral longitudinal bundles in *Oseadx* (*LLN*),  
767 and both are homologous to the circumesophageal connectives in the brain of annelids  
768 (Fig 12).

769 Organization of the brain of frenulates, sister group to all other siboglinids [2,92] are  
770 important for the analysis of the ancestral state of the siboglinid brain. Although their  
771 brains were studied in less details, but it is known in the dorsal epidermis in *Polybrachia*  
772 *annulata*, *Siboglinum caulleryi* there is a dorsal commissure [19,20], and in *Nereillum*  
773 *murmanicum*, *S. modestum* and *S. subligatum* there are two dorsal commissures [23].  
774 These commissures in frenulates give rise the neurite bundles to anterior appendages.  
775 We consider that these dorsal commissures (*NR*, *TEC*) bearing anterior appendages'  
776 nerves in frenulates (Fig 12) could be compared with the anterior commissures in  
777 ventral brain of vestimentiferans and *Osedax* (*DC* and *ACBR*, respectively) bearing  
778 nerves to palps. Moreover, we assume that according to innervation pattern, the  
779 anterior appendages in frenulates are also annelid palps.



780 Brain of *Sclerolinum* is very simple structure lying completely on the ventral side and  
781 having two layers: apical perikarya and basal neuropile [28]. Due to the described  
782 simplicity of the brain structure we do not homologize it with other siboglinids and  
783 annelids.

784 Intriguing question is what the ancestral state of the brain of siboglinid was and how it  
785 was evolved? Besides the frenulates, vestimentiferan metatrochophores have the  
786 commissures and perikarya in the dorsal epidermis [14]. And sister clades to  
787 Siboglinidae, Cirratulidae and Sabellidae (according to [39]), have well developed  
788 supraesophageal brain on the dorsal side of the body [43,50]. It is reasonable to  
789 hypothesize that the presence of the commissure, lying dorsally to the gut and giving  
790 rise neurite bundles to palps might be the ancestral state of the siboglinid brain (Fig 12).  
791

## 792 **Conclusions**

793 Our microscopical study and 3D reconstruction of the central nervous system of the  
794 giant vestimentiferan tubeworm *Riftia pachyptila* allowed to reveal the structure of the  
795 brain and ventral nerve cord.

796 Brain in adult vestimentiferans is a product of fusion of supraesophageal and  
797 subesophageal ganglia. In the part homologized with the supraesophageal ganglion  
798 there are two commissures: double dorsal commissure and single supraenteral  
799 commissures. In the subesophageal part there is the subenteral commissure. Based on  
800 the innervation of the anterior appendages from the longitudinal nerve tracts which are  
801 homologous to the circumesophageal connectives, tentacles of vestimentiferans are  
802 annelid palps. The innervation of the obturacles is different and will be discussed in the  
803 following publication. The ventral nerve cord of vestimentiferans is intraepidermal,  
804 paired, associated with the ciliary field, not ganglionated for the most part of its length.  
805 The latter is the feature of the elongation of the segments. In *Riftia* there is one giant



806 axon in the ventral nerve cord in trunk which is the product of fusion of several axons.  
807 The giant axon extends from at least four giant perikarya in *Riftia*. Surprisingly, the giant  
808 perikarya lie in the supraesophageal brain part of *Riftia*, like in sabellid annelids.  
809 The central nervous system of vestimentiferans and other siboglinids are arranged in  
810 the same way: anterior ventral brain and paired ventral nerve cord. All siboglinids share  
811 the same features of the ventral nerve cord: intraepidermal paired nerve cord  
812 associated with the ventral ciliary field (Fig 12). The comparative analysis of brain  
813 structures of the siboglinids suggests that the dorsal commissure bearing palp nerves is  
814 common for all siboglinids: it can be found in dorsal epidermis of frenulates and  
815 vestimentiferan larvae, in supraesophageal part of vestimentiferan brains and possibly it  
816 is anterior commissure found in *Osedax* (Fig 12). The difference in the nervous systems  
817 is that the vestimentiferans have a large and significantly differentiated brain which is  
818 reflection of the high development of the palp apparatus. *Osedax*, frenulates and  
819 *Sclerolinum* have less developed brain. Frenulates and *Sclerolinum* have good  
820 ganglionization in the opisthosome, which probably indicates its high mobility.  
821 The comparative anatomical analysis of the neural structures of the siboglinids and  
822 sister annelid clades lead us to hypothesize that the presence of the commissure, lying  
823 dorsally to the gut and giving rise neurite bundles to palps might be the ancestral state  
824 of the siboglinid brain.

## 825 **Acknowledgments**

826 We thank the chief scientists of Laboratory of Ocean Benthic Fauna and crews of RVs  
827 and ROVs of Shirshov Institute of Oceanology of the Russian Academy of Science for  
828 assistance and their continuous help in collecting the material.

829

## 830 **References**

- 831 1. Schulze A, Halanych KM. Siboglinid evolution shaped by habitat preference and  
832 sulfide tolerance. *Hydrobiologia*. 2003;496: 199–205.  
833 doi:10.1023/A:1026192715095
- 834 2. Halanych KM. Molecular phylogeny of siboglinid annelids (a.k.a. pogonophorans):  
835 a review. *Hydrobiologia*. 2005;535–536: 297–307. doi:10.1007/s10750-004-1437-  
836 6
- 837 3. Karaseva NP, Rimskaya-Korsakova NN, Galkin SV, Malakhov VV. Taxonomy,  
838 geographical and bathymetric distribution of vestimentiferan tubeworms  
839 (Annelida, Siboglinidae). *Biol Bull*. 2016;43. doi:10.1134/S1062359016090132
- 840 4. Webb M. *Lamellibrachia barhami*, Gen. Nov., Sp. Nov., (Pogonophora), from the  
841 Northeast Pacific. *Bull Mar Sci*. 1969;19: 18–47.
- 842 5. van der Land J, Nørrevang A. The systematic position of *Lamellibrachia*  
843 (Annelida, Vestimentifera). *Zeitschrift für Zool Syst und Evol*. 1975;1: 86–101.
- 844 6. van der Land J, Nørrevang A. Structure and Relationships of *Lamellibrachia*  
845 (Annelida, Vestimentifera). *Det K Danske Vidensk Selsk Biol Skr*. 1977;21: 1–102.
- 846 7. Jones ML. *Riftia pachyptila* Jones: Observations on the Vestimentiferan Worm  
847 from the Galapagos Rift. *Science*. 1981;213: 333–336.  
848 doi:10.1126/science.213.4505.333
- 849 8. Jones M, Gardiner S. Evidence for a transient digestive tract in Vestimentifera.  
850 *Proc Biol Soc Wash*. 1988;101: 423–433.
- 851 9. Gardiner S, Jones M. Vestimentifera. In: Harrison F, Rice M, editors. *Microscopic*  
852 *Anatomy of Invertebrates, Volume 12: Onychophora, Chilopoda, and Lesser*  
853 *Protostomata*. 1993. pp. 371–460.
- 854 10. Malakhov V, Popelyaev I, Galkin S. Microscopic anatomy of *Ridgeia phaeophiale*  
855 Jones, 1985 (Pogonophora, Vestimentifera) and the problem of the position of  
856 Vestimentifera in the system of animal kingdom. 2. Integument, nerve system,

- 857 connective tissue, musculature. Biol Morya. 1996;22: 139–147.
- 858 11. Karaseva NP, Malakhov V V., Galkin S V. The morphology and anatomy of the  
859 vestimentiferan worm *Oasisia alvinae* Jones, 1985 (Annelida: Siboglinidae). II.  
860 Integument, nervous system and musculature. Russ J Mar Biol. 2012;38: 10–21.  
861 doi:10.1134/S1063074012010075
- 862 12. Miyamoto N, Shinozaki A, Fujiwara Y. Neuroanatomy of the vestimentiferan  
863 tubeworm *Lamellibrachia satsuma* provides insights into the evolution of the  
864 polychaete nervous system. PLoS One. 2013;8: e55151.  
865 doi:10.1371/journal.pone.0055151
- 866 13. Jones ML, Gardiner SL. On the Early Development of the Vestimentiferan Tube  
867 Worm *Ridgeia* sp. and Observations on the Nervous System and Trophosome of  
868 *Ridgeia* sp. and *Riftia pachyptila*. Biol Bull. 1989;177: 254–276.  
869 doi:10.2307/1541941
- 870 14. Bright M, Eichinger I, von Salvini-Plawen L. The metatrochophore of a deep-sea  
871 hydrothermal vent vestimentiferan (Polychaeta: Siboglinidae). Org Divers Evol.  
872 2012;13: 163–188. doi:10.1007/s13127-012-0117-z
- 873 15. Mamkaev Y V., Selivanova R V., Punin MY. Comparative anatomical investigation  
874 of the nervous system of Vestimentifera (Pogonophora). Biol Morya. 1999;25:  
875 372–382.
- 876 16. Southward EC. Siboga-Expeditie Pogonophora. Siboga-Expeditie Uitkomsten op  
877 Zool Bonatisch, Oceanogr en Geol Geb verzameld Ned Oost-Indië 1899-1900.  
878 1961;25: 1–22.
- 879 17. Rouse GW, Goffredi SK, Vrijenhoek RC. Osedax: bone-eating marine worms with  
880 dwarf males. Science. 2004;305: 668–71. doi:10.1126/science.1098650
- 881 18. Rouse GW. A cladistic analysis of Siboglinidae Caullery , 1914 ( Polychaeta ,  
882 Annelida ): formerly the phyla Pogonophora and Vestimentifera. Zool J Linn Soc.

- 883 2001;1914: 55–80. doi:10.1006/zjls.2000.0263
- 884 19. Ivanov AV. The nervous system of Pogonophora. Zool zhurnal. 1958;37: 1682–  
885 1693.
- 886 20. Ivanov AV. Pogonophora. London: Academic Press; 1963.
- 887 21. Southward EC. A study of the structure of the opisthosoma of *Siboglinum*  
888 *fiordicum*. Zeitschrift fur Zool Syst und Evol Sonderh. 1975; 64–76.
- 889 22. Southward EC. Pogonophora. In: Harrison F, Westfall J, editors. Microscopic  
890 Anatomy of Invertebrates, Volume 12: Onychophora, Chilopoda, and Lesser  
891 Protostomata. Wiley-Liss. New York; 1993. pp. 327–369.
- 892 23. Bubko O, Minichev Y. Nervous system of *Nereilinum murmanicum* Ivanov and  
893 Taxonomic Status of Pogonophora. Zool zhurnal. 1977;56: 1277–1287.
- 894 24. Halanych KM, Lutz RA, Vrijenhoek RC. Evolutionary origins and age of  
895 vestimentiferan tube-worms. Cah Biol Mar. 1998;39: 355–358.
- 896 25. Gupta BL, Little C. Studies on Pogonophora. 4. Fine structure of the cuticle and  
897 epidermis. Tissue Cell 2. 1970; 637–696.
- 898 26. Worsaae K, Rouse GW. The simplicity of males: dwarf males of four species of  
899 *Osedax* (Siboglinidae; Annelida) investigated by confocal laser scanning  
900 microscopy. J Morphol. 2010;271: 127–42. doi:10.1002/jmor.10786
- 901 27. Worsaae K, Rimskaya-Korsakova NN, Rouse GW. Neural reconstruction of bone-  
902 eating *Osedax spp.* (Annelida) and evolution of the siboglinid nervous system.  
903 BMC Evol Biol. 2016;16: 83. doi:10.1186/s12862-016-0639-7
- 904 28. Eichinger I, Hourdez S, Bright M. Morphology, microanatomy and sequence data  
905 of *Sclerolinum contortum* (Siboglinidae, Annelida) of the Gulf of Mexico. Org  
906 Divers Evol. 2013;13: 311–329. doi:10.1007/s13127-012-0121-3
- 907 29. Black MB, Halanych KM, Maas P a. Y, Hoeh WR, Hashimoto J, Desbruyères D,  
908 et al. Molecular systematics of vestimentiferan tubeworms from hydrothermal

- 909 vents and cold-water seeps. *Mar Biol.* 1997;130: 141–149.  
910 doi:10.1007/s002270050233
- 911 30. McHugh D. Molecular evidence that echiurans and pogonophorans are derived  
912 annelids. *Proc Natl Acad Sci.* 1997;94: 8006–8009. doi:10.1073/pnas.94.15.8006
- 913 31. Rouse GW, Fauchald K. Cladistics and polychaetes. *Zool Scr.* 1997;26: 139–204.  
914 doi:10.1111/j.1463-6409.1997.tb00412.x
- 915 32. Halanych KM. Unsegmented Annelids? Possible Origins of Four  
916 Lophotrochozoan Worm Taxa. *Integr Comp Biol.* 2002;42: 678–684.  
917 doi:10.1093/icb/42.3.678
- 918 33. Bleidorn C, Vogt L, Bartolomaeus T. A contribution to sedentary polychaete  
919 phylogeny using 18S rRNA sequence data. *J Zool Syst Evol Res.* 2003;41: 186–  
920 195. doi:10.1046/j.1439-0469.2003.00212.x
- 921 34. Schulze A. Phylogeny of Vestimentifera (Siboglinidae, Annelida) inferred from  
922 morphology. *Zool Scr.* 2003;32: 321–342. doi:10.1046/j.1463-6409.2003.00119.x
- 923 35. Liwanow N, Porfirjewa N. Die Organisation der Pogonophoren und deren  
924 Beziehungen zu den Polychäten. *Biol Zent Bl.* 1967;86: 177–204.
- 925 36. Rousset V, Rouse GW, Siddall ME, Tillier A, Pleijel F. Cladistics 18S rRNA , 28S  
926 rRNA and morphological data. *Cladistics.* 2004;20: 518–533.
- 927 37. Uschakov P V. Eine neue form aus der Familie Sabellidae (Polychaeta). *Zool*  
928 *Anz.* 1933;104: 205–208.
- 929 38. Weigert A, Helm C, Meyer M, Nickel B, Arendt D, Hausdorf B, et al. Illuminating  
930 the base of the annelid tree using transcriptomics. *Mol Biol Evol.* 2014;31: 1391–  
931 401. doi:10.1093/molbev/msu080
- 932 39. Struck TH, Golombek A, Weigert A, Franke FA, Westheide W, Purschke G, et al.  
933 The Evolution of Annelids Reveals Two Adaptive Routes to the Interstitial Realm.  
934 *Curr Biol.* 2015; 1–7. doi:10.1016/j.cub.2015.06.007

- 935 40. Zrzavý J, Ríha P, Piálek L, Janouskovec J. Phylogeny of Annelida  
936 (Lophotrochozoa): total-evidence analysis of morphology and six genes. BMC  
937 Evol Biol. 2009;9: 189. doi:10.1186/1471-2148-9-189
- 938 41. Andrade SCS, Novo M, Kawauchi GY, Worsaae K, Pleijel F, Giribet G, et al.  
939 Articulating “ archiannelids ”: Phylogenomics and annelid relationships , with  
940 emphasis on meiofaunal taxa. Mol Biol Evol. 2015; doi:10.1093/molbev/msv157
- 941 42. Hess WN. Nervous system of the earthworm, *Lumbricus terrestris* L. J Morphol.  
942 1925;40: 235–259.
- 943 43. Orrhage L. On the structure and homologues of the anterior end of the polychaete  
944 families sabellidae and serpulidae. Zoomorphology. 1980;96: 113–167.  
945 doi:10.1007/BF00310081
- 946 44. Rimskaya-Korsakova NN, Kristof A, Malakhov V V, Wanninger A. Neural  
947 architecture of *Galathowenia oculata* Zach, 1923 (Oweniidae, Annelida). Front  
948 Zool. 2016;13: 1–19. doi:10.1186/s12983-016-0136-2
- 949 45. Hessling R, Westheide W. CLSM analysis of development and structure of the  
950 central nervous system of *Enchytraeus crypticus* (“Oligochaeta”, Enchytraeidae).  
951 Zoomorphology. 1999;119: 37–47. doi:10.1007/s004350050079
- 952 46. Müller MCM. Nerve development, growth and differentiation during regeneration  
953 in *Enchytraeus fragmentosus* and *Stylaria lacustris* (Oligochaeta). Dev Growth  
954 Differ. 2004;46: 471–478. doi:10.1111/j.1440-169x.2004.00763.x
- 955 47. Orrhage L, Müller MCM. Morphology of the nervous system of Polychaeta  
956 (Annelida). Hydrobiologia. 2005;535–536: 79–111.
- 957 48. Koza A, Wilhelm M, Hiripi L, Elekes K, Csoknya M. Embryogenesis of the  
958 serotonergic system in the earthworm *Eisenia fetida* (Annelida, Oligochaeta):  
959 Immunohistochemical and biochemical studies. J Comp Neurol. Wiley Online  
960 Library; 2006;497: 451–467. doi:10.1002/cne

- 961 49. Weidhase M, Bleidorn C, Helm C. Structure and anterior regeneration of  
962 musculature and nervous system in *Cirratulus cf. cirratus* (Cirratulidae, Annelida).  
963 J Morphol. 2014;275: 1–13. doi:10.1002/jmor.20316
- 964 50. Weidhase M, Helm C, Bleidorn C. Morphological investigations of posttraumatic  
965 regeneration in *Timarete cf. punctata* (Annelida: Cirratulidae). Zool Lett. BioMed  
966 Central; 2015;1: 1–16.
- 967 51. Zattara EE, Bely AE. Fine taxonomic sampling of nervous systems within  
968 Naididae (Annelida: Clitellata) reveals evolutionary lability and revised homologies  
969 of annelid neural components. Front Zool. 2015;12. doi:10.1186/s12983-015-  
970 0100-6
- 971 52. Helm C, Vöcking O, Kourtesis I, Hausen H. *Owenia fusiformis*--a basally  
972 branching annelid suitable for studying ancestral features of annelid neural  
973 development. BMC Evol Biol. BioMed Central; 2016;16: 129.
- 974 53. Land J, Norrevang A. Structure and relationships of *Lamellibrachia* (Annelida,  
975 Vestimentifera). Det K Danske Vidensk Selsk Biol Skr. 1977;21: 1–102.
- 976 54. Andersen AC, Hourdez S, Marie B, Jollivet D, Lallier FH, Sibuet M. *Escarpia*  
977 *southwardae* sp. nov., a new species of vestimentiferan tubeworm ( Annelida ,  
978 Siboglinidae ) from West African cold seeps. 2004;999: 980–999.  
979 doi:10.1139/Z04-049
- 980 55. Webb M. Studies on *Lamellibrachia barhami* (Pogonophora) II. The reproductive  
981 organs. Zool Jb Anat. 1977;97: 455–481.
- 982 56. Bakke T. Settling of the larvae of *Siboglinum fiordicum* Webb (Pogonophora) in  
983 the laboratory. Sarsia. Taylor & Francis; 1974;56: 57–70.
- 984 57. Bakke T. Development of *Siboglinum fiordicum* Webb (Pogonophora) after  
985 metamorphosis. Sarsia. Taylor & Francis; 1977;63: 65–73.
- 986 58. Southward EC, Schulze A, Gardiner SL. Pogonophora (Annelida): form and



- 987 function. *Hydrobiologia*. 2005;535–536: 227–251. doi:10.1007/s10750-004-4401-  
988 6
- 989 59. Webb M. The posterior extremity of *Siboglinum fiordicum* (Pogonophora). *Sarsia*.  
990 Taylor & Francis; 1964;15: 33–36.
- 991 60. Bullock T. Annelida, vol 1. In: Bullock T, Horridge G, editors. c. W. H. Free. San  
992 Francisco; 1965. pp. 661–789.
- 993 61. Jones ML. On the morphology, feeding, and behavior of *Magelona sp.* *Biol Bull*.  
994 1968;134: 272–297.
- 995 62. Zhadan A, Vortsepneva E, Tzetlin A. Ontogenetic development and functioning of  
996 the anterior end of *Cossura pygodactylata* Jones, 1956 (Annelida: Cossuridae).  
997 *Zoomorphology*. 2015;134: 509–521. doi:10.1007/s00435-015-0282-7
- 998 63. Hessling R, Westheide W. Are Echiura derived from a segmented ancestor?  
999 Immunohistochemical analysis of the nervous system in developmental stages of  
1000 *Bonellia viridis*. *J Morphol*. 2002;252: 100–13. doi:10.1002/jmor.1093
- 1001 64. Hessling R. Metameric organisation of the nervous system in developmental  
1002 stages of *Urechis caupo* (Echiura) and its phylogenetic implications.  
1003 *Zoomorphology*. 2002;121. doi:10.1007/s00435-002-0059-7
- 1004 65. Voronezhskaya EE, Tsitrin EB, Nezhlin LP. Neuronal development in larval  
1005 polychaete *Phyllodoce maculata* (Phyllodocidae). *J Comp Neurol*. 2003;455: 299–  
1006 309. doi:10.1002/cne.10488
- 1007 66. Brinkmann N, Wanninger A. Larval neurogenesis in *Sabellaria alveolata* reveals  
1008 plasticity in polychaete neural patterning. *Evol Dev*. 2008;10: 606–618.  
1009 doi:10.1111/j.1525-142X.2008.00275.x
- 1010 67. Brinkmann N, Wanninger A. Neurogenesis suggests independent evolution of  
1011 opercula in serpulid polychaetes. *BMC Evol Biol*. 2009;9. doi:10.1186/1471-2148-  
1012 9-270



- 1013 68. Meyer NP, Carrillo-Baltodano A, Moore RE, Seaver EC. Nervous system  
1014 development in lecithotrophic larval and juvenile stages of the annelid *Capitella*  
1015 *teleta*. Front Zool. BioMed Central; 2015;12: 15.
- 1016 69. Starunov V V, Voronezhskaya EE, Nezlin LP. Development of the nervous system  
1017 in *Platynereis dumerilii* (Nereididae, Annelida). Front Zool. 2017;14: 27.  
1018 doi:10.1186/s12983-017-0211-3
- 1019 70. Golding D. Polychaeta. In: Harrison F, Gardiner S, editors. Microscopic Anatomy  
1020 of Invertebrates, , Volume 7: Annelida. Harrison,. New York: Wiley-Liss, Inc.;;  
1021 1992. pp. 1–418.
- 1022 71. Purschke G. Annelida: Basal groups and Pleistoannelida. In: Schmidt-Rhaesa A,  
1023 Harzsch S, Purschke G, editors. Structure and evolution of invertebrate nervous  
1024 systems. Oxford Uni. Oxford University Press; 2015. pp. 254–312.
- 1025 72. Struck TH, Paul C, Hill N, Hartmann S, Hosel C, Kube M, et al. Phylogenomic  
1026 analyses unravel annelid evolution. Nature. 2011;471: 95–98.
- 1027 73. Bubko O, Minichev Y. Nervous system of Oweniidae (Polychaeta). Zool zhurnal.  
1028 1972;51: 1288–1299.
- 1029 74. Nicol JAC. The giant axons of annelids. Q Rev Biol. 1948;23: 291–323.  
1030 doi:10.1086/396594
- 1031 75. Fofanova EG, Nezlin LP, Voronezhskaya EE. Ciliary and nervous structures in  
1032 juvenile females of the annelid *Dinophilus gyrotilatus* (O. Schmidt, 1848)  
1033 (Annelida: Polychaeta). Russ J Mar Biol. 2014;40: 43–52.  
1034 doi:10.1134/S1063074014010040
- 1035 76. Kerbl A, Fofanova EG, Mayorova TD, Voronezhskaya EE, Worsaae K.  
1036 Comparison of neuromuscular development in two dinophilid species (Annelida)  
1037 suggests progenetic origin of *Dinophilus gyrotilatus*. Front Zool. BioMed Central;  
1038 2016;13: 49.

- 1039 77. Jones ML. On the Vestimentifera, new phylum: six new species, and other taxa,  
1040 from hydrothermal vents and elsewhere. Bull Biol Soc Washingt. National  
1041 Museum of Natural History, Biological Society of Washington; 1985;6: 117–158.
- 1042 78. Rimskaya-Korsakova NN, Malakhov VV. Organization of the tentacular apparatus  
1043 of the vestimentiferan tubeworm *Riftia pachyptila*, Jones 1981 (Annelida,  
1044 Vestimentifera). Dokl Biol Sci. 2010;433. doi:10.1134/S001249661004006X
- 1045 79. Rhode E. Histologische Untersuchungen über das Nervensystem der  
1046 Chaetopoden. Zool Beitr. 1887;2: 1–81.
- 1047 80. Gustafson G. Anatomische Studien über die Polychaeten Familien Amphinomidae  
1048 und Euprosynidae. Zool Bidr Upps. 1930; 305–471.
- 1049 81. Orrhage L. Über die Anatomie des zentralen Nervensystemes der sedentaren  
1050 Polychaeten. Ein Beitrag zur Diskussion über die Architektur des Polychaeten-  
1051 Gehirns und über den Begriff Palpen bei den Borstenwürmern. Ark für Zool.  
1052 1967;19: 99–133.
- 1053 82. Müller MCM, Berenzen A, Westheide W. Experiments on anterior regeneration in  
1054 *Eurythoe complanata* (“ Polychaeta ”, Amphinomidae ): reconfiguration of the  
1055 nervous system and its function for regeneration. Zoomorphology. 2003;122: 95–  
1056 103. doi:10.1007/s00435-003-0073-4
- 1057 83. Müller MCM, Henning L. Neurogenesis during regeneration in *Dorvillea*  
1058 *bermudensis* (Dorvilleidae)--formation of the polychaete cephalic ground pattern.  
1059 J Comp Neurol. 2004;471: 49–58.
- 1060 84. Müller MCM. Polychaete nervous systems: Ground pattern and variations--cLS  
1061 microscopy and the importance of novel characteristics in phylogenetic analysis.  
1062 Integr Comp Biol. 2006;46: 125–33. doi:10.1093/icb/icj017
- 1063 85. Hessling R, Purschke G. Immunohistochemical (cLSM) and ultrastructural  
1064 analysis of the central nervous system and sense organs in *Aeolosoma hemprichi*

- 1065 (Annelida, Aeolosomatidae). Zoomorphology. 2000;120: 65–78.
- 1066 doi:10.1007/s004350000022
- 1067 86. Müller MCM, Henning L. Ground plan of the polychaete brain--I. Patterns of nerve  
1068 development during regeneration in *Dorvillea bermudensis* (Dorvilleidae). J Comp  
1069 Neurol. 2004;471: 49–58. doi:10.1002/cne.20022
- 1070 87. Selivanova R V, Punin MY, Mamkaev Y V. FMRFamide Immunoreactive  
1071 Structures in the Nervous System of Vestimentiferan Species *Ridgeia piscesae*.  
1072 Dokl Biol Sci. 1997;354: 257–259.
- 1073 88. Diaz-Miranda L, de Motta GE, Garcia-Arrarás JE. Monoamines and  
1074 neuropeptides as transmitters in the sedentary polychaete *Sabellastarte*  
1075 *magnifica*: actions on the longitudinal muscle of the body wall. J Exp Zool Part A  
1076 Ecol Genet Physiol. Wiley Online Library; 1992;263: 54–67.
- 1077 89. Krajniak KG, Greenberg MJ. The localization of FMRFamide in the nervous and  
1078 somatic tissues of *Nereis virens* and its effects upon the isolated esophagus.  
1079 Comp Biochem Physiol Part C Comp Pharmacol. 1992;101: 93–100.  
1080 doi:[https://doi.org/10.1016/0742-8413\(92\)90205-L](https://doi.org/10.1016/0742-8413(92)90205-L)
- 1081 90. Painter G. A Survey of the Responses of Bivalve Hearts to the Molluscan  
1082 Neuropeptide FMRFamide and to 5-Hydroxytryptamine. Biol Bull. 1982;162: 311.  
1083 doi:10.2307/1540986
- 1084 91. Krajniak KG. Annelid Endocrine Disruptors and a Survey of Invertebrate  
1085 FMRFamide-Related Peptides. Integr Comp Biol. 2005;45: 88–96.  
1086 doi:10.1093/icb/45.1.88
- 1087 92. Li Y, Kocot KM, Whelan N V, Santos SR, Waits DS, Thornhill DJ, et al.  
1088 Phylogenomics of tubeworms (Siboglinidae, Annelida) and comparative  
1089 performance of different reconstruction methods. Zool Scr. Wiley Online Library;  
1090 2017;46: 200–213.

1091 93. Rouse GW, Goffredi SK, Johnson SB, Vrijenhoek RC. An inordinate fondness for  
1092 *Osedax* (Siboglinidae: Annelida): Fourteen new species of bone worms from  
1093 California. *Zootaxa*. 2018;4377: 451–489.

1094

1095

## 1096 **Supporting Information**

### 1097 **S1 Figure. Antermost brain of *Riftia*.**

1098 Histological cross section of the 79 mm long male. Level of the section shown at the  
1099 diagram, right lower coner. *amp* – anterior median aggregation of perikarya, *CU* –  
1100 cuticle, *CUP* – cuticle schild, *DC* – dorsal commissure, *DLN* – dorsal area of the  
1101 longitudinal bundles, *dop* – dorsal aggregation of perikarya, *EP* – epidermis, *GC* –  
1102 enteral coelom, *LNT* – longitudinal nerve tracts projecting from the ventral nerve cord  
1103 into the brain, *LR* – undifferential tentacle lamellae, *NE* – neuropile of the lateral brain  
1104 lobes, *nep* – peripheral perikarya of the lateral brain lobes, *OBC* – obturacular coelom,  
1105 *OBL* – obturacular lobes, *OBN* – obturacular neurite bundles, *OBV* – obturacular blood  
1106 vessels, *SLN* – supraenteral longitudinal neurite bundles, *TE* – free tentacles, *TEN* –  
1107 neurite bundles of tentacles (palps), *vtp* - tripartite ventral aggregation of perikarya.

1108

### 1109 **S2 Figure. Anterior and middle brain organization of *Riftia*.**

1110 A-B - histological cross sections of the 79 mm long male. Level of each section shown  
1111 at the diagram, right lower coner. *amp* – anterior median aggregation of perikarya, *CUP*  
1112 – cuticle schild, *DC* – dorsal commissure, *DLN* – dorsal area of the longitudinal neurite  
1113 bundles, *dop* – dorsal aggregation of perikarya, *EP* – epidermis, *GC* – enteral coelom,  
1114 *LNT* – longitudinal nerve tracts projecting from the ventral nerve cord into the brain, *LR*  
1115 – undifferential tentacle lamellae, *lvtp* – ventrolateral perikarya of the *vtp*, *NE* –  
1116 neuropile of the lateral brain lobes, *nep* – peripheral perikarya of the lateral brain lobes,

1117 *OBL* – obturacular lobes, *OBC* – obturacular coelom, *OBN* – obturacular neurite  
1118 bundles, *OBV* – obturacular blood vessels, *pl* – large perikarya, *ps* – small perikarya,  
1119 *SLN* – supraenteral longitudinal neurite bundles, *TE* – free tentacles, *TEN* –neurite  
1120 bundles of tentacles (palps), *VSN* – vertical supraenteral neurite bundles, *vtp* - tripartite  
1121 ventral aggregation of perikarya, *vvtp* - ventral perikarya of the *vtp*, *XXL* – pair of  
1122 prominent bundles of large longitudinal neurites (part of *LNT*).

1123

1124 **S3 Figure. Posterioormost brain organization of *Riftia*.**

1125 A-B - histological cross sections of the 79 mm long male. Level of the section shown at  
1126 the diagram, right lower coner. *CUP* – cuticle schild, *DC* – dorsal commissure, *DLN* –  
1127 dorsal area of the longitudinal neurite bundles, *dop* – dorsal aggregation of perikarya,  
1128 *EP* – epidermis, *GA* – giant axons, *GC* – enteral coelom, *LNC* – lateral connectives,  
1129 *LNT* – longitudinal nerve tracts projecting from the ventral nerve cord into the brain, *LR*  
1130 – undifferential tentacle lamellae, *lvtp* – ventrolateral perikarya of the *vtp*, *NE* –  
1131 neuropile of the lateral brain lobes, *nep* – peripheral perikarya of the lateral brain lobes,  
1132 *OBC* – obturacular coelom, *OBL* – obturacular lobes, *OBN* – obturacular neurites, *OBV*  
1133 – obturacular blood vessels, *pl* – large perikarya, *pmp* – posterior median perikarya  
1134 aggregation, *ps* – small perikarya, *SBC* – subenteral commissure, *SPC* – supraenteral  
1135 commissure, *SLN* – supraenteral longitudinal neurite bundles, *TEN* –neurite bundles of  
1136 tentacles (palps), *VPN*– posterior vertical median bundles, *vvtp* - ventral perikarya of the  
1137 *vtp*, *VSN* – vertical supraenteral neurite bundles.

1138

1139 **S4 Figure. Intraepidermal position of the brain.**

1140 A, B - schemes of sagittal and cross sections at levels (1-3) shown in (A). *B* – brain, *CU*  
1141 – cuticle, *CUP* – cuticle schild, *ECM* – extracellular matrix, *EP* – epidermis, *OBL* –  
1142 obturacular lobes, *VE* – vestimental process, *VNC* – ventral nerve cord.

1143

1144 **S5 Figure. Neural elements in the bases of the undifferential tentacle lamellae.**

1145 A - scheme of neural elements of the undifferential tentacle lamellae: perikarya and  
1146 neurite bundles. B-D - tentacle lamellae bases on the dorsal, lateral and ventrolateral  
1147 sides of the brain surface, respectively. *ECM* – extracellular matrix, *EP* – epidermis, *IEP*  
1148 – epidermis of the internal lamellae wall, *OEP* - epidermis of the external lamellae wall,  
1149 *LR* – undifferential tentacle lamellae, *NE* – neuropile of the lateral brain lobes, *nep* –  
1150 peripheral perikarya of the lateral brain lobes, *NB* – neurite bundles, *OB* – obturaculum,  
1151 *pl* – large perikarya, *ps* – small perikarya, *TEN* –neurite bundles of tentacles (palps).

1152

1153 **S6 Figure. Coelomic channels running through the brain.**

1154 3D models of *Riftia* brain. A, C, E - peripheric perikarya of the lateral brain lobes (*nep*)  
1155 are on the dorsal side of the brain (purple). B, D, F - tripartite aggregation of perikarya  
1156 (*vtp*) is on the ventral side and under the obturacular and enteral coeloms (blue). View  
1157 sides shown at the right lower corners of each images. Cube side is 255  $\mu$ m. Dashed  
1158 lines point neural elements under transparent structures. *GC* – enteral coelom, *lvtp* –  
1159 ventrolateral perikarya of the *vtp*, *nep* – peripheral perikarya of the lateral brain lobes,  
1160 *OBC* – obturacular coelom, *pmp* – posterior median perikarya aggregation, *vtp* -  
1161 tripartite ventral aggregation of perikarya, *vvtp* - ventral perikarya of the *vtp*.

1162

1163 **S7 Figure. Innervation of neuropile of the lateral brain lobes.**

1164 3D models of *Riftia* brain. A-C, A'-C' - neuropile of the lateral brain lobes (*NE*)  
1165 associated with the longitudinal nerve tracts (*LNT*). D-H - longitudinal nerve tracts  
1166 projecting from the ventral nerve cord into the brain (*LNT*) and giving rise the prominent  
1167 bundles of large longitudinal neurites (*XXL*). I-J - peripheric perikarya (*nep*) and  
1168 neuropile of the lateral brain lobes (*NE*). View sides shown at the right lower corners of

1169 each images. Cube side is 255  $\mu\text{m}$ . Dashed lines point neural elements under  
1170 transparent structures. *DC* – dorsal commissure, *DLN* – dorsal area of the longitudinal  
1171 bundles, *GA* – giant axons, *GC* – enteral coelom, *LNC* – lateral connectives, *LNT* –  
1172 longitudinal nerve tracts projecting from the ventral nerve cord into the brain, *NE* –  
1173 neuropile of the lateral brain lobes, *nep* – peripheral perikarya of the lateral brain lobes,  
1174 *SBC* – subenteral commissure, *SPC* – supraenteral commissure, *vtp* - tripartite ventral  
1175 aggregation of perikarya, *XXL* – pair of prominent bundles of large longitudinal nerve  
1176 tracts (part of *LNT*).

1177

1178 **S8 Figure. 3D-models of anterior neural elements of *Riftia* brain.**

1179 3D models of *Riftia* brain. A-C – overviews of supraenteral longitudinal neurite bundles  
1180 (*SLN*) extending from the anterior median perikarya aggregation (*amp*); D-E - anterior  
1181 median perikarya aggregation in association with the main cerebral elements: ventral  
1182 tripartite aggregation (*vtp*), dorsal commissure (*DC*) and supraenteral commissure  
1183 (*SPC*); F-G - anterior median perikarya aggregation (*amp*) and dorsal commissure (*DC*)  
1184 in association with the obturacular channels (*OBC*). View sides shown at the right lower  
1185 corners of each images. Cube side is 255  $\mu\text{m}$ . Dashed lines point neural elements  
1186 under transparent structures. *amp* – anterior median aggregation of perikarya, *DC* –  
1187 dorsal commissure, *GA* – giant axons, *GC* – enteral coelom, *LNC* – lateral connectives,  
1188 *OBC* – obturacular coelom, *SBC* – subenteral commissure, *SPC* – supraenteral  
1189 commissure, *SLN* – supraenteral longitudinal neurite bundles, *VSN* – vertical  
1190 supraenteral neurite bundles, *vtp* - tripartite ventral aggregation of perikarya.

1191

1192 **S9 Figure. Obturacular innervation and giant neurons in *Riftia* brain.**

1193 3D models of *Riftia* brain. A-C – disposition of obturacular neurite bundles (*OBN*) and  
1194 dorsal longitudinal bundles (*DLN*), D-F – origin of obturacular neurite bundles (*OBN*)

1195 from dorsal commissure, and neuropile of the lateral brain lobes (*NE*) from longitudinal  
1196 nerve tracts (*LNT*). G-J – giant axons (*GA*) and position of giant perikarya (*gap*); K-L –  
1197 position of giant neurons between the coelomic channels (*OBC*, *GC*). View sides shown  
1198 at the right lower corners of each images. Cube side is 255  $\mu\text{m}$ . Dashed lines point  
1199 neural elements under transparent structures. *DC* – dorsal commissure, *DLN* – dorsal  
1200 area of the longitudinal bundles, *GA* – giant axons, *GC* – enteral coelom, *gap* – giant  
1201 perikarya, *LNT* – longitudinal nerve tracts projecting from the *VNC* into the brain, *NE* –  
1202 neuropile of the lateral brain lobes, *nep* – peripheral perikarya of the lateral brain lobes,  
1203 *OBC* – obturacular coelom, *OBN* – obturacular neurites, *SPC* – supraenteral  
1204 commissure, *XXL* – pair of prominent bundles of large longitudinal nerve tracts (part of  
1205 *LNT*).

1206

1207 **S10 Figure. Vertical midbrain neurite bundles.**

1208 3D models of *Riftia* brain. A-D - anterior (*VAN*) and posterior (*VPN*) vertical median  
1209 bundles in between other midbrain structures, E-G - giant axons (*GA*) running inside the  
1210 crossing anterior median bundles (*VAN*). View sides shown at the right lower corners of  
1211 each images. Cube side is 255  $\mu\text{m}$ . Dashed lines point neural elements under  
1212 transparent structures. *DC* – dorsal commissure, *GA* – giant axons, *GC* – enteral  
1213 coelom, *gap* – giant perikarya, *LNC* – lateral connectives, *OBC* – obturacular coelom,  
1214 *SBC* – subenteral commissure, *SLN* – supraenteral longitudinal neurite bundles, *SPC* –  
1215 supraenteral commissure, *VAN* – anterior vertical median bundles, *VPN* - posterior  
1216 vertical median bundles.

1217

1218



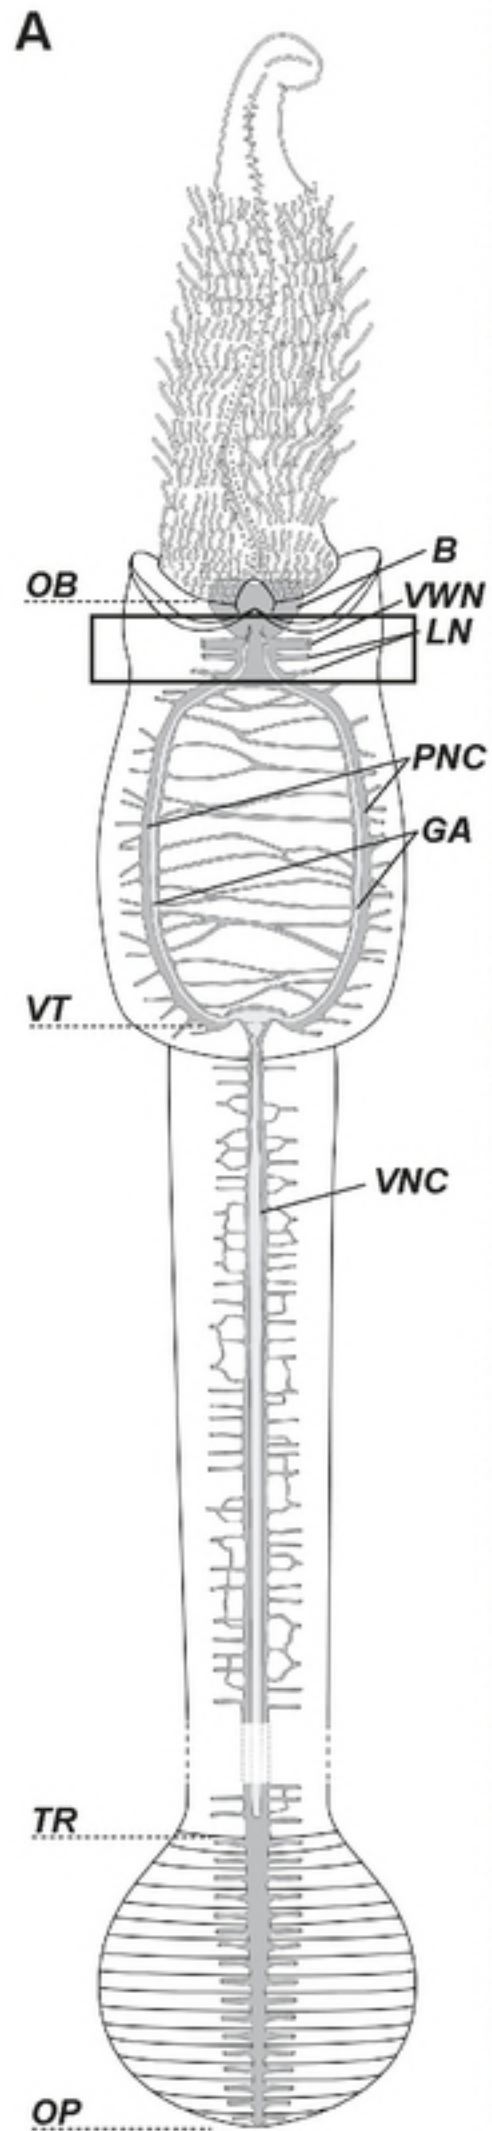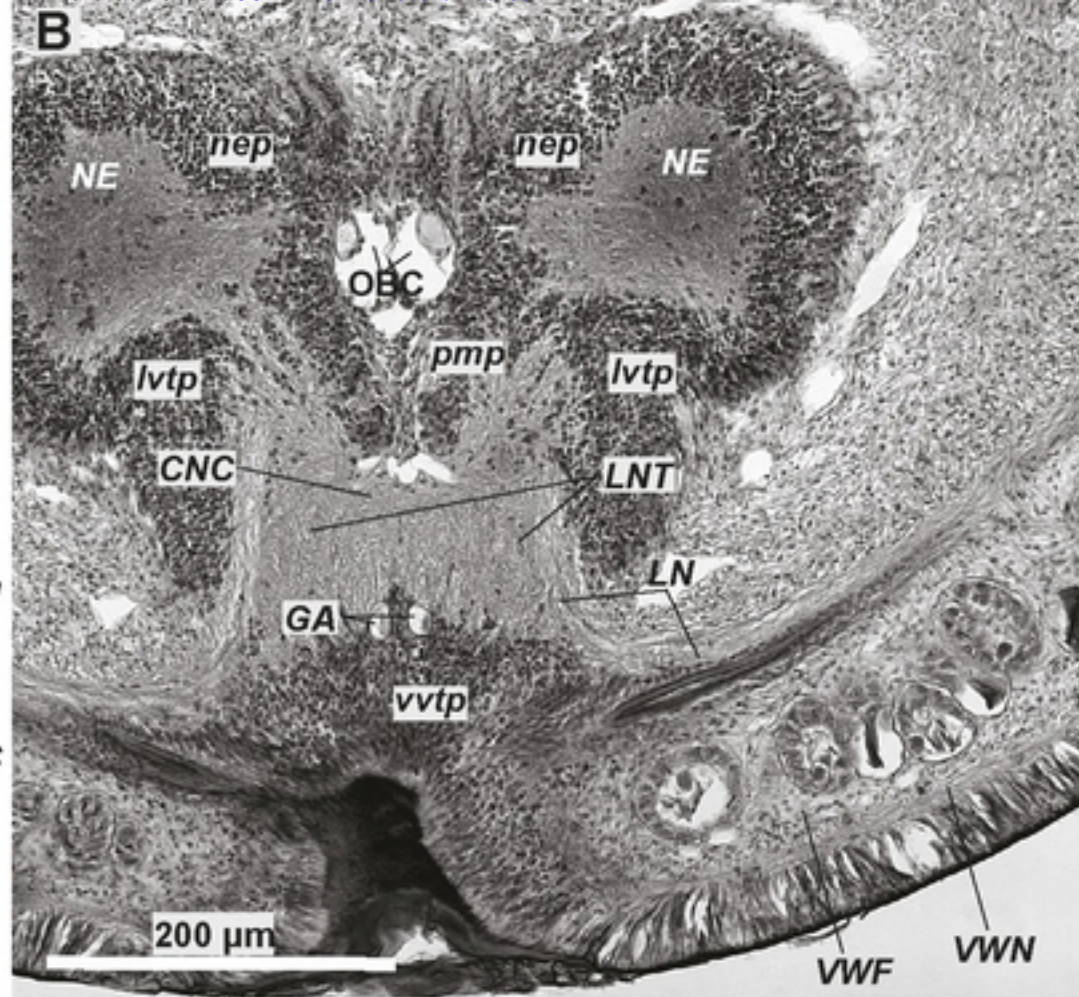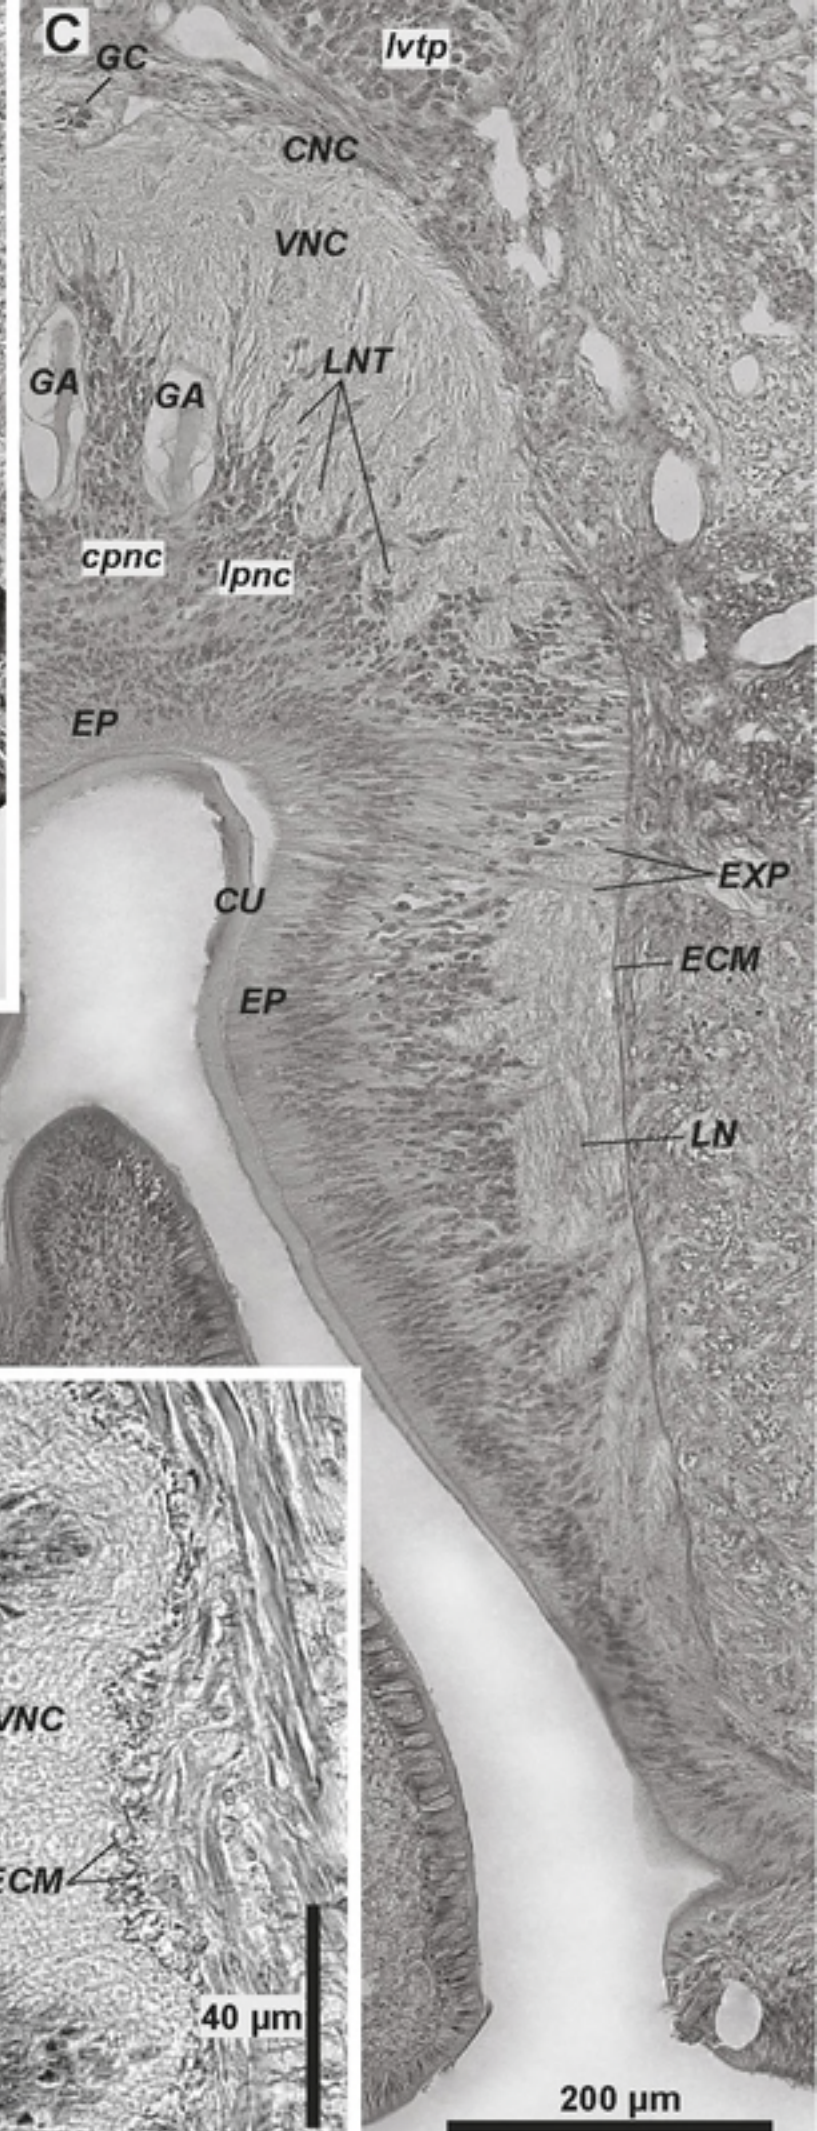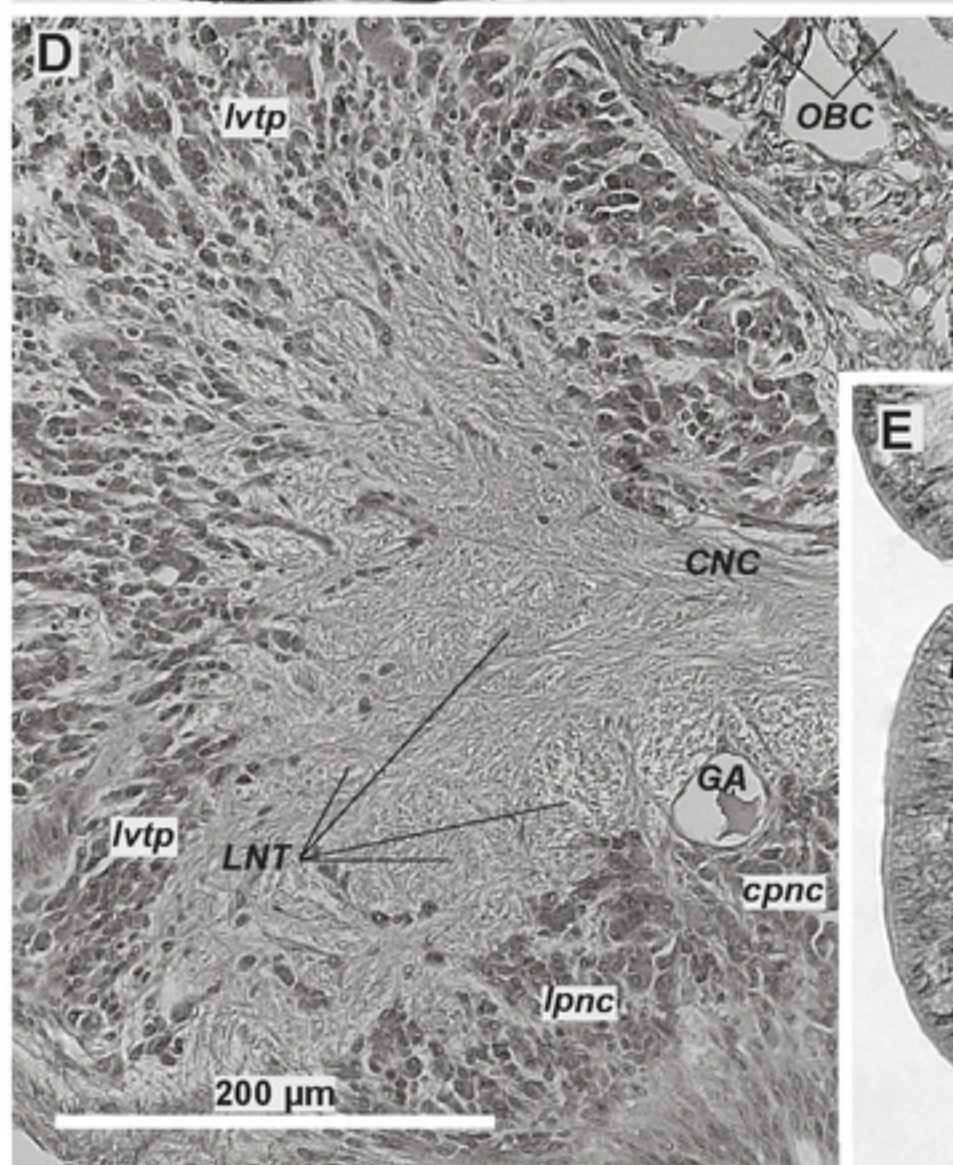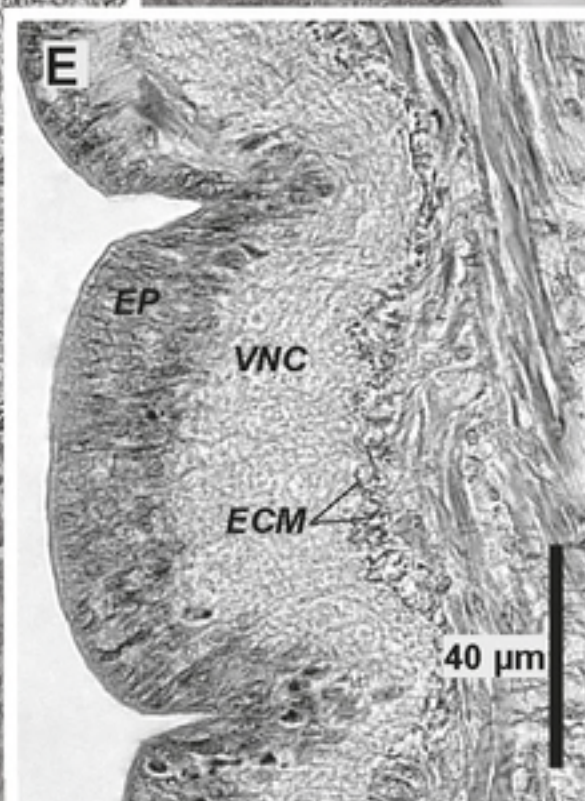



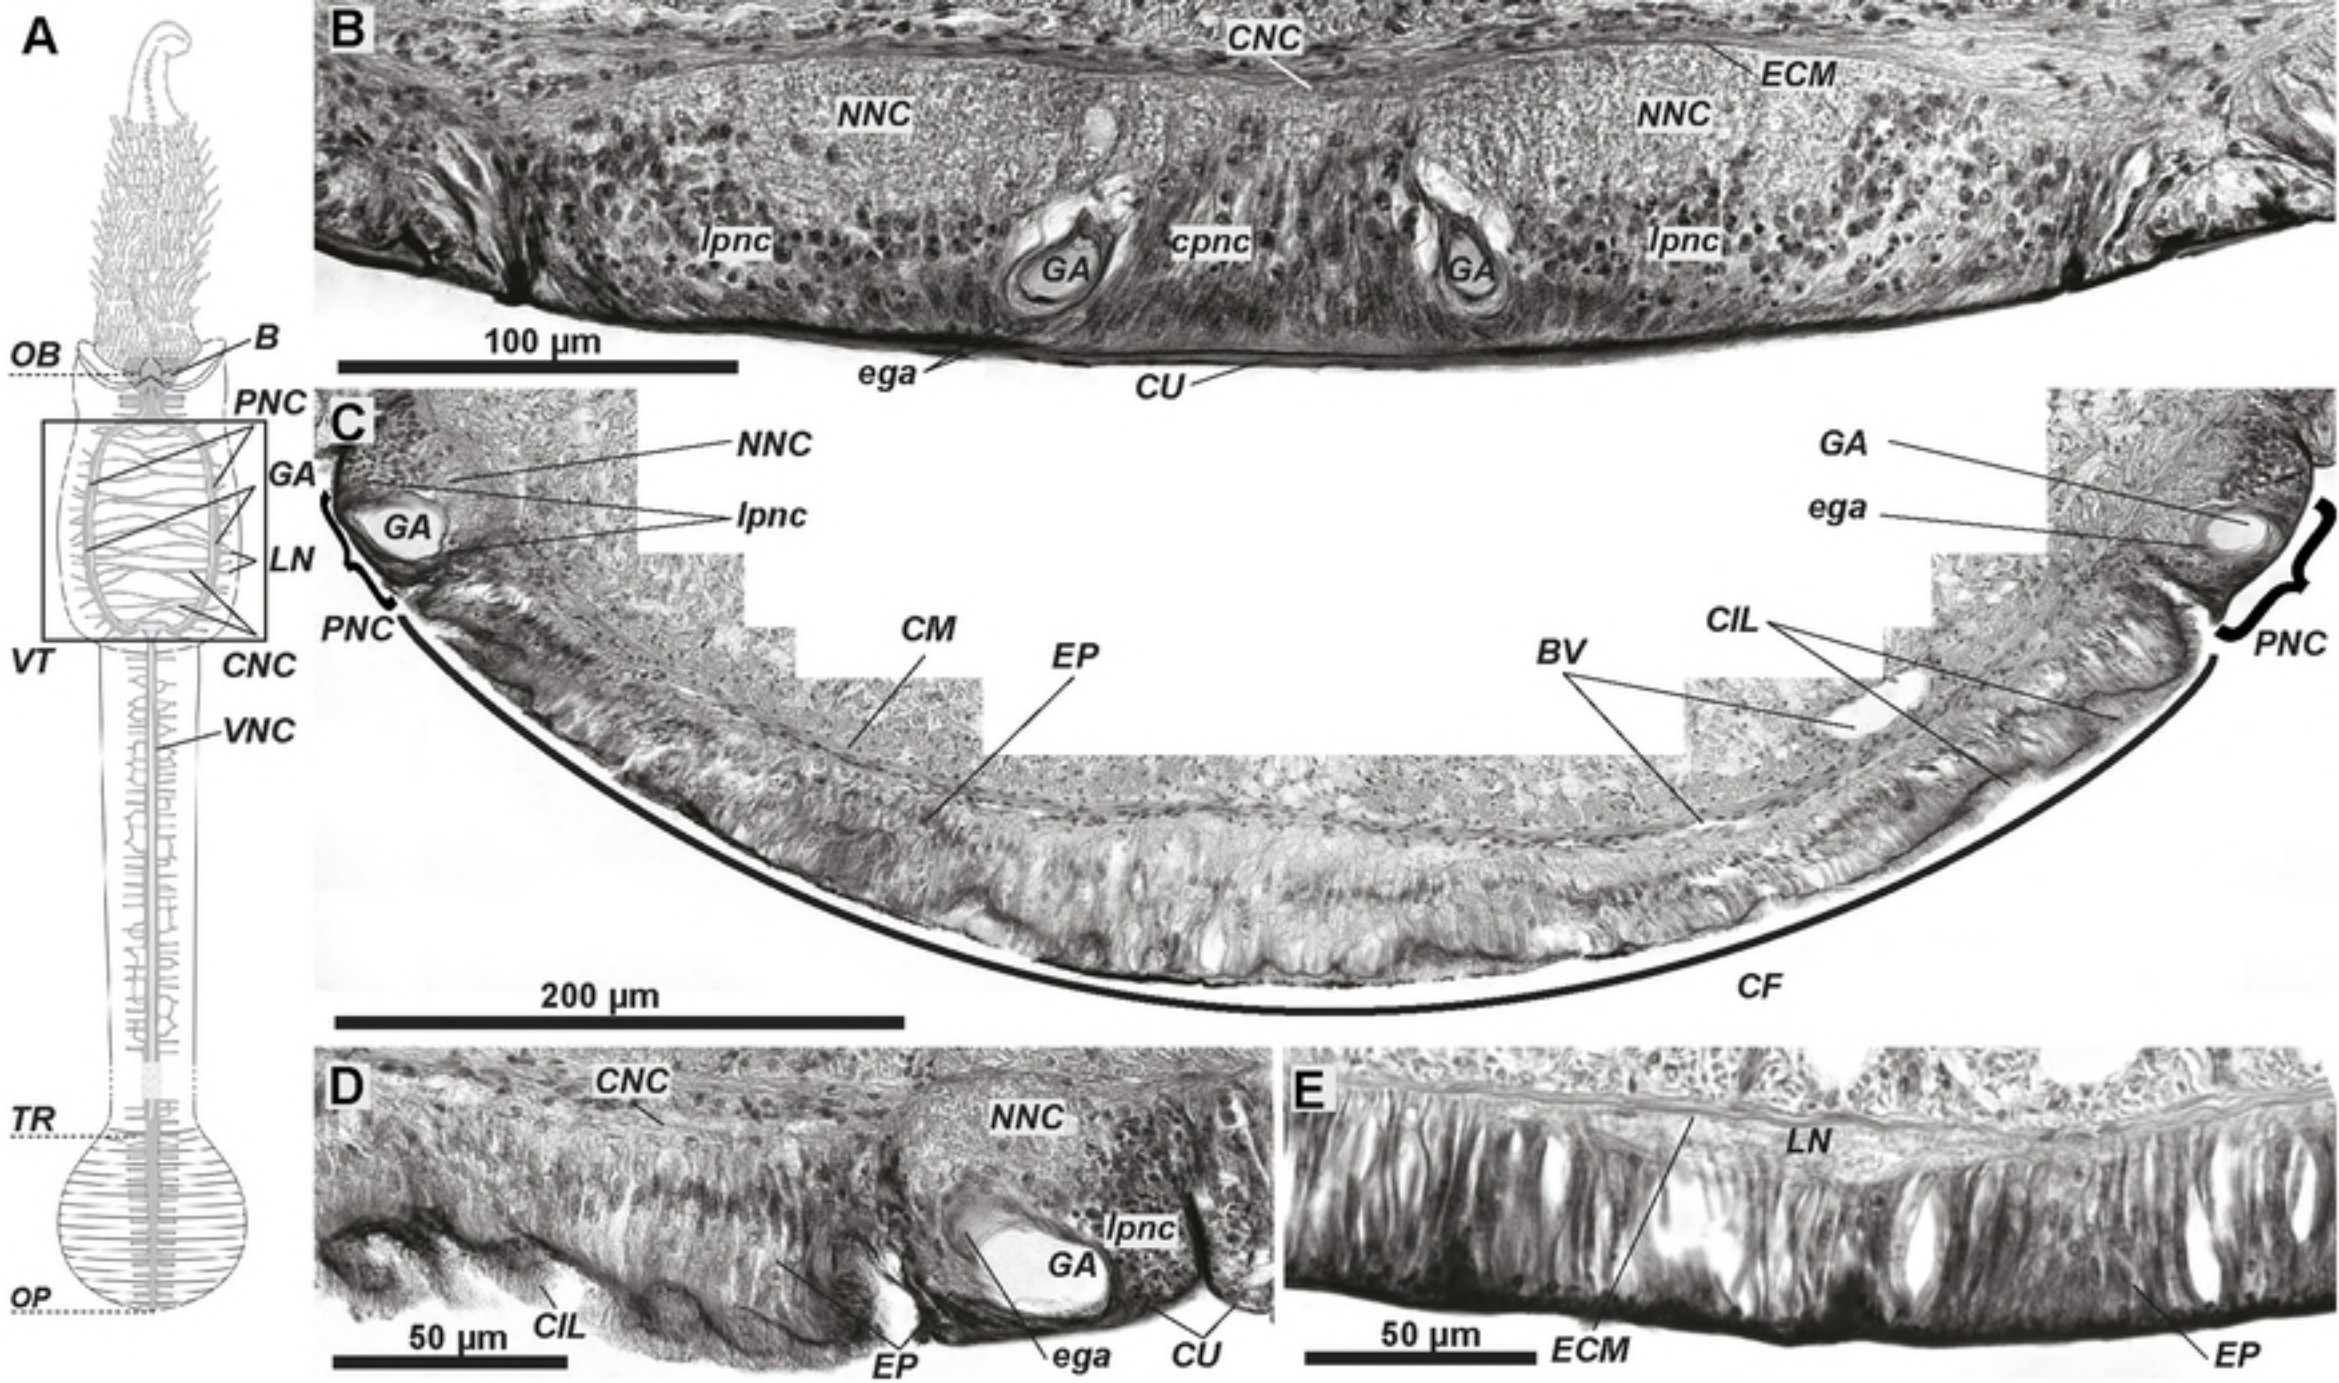



A

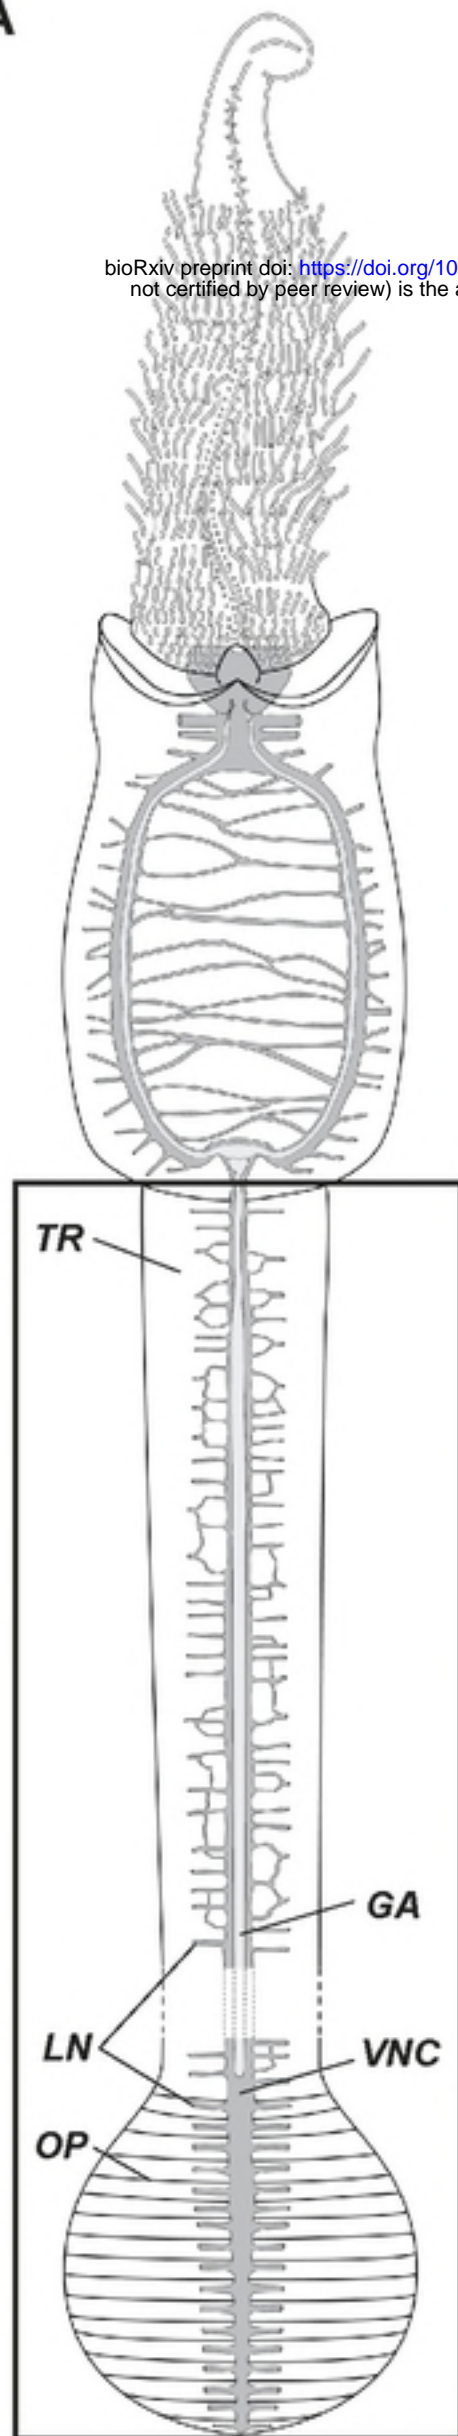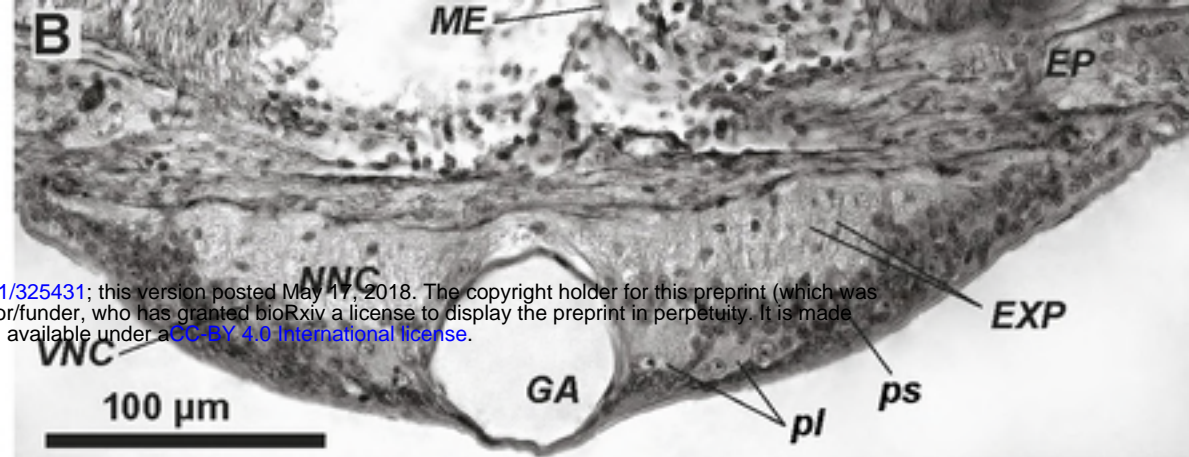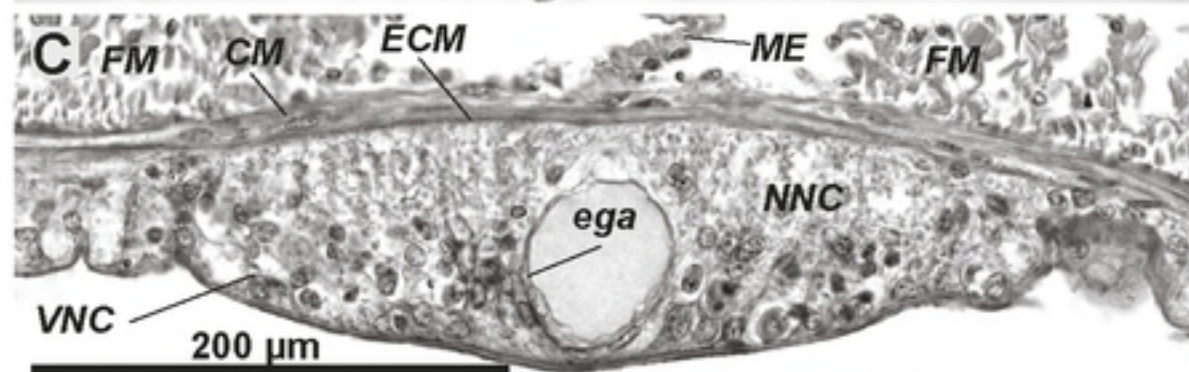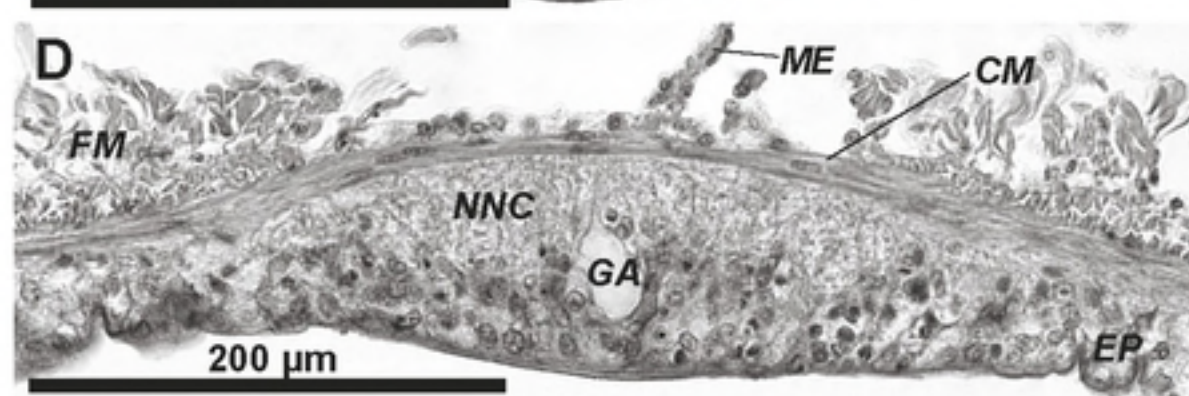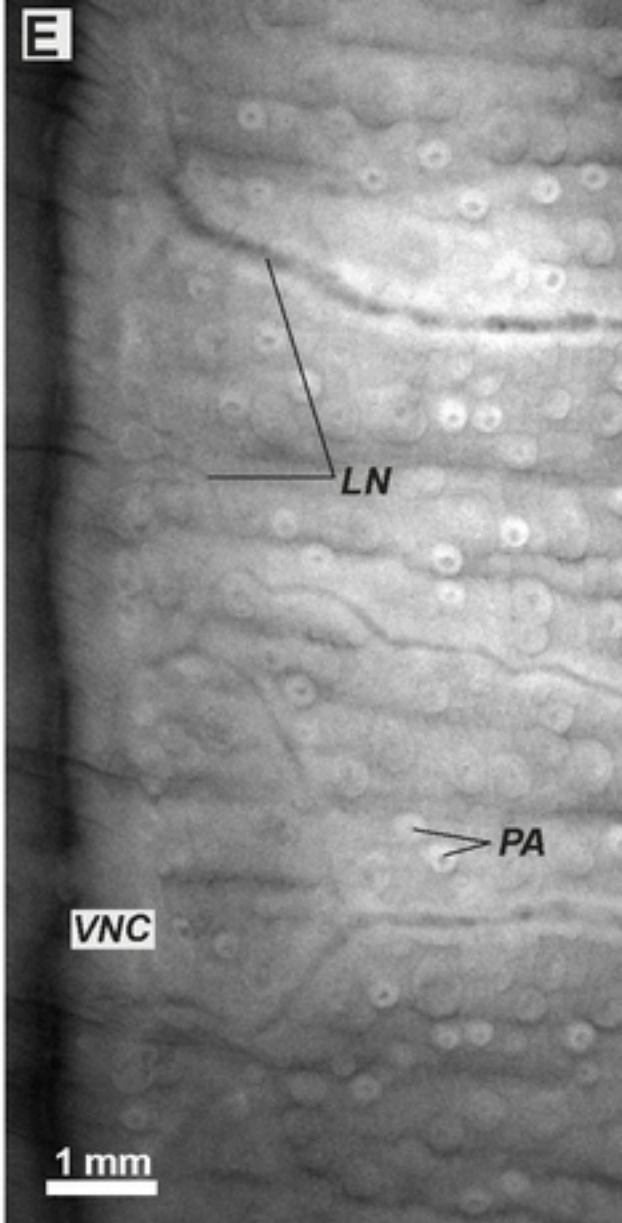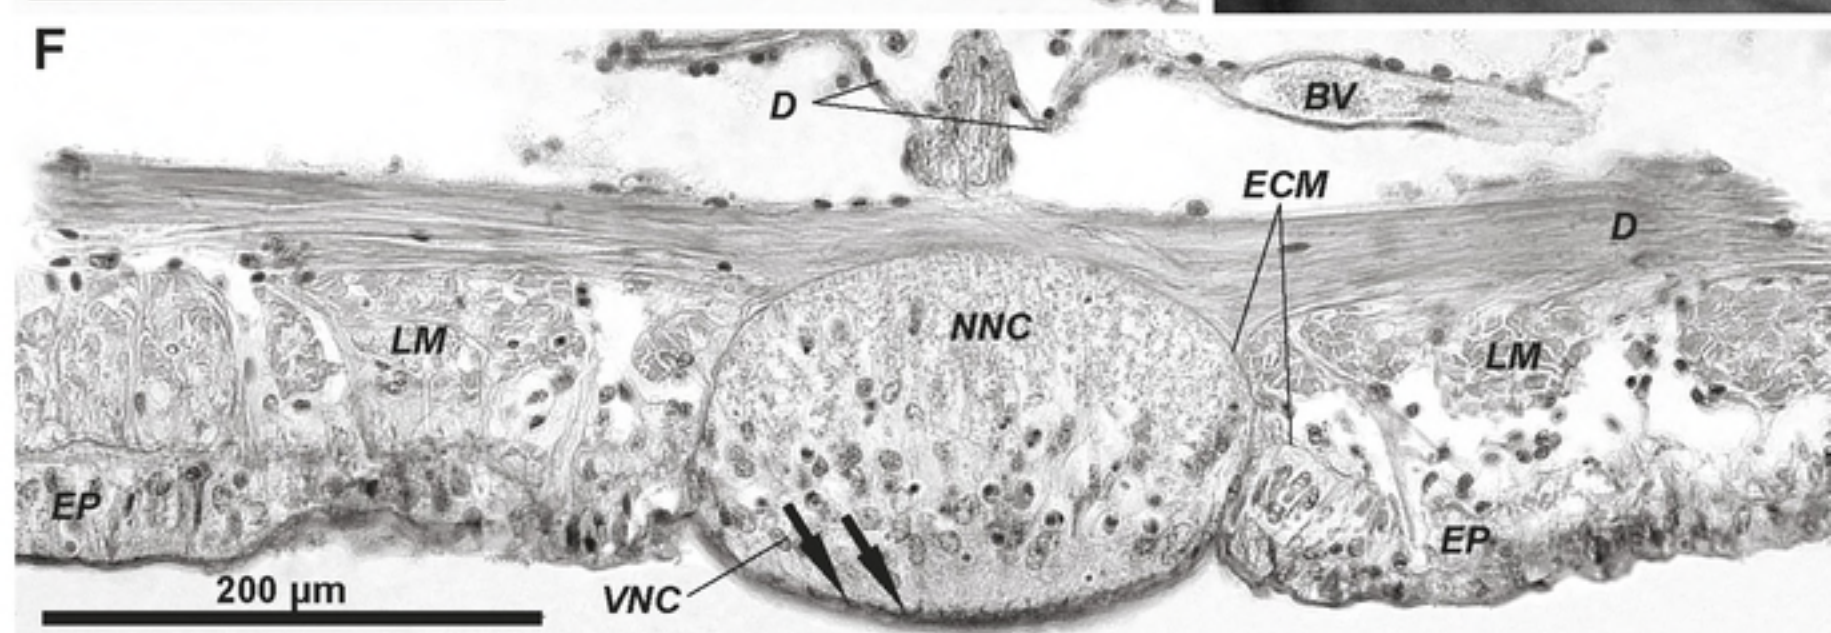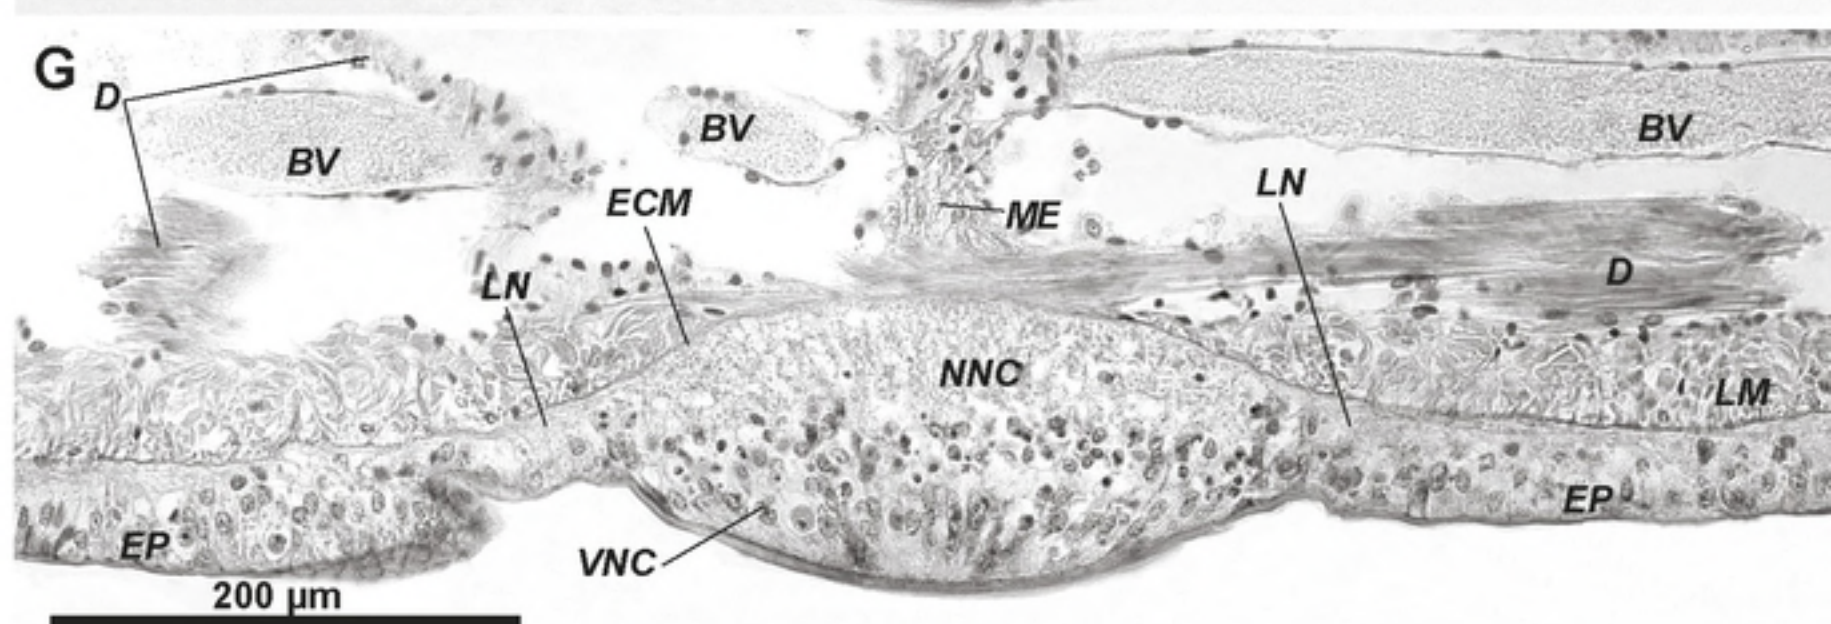



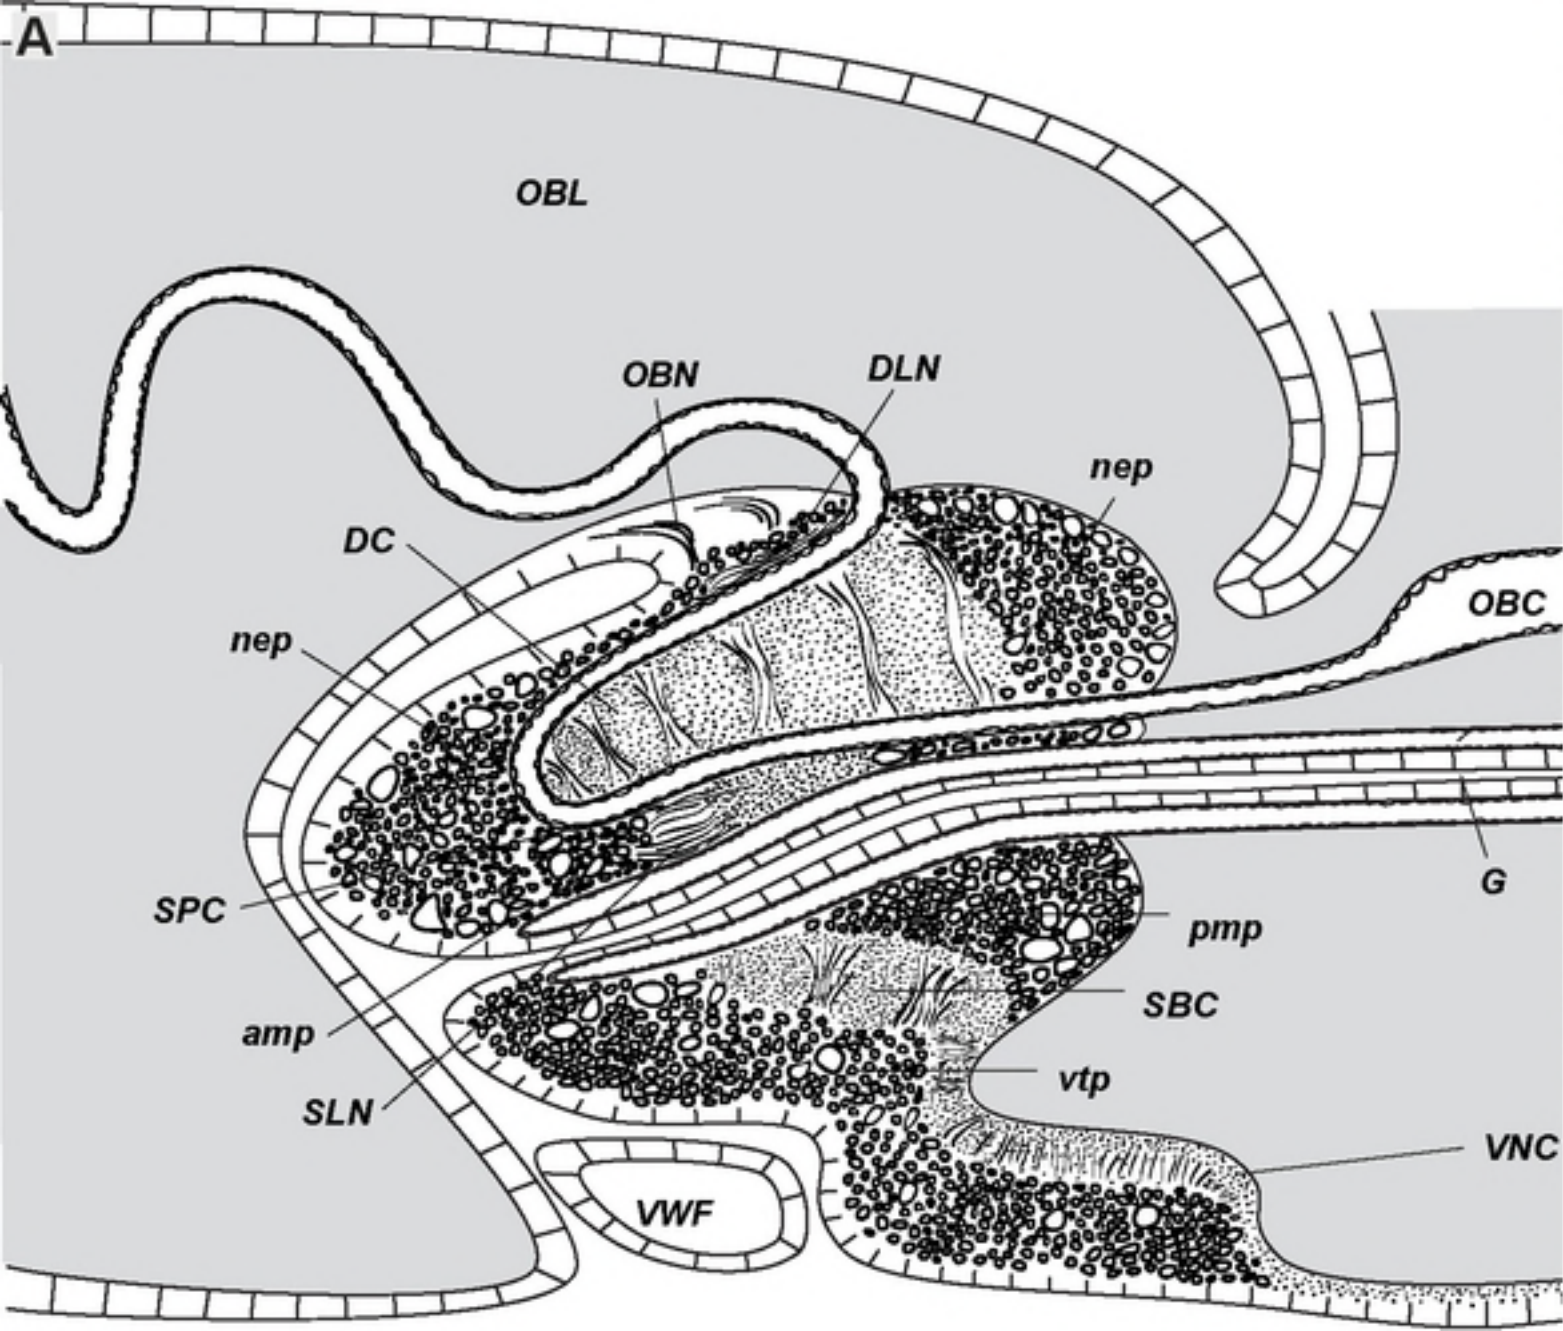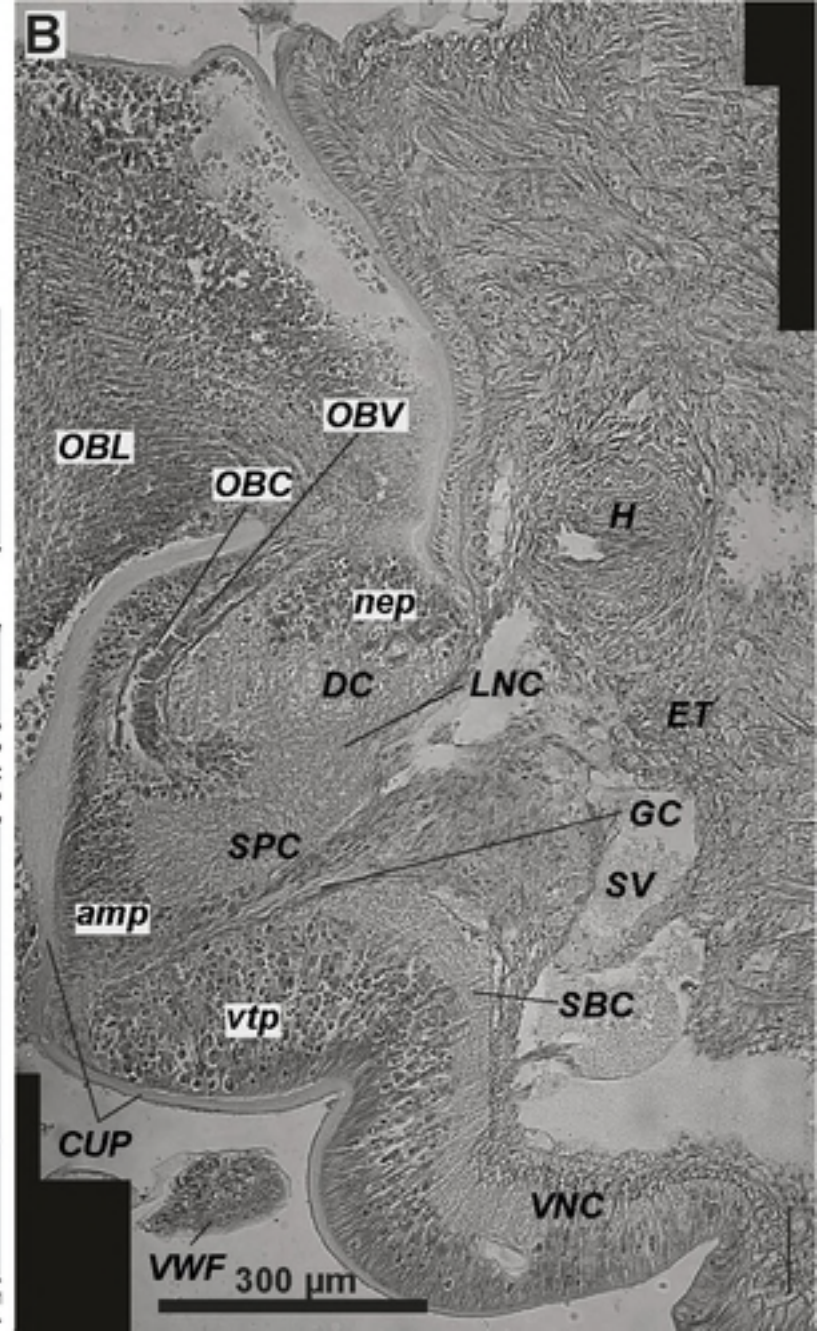



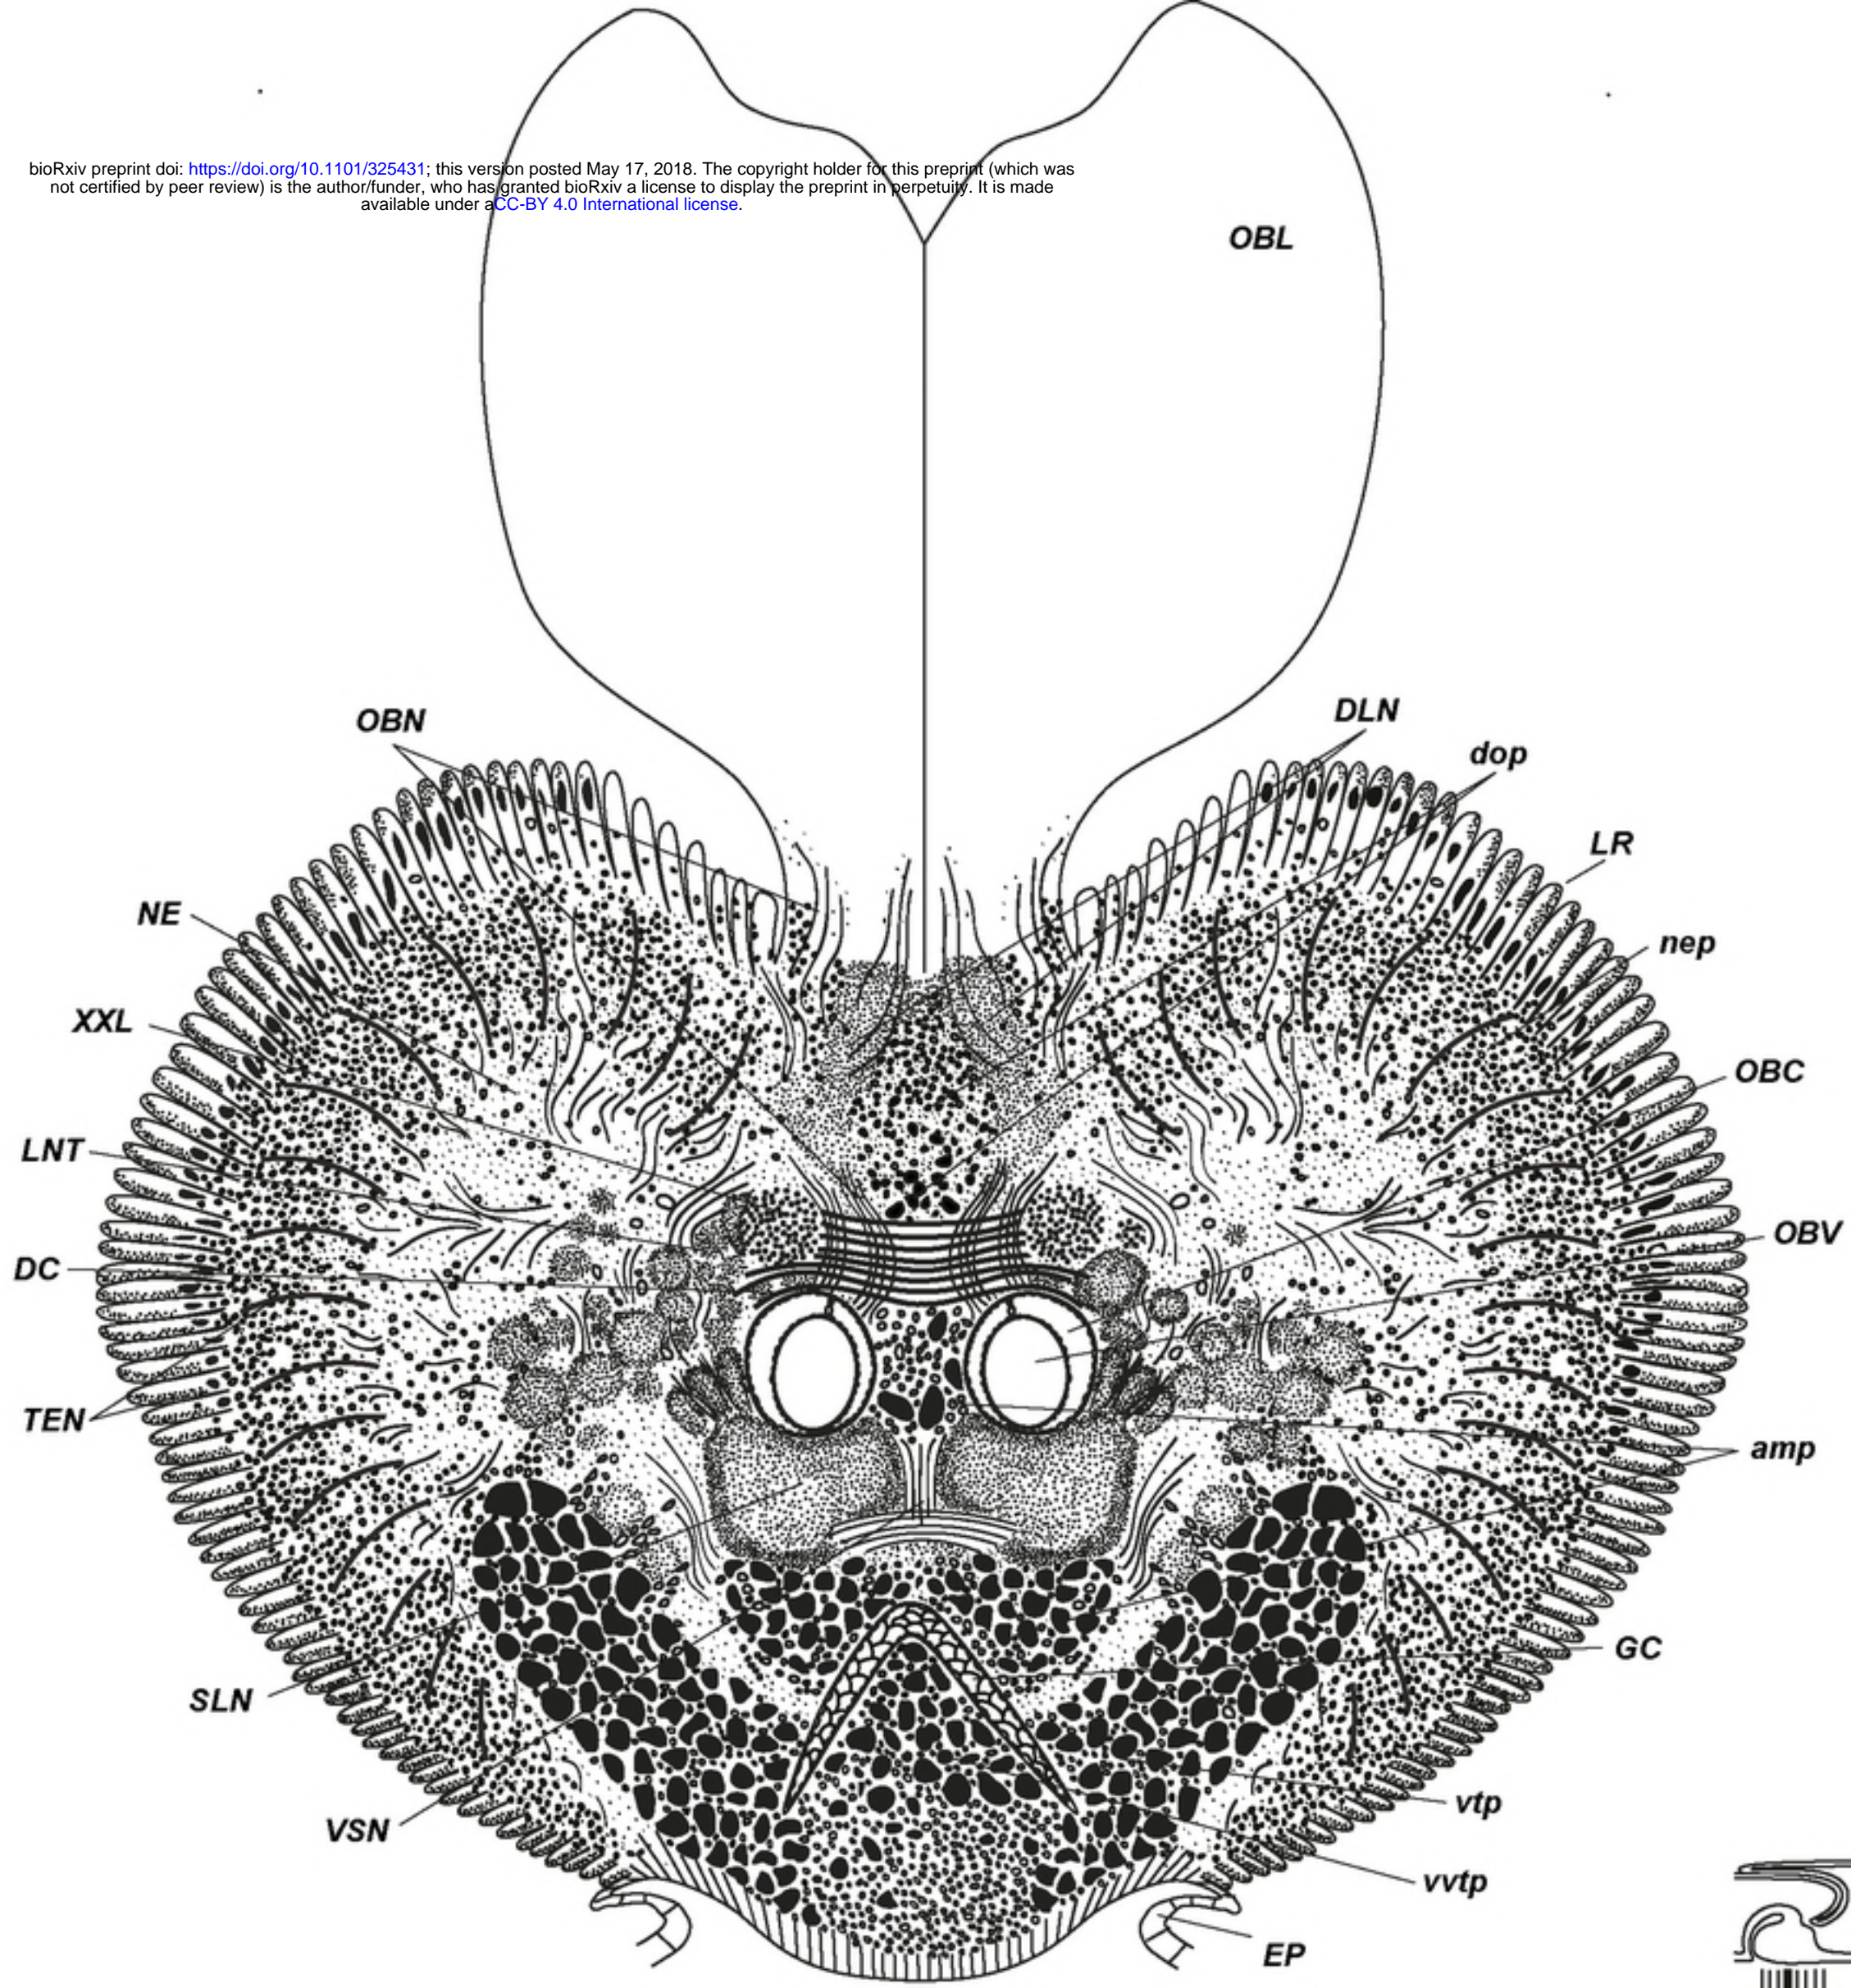



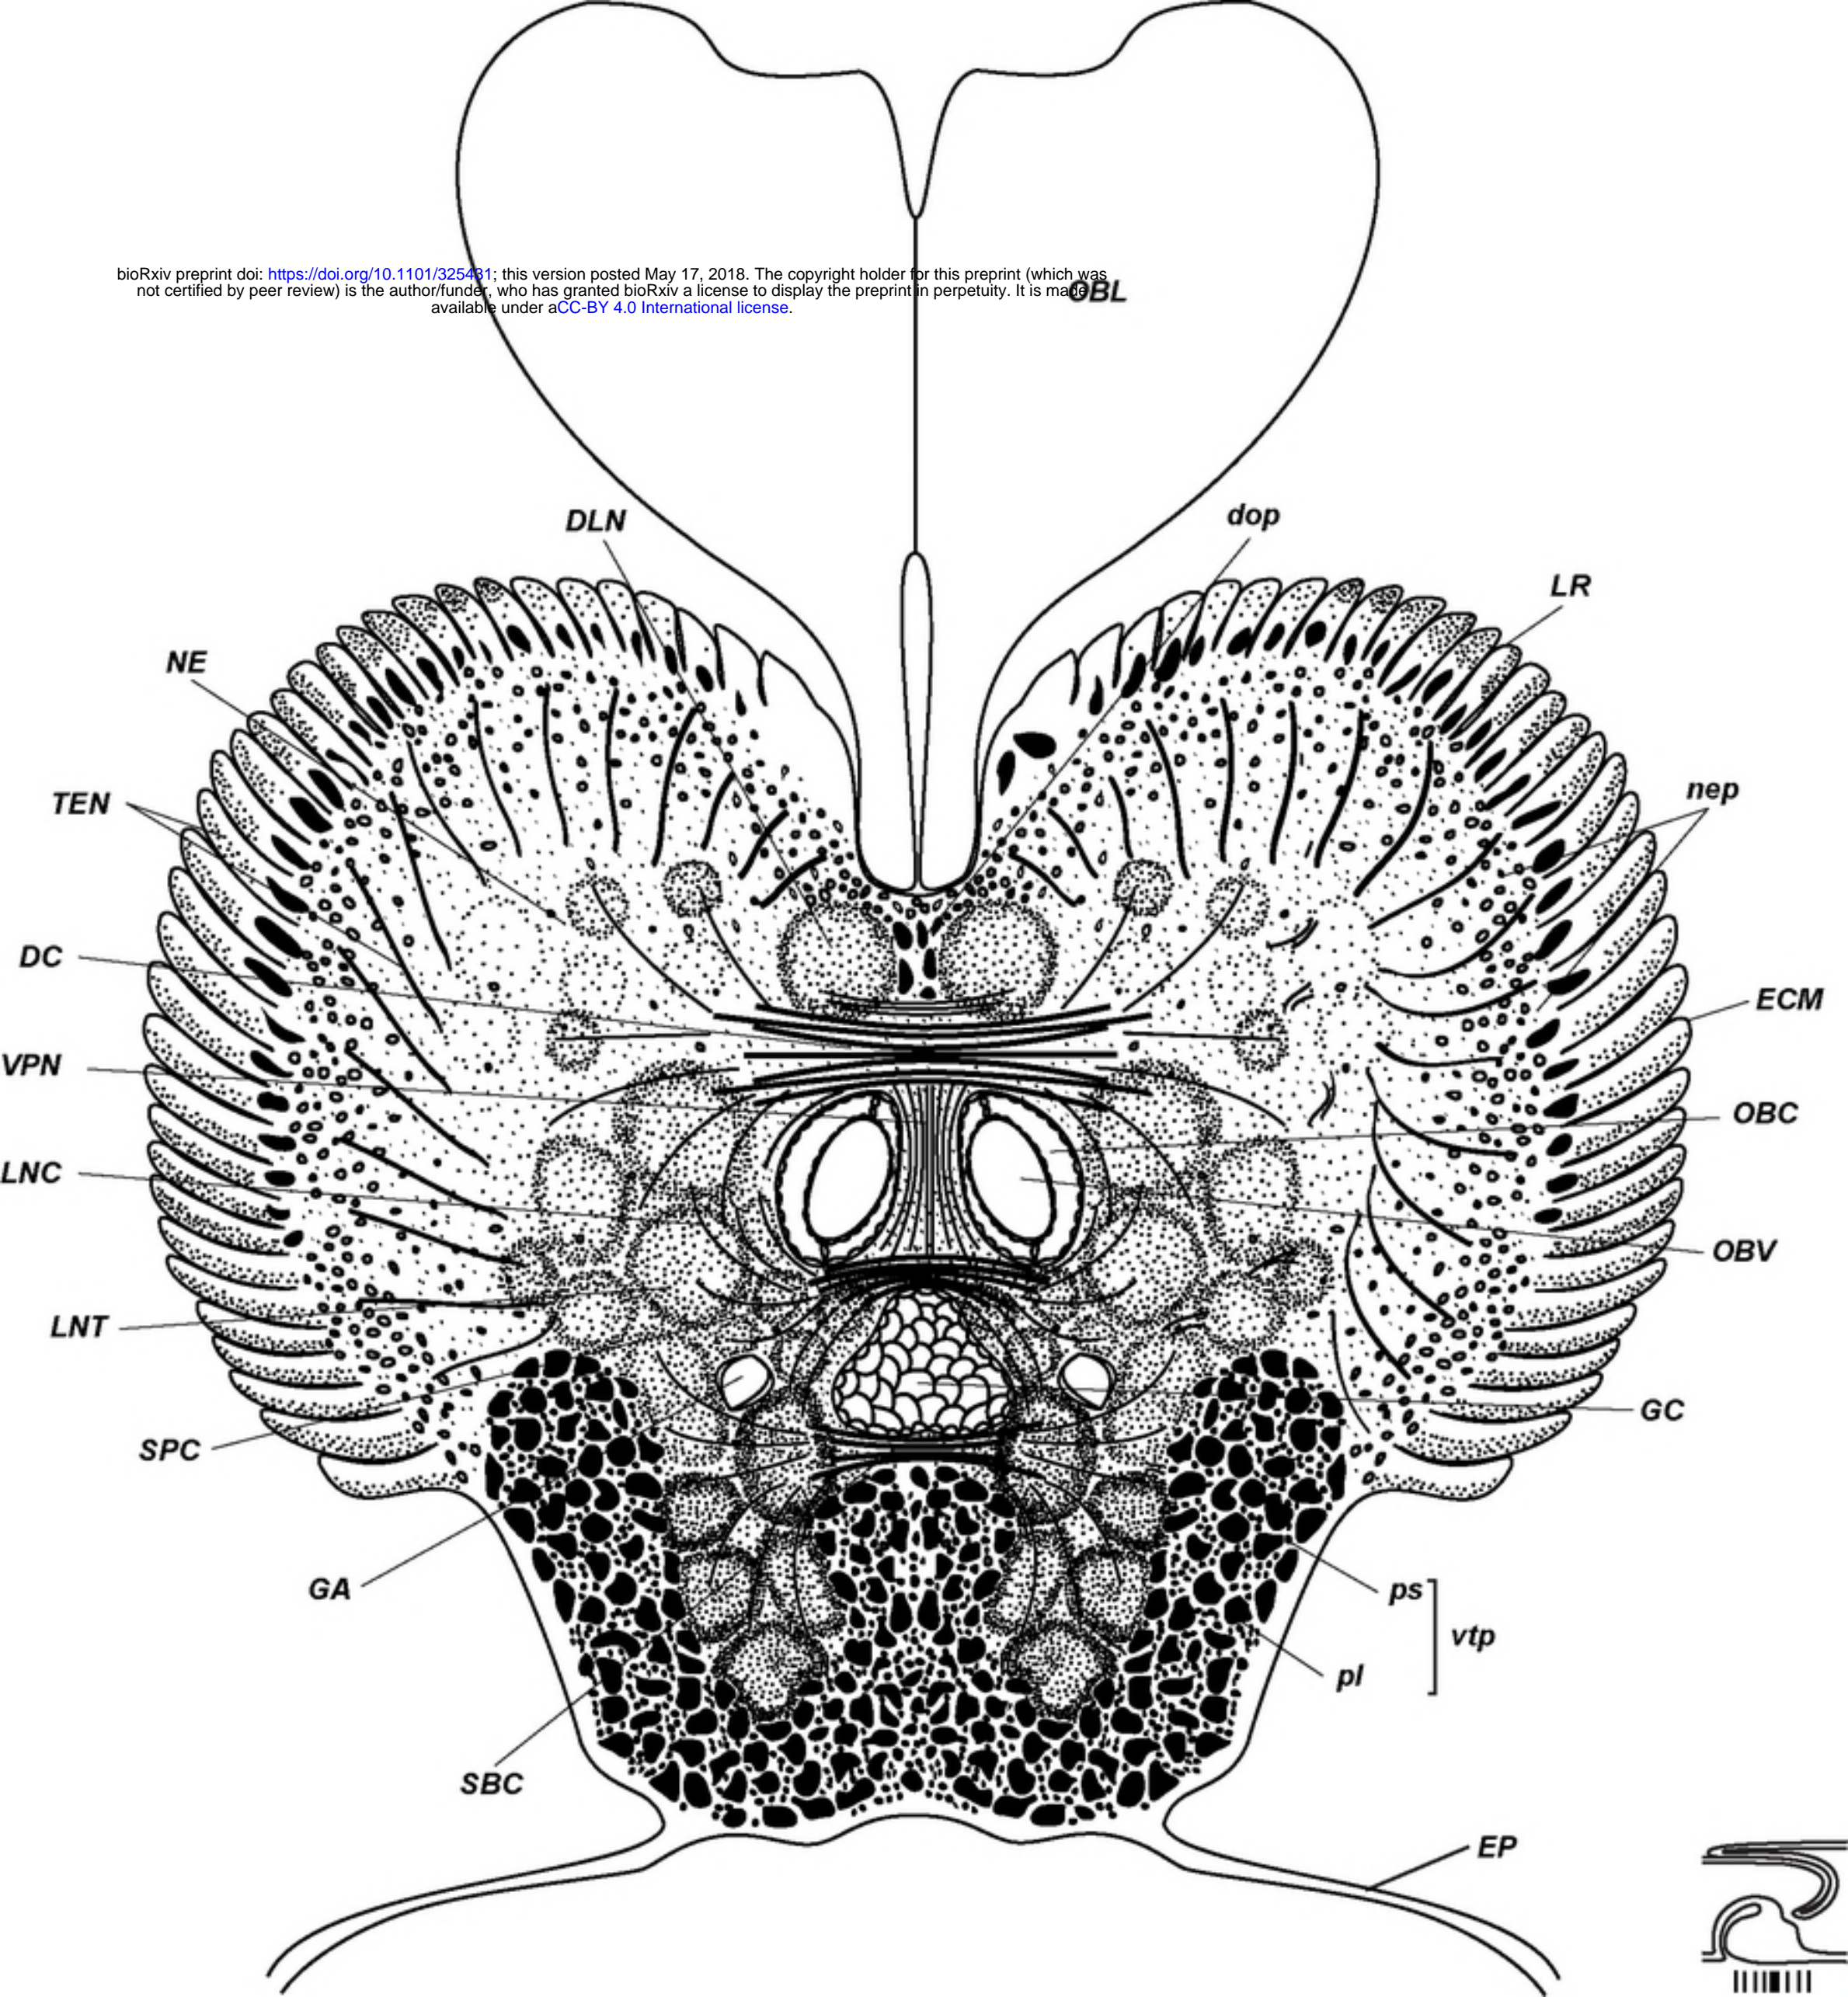



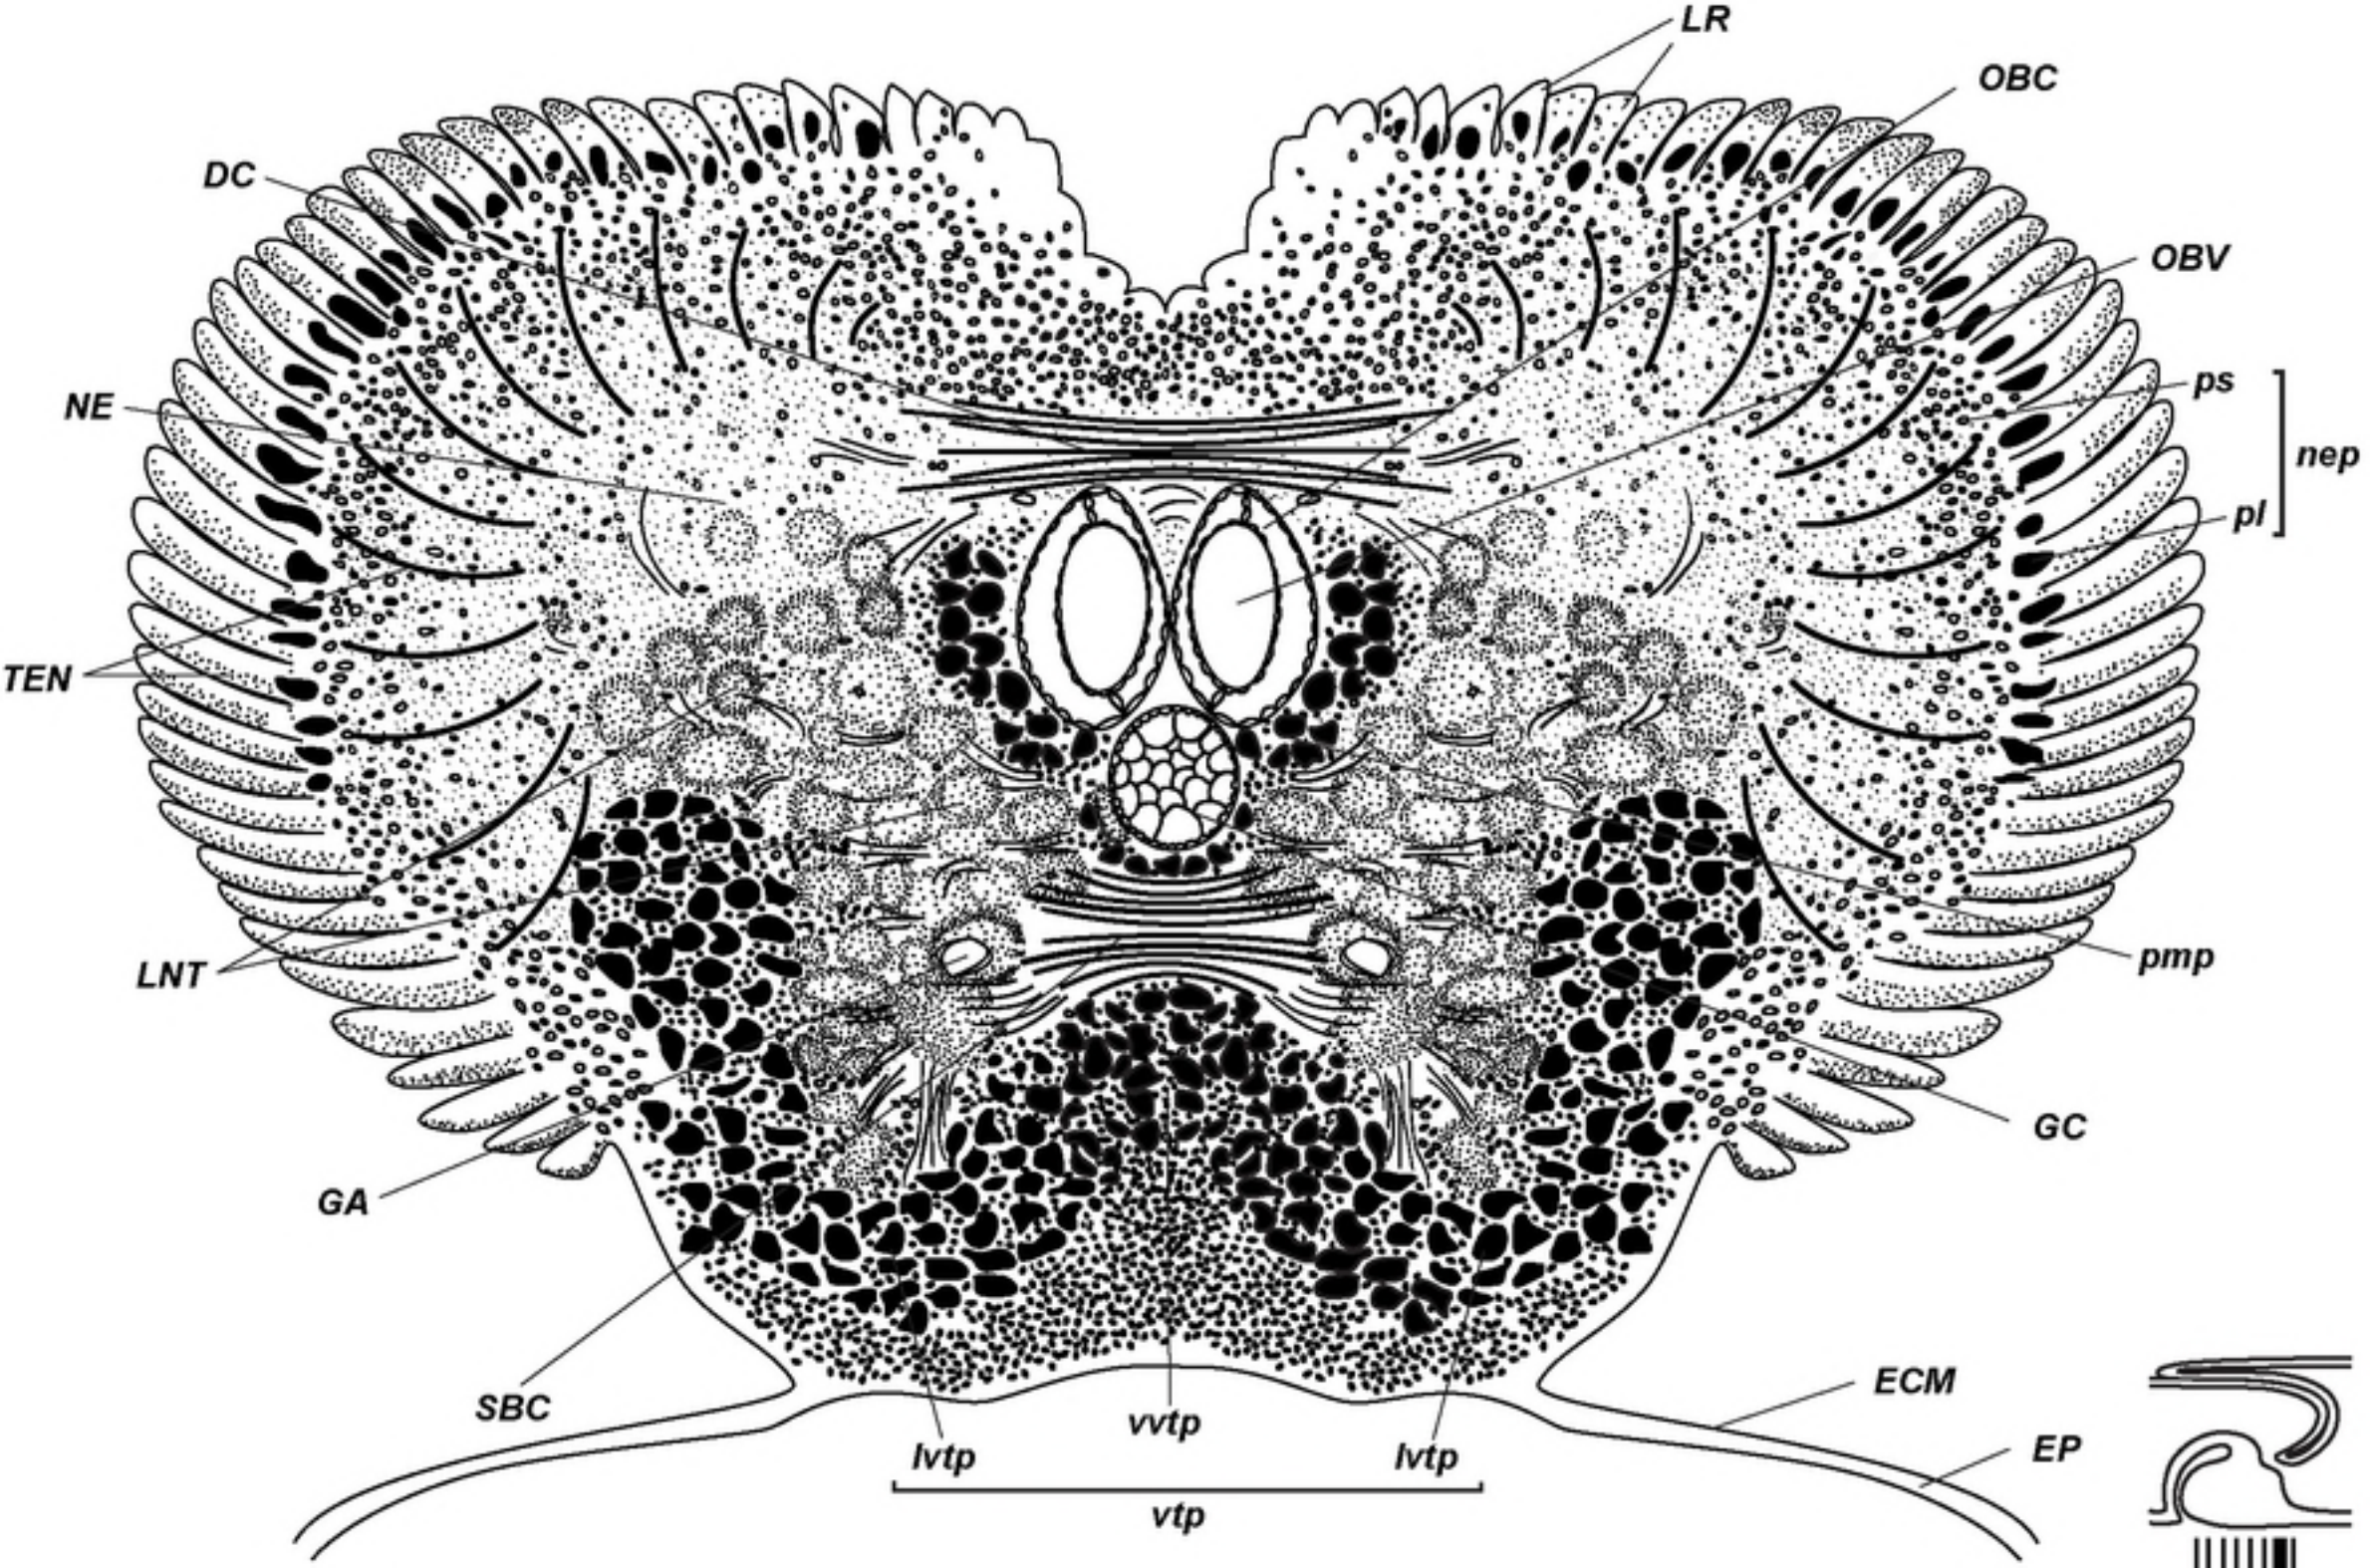



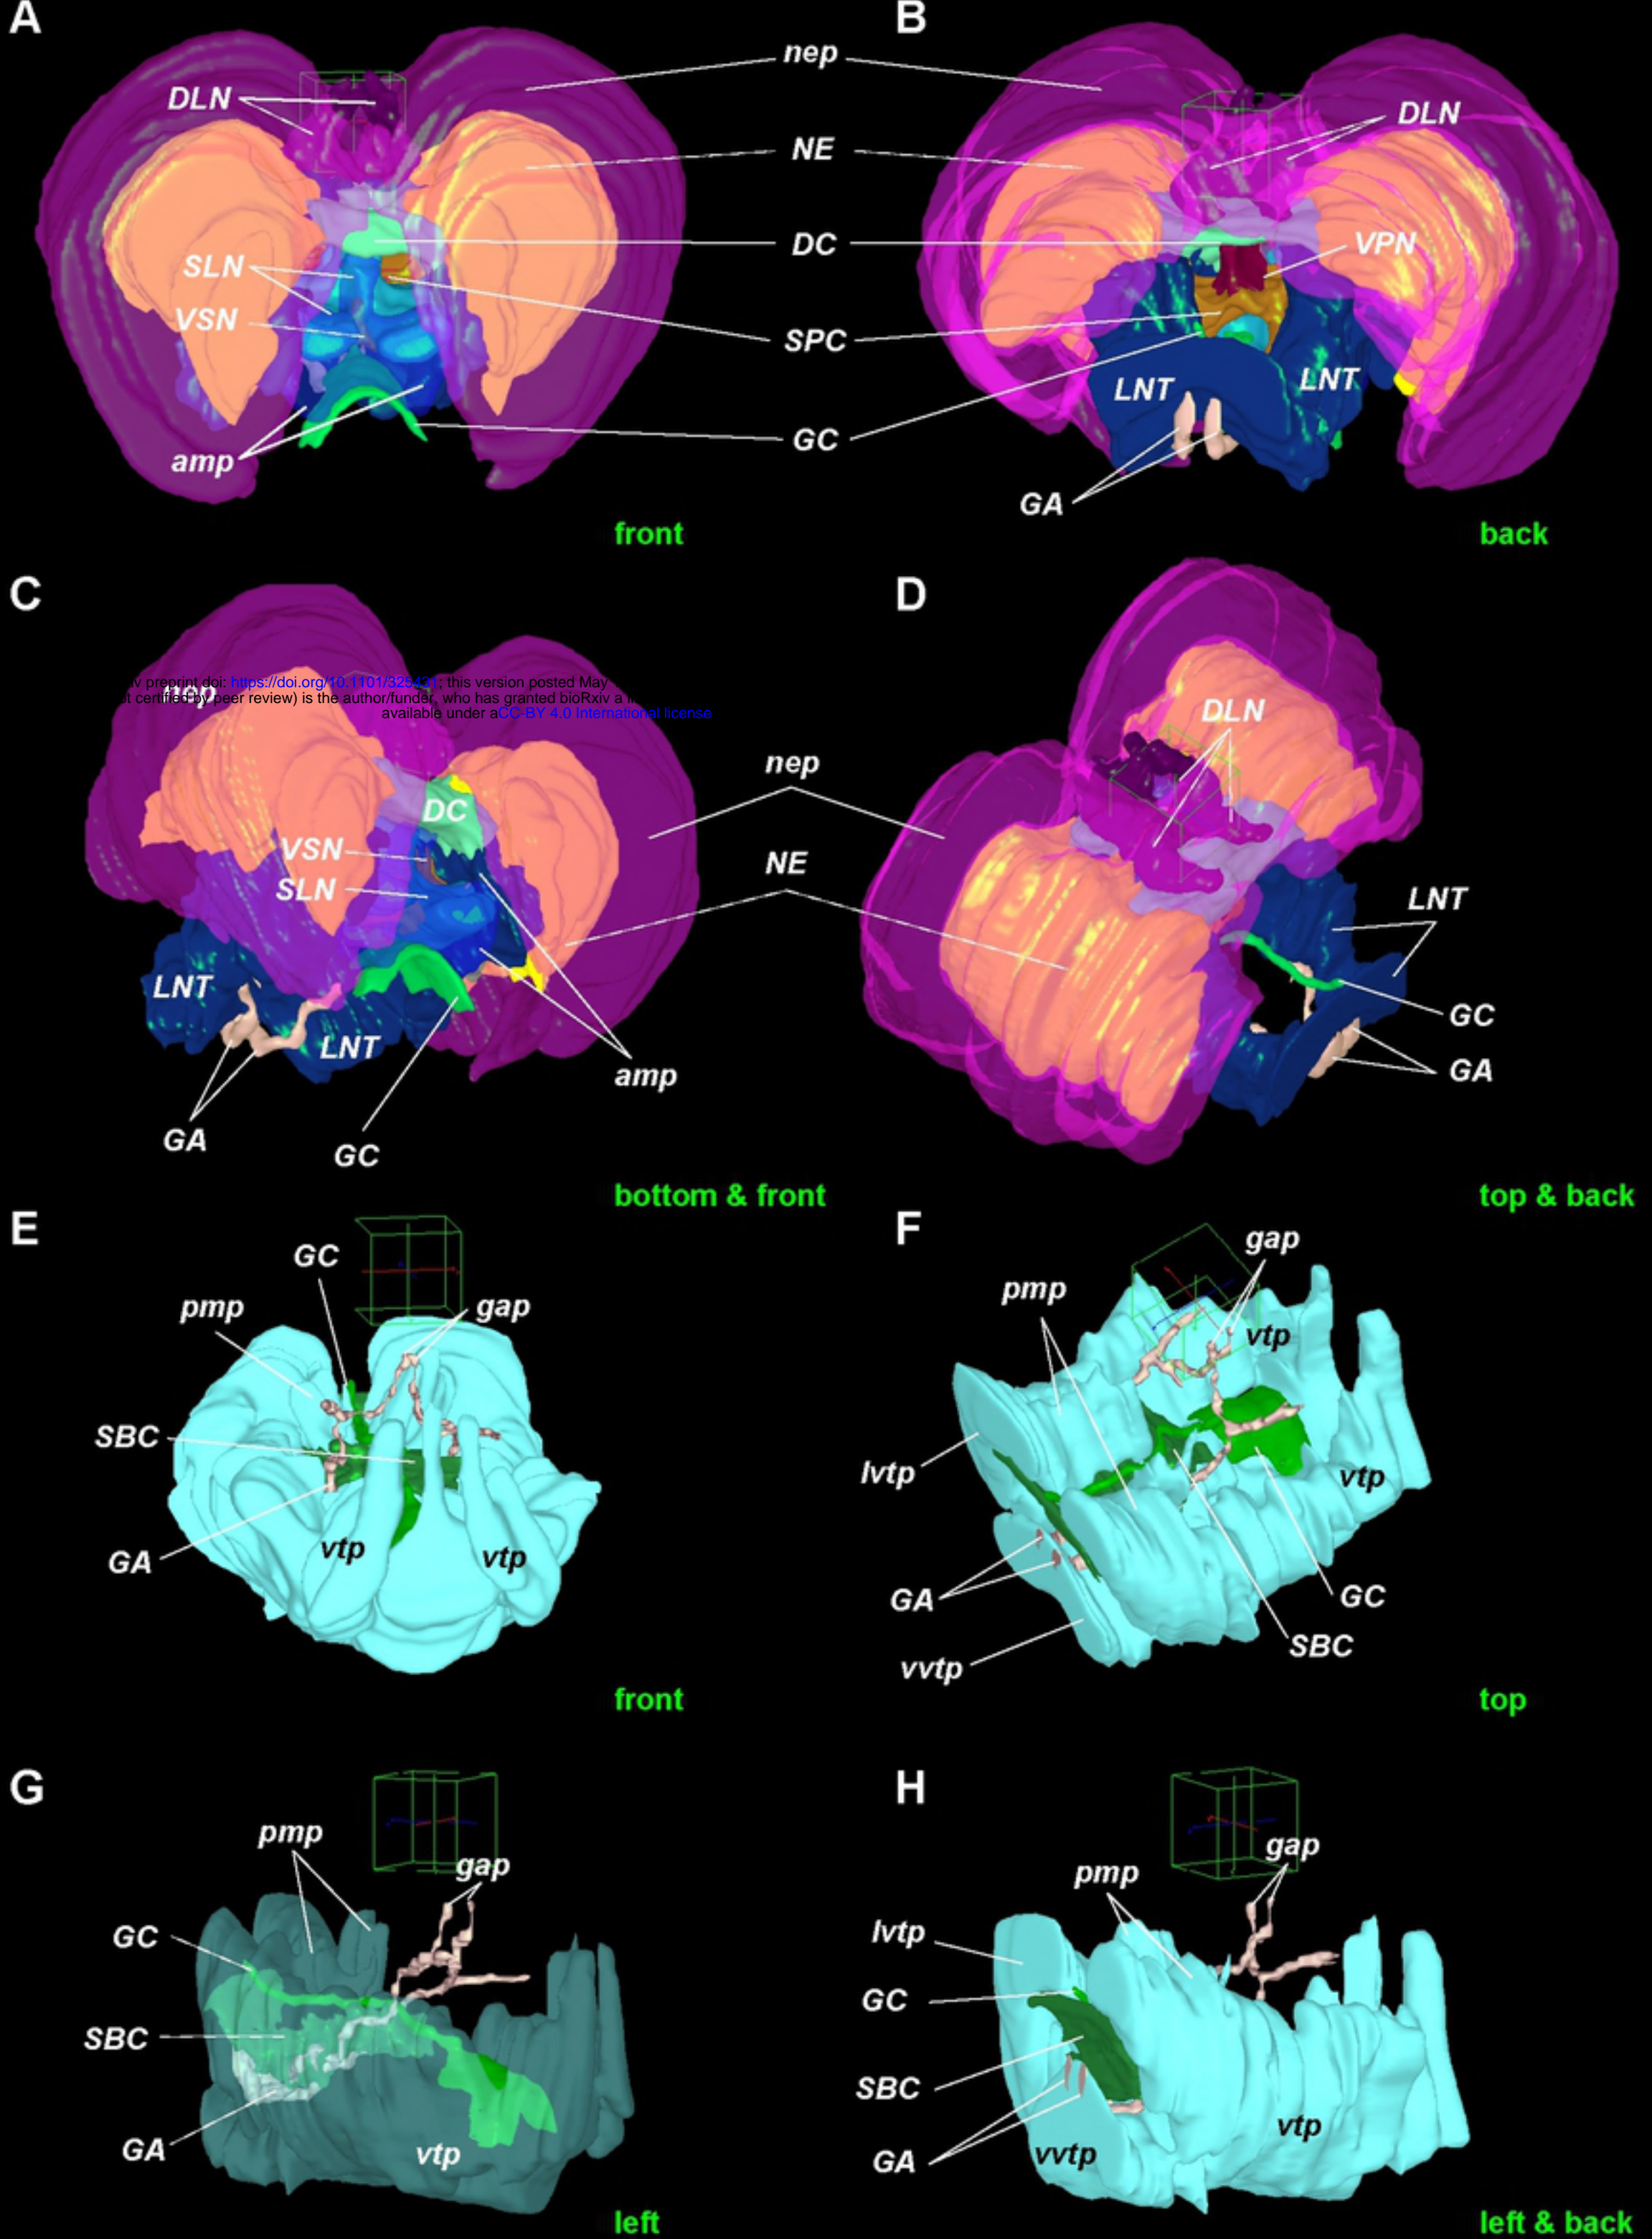



**A**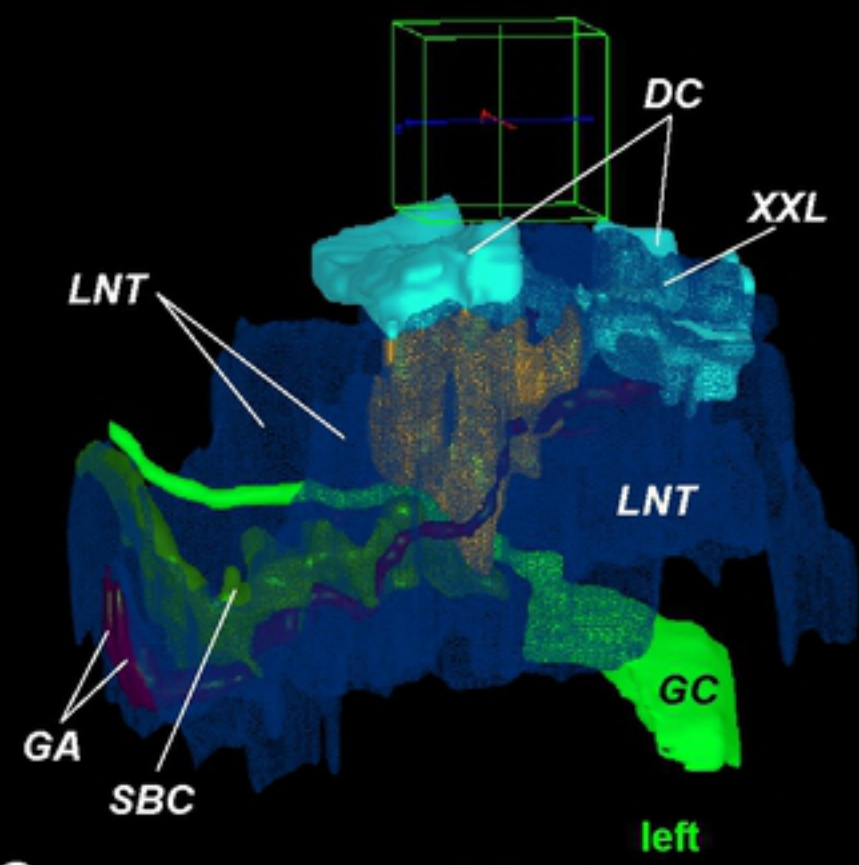**B**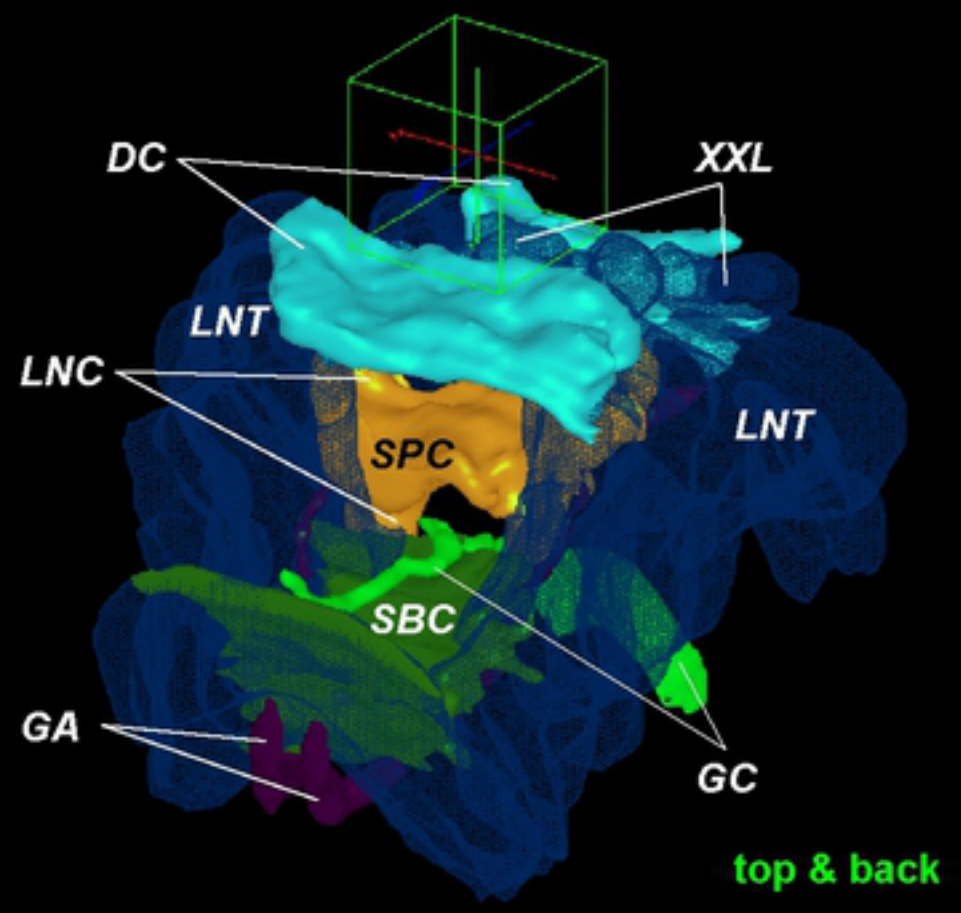**C**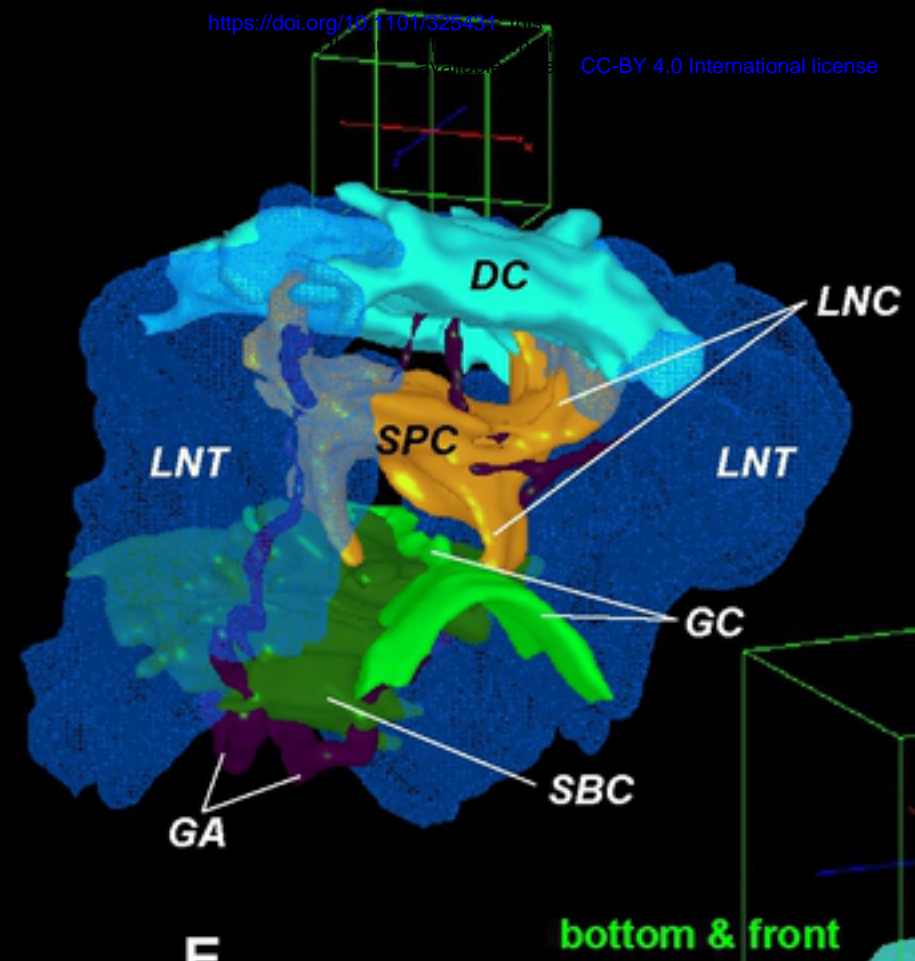**D**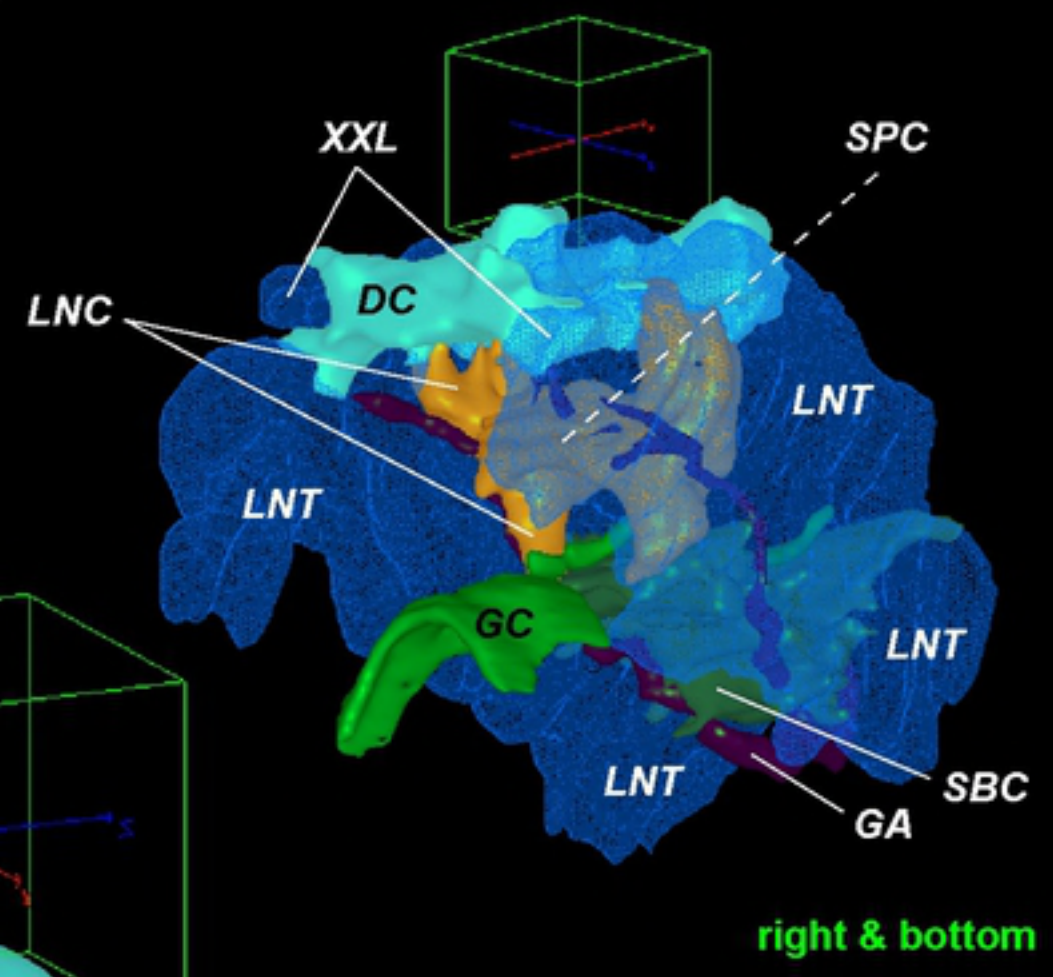**E**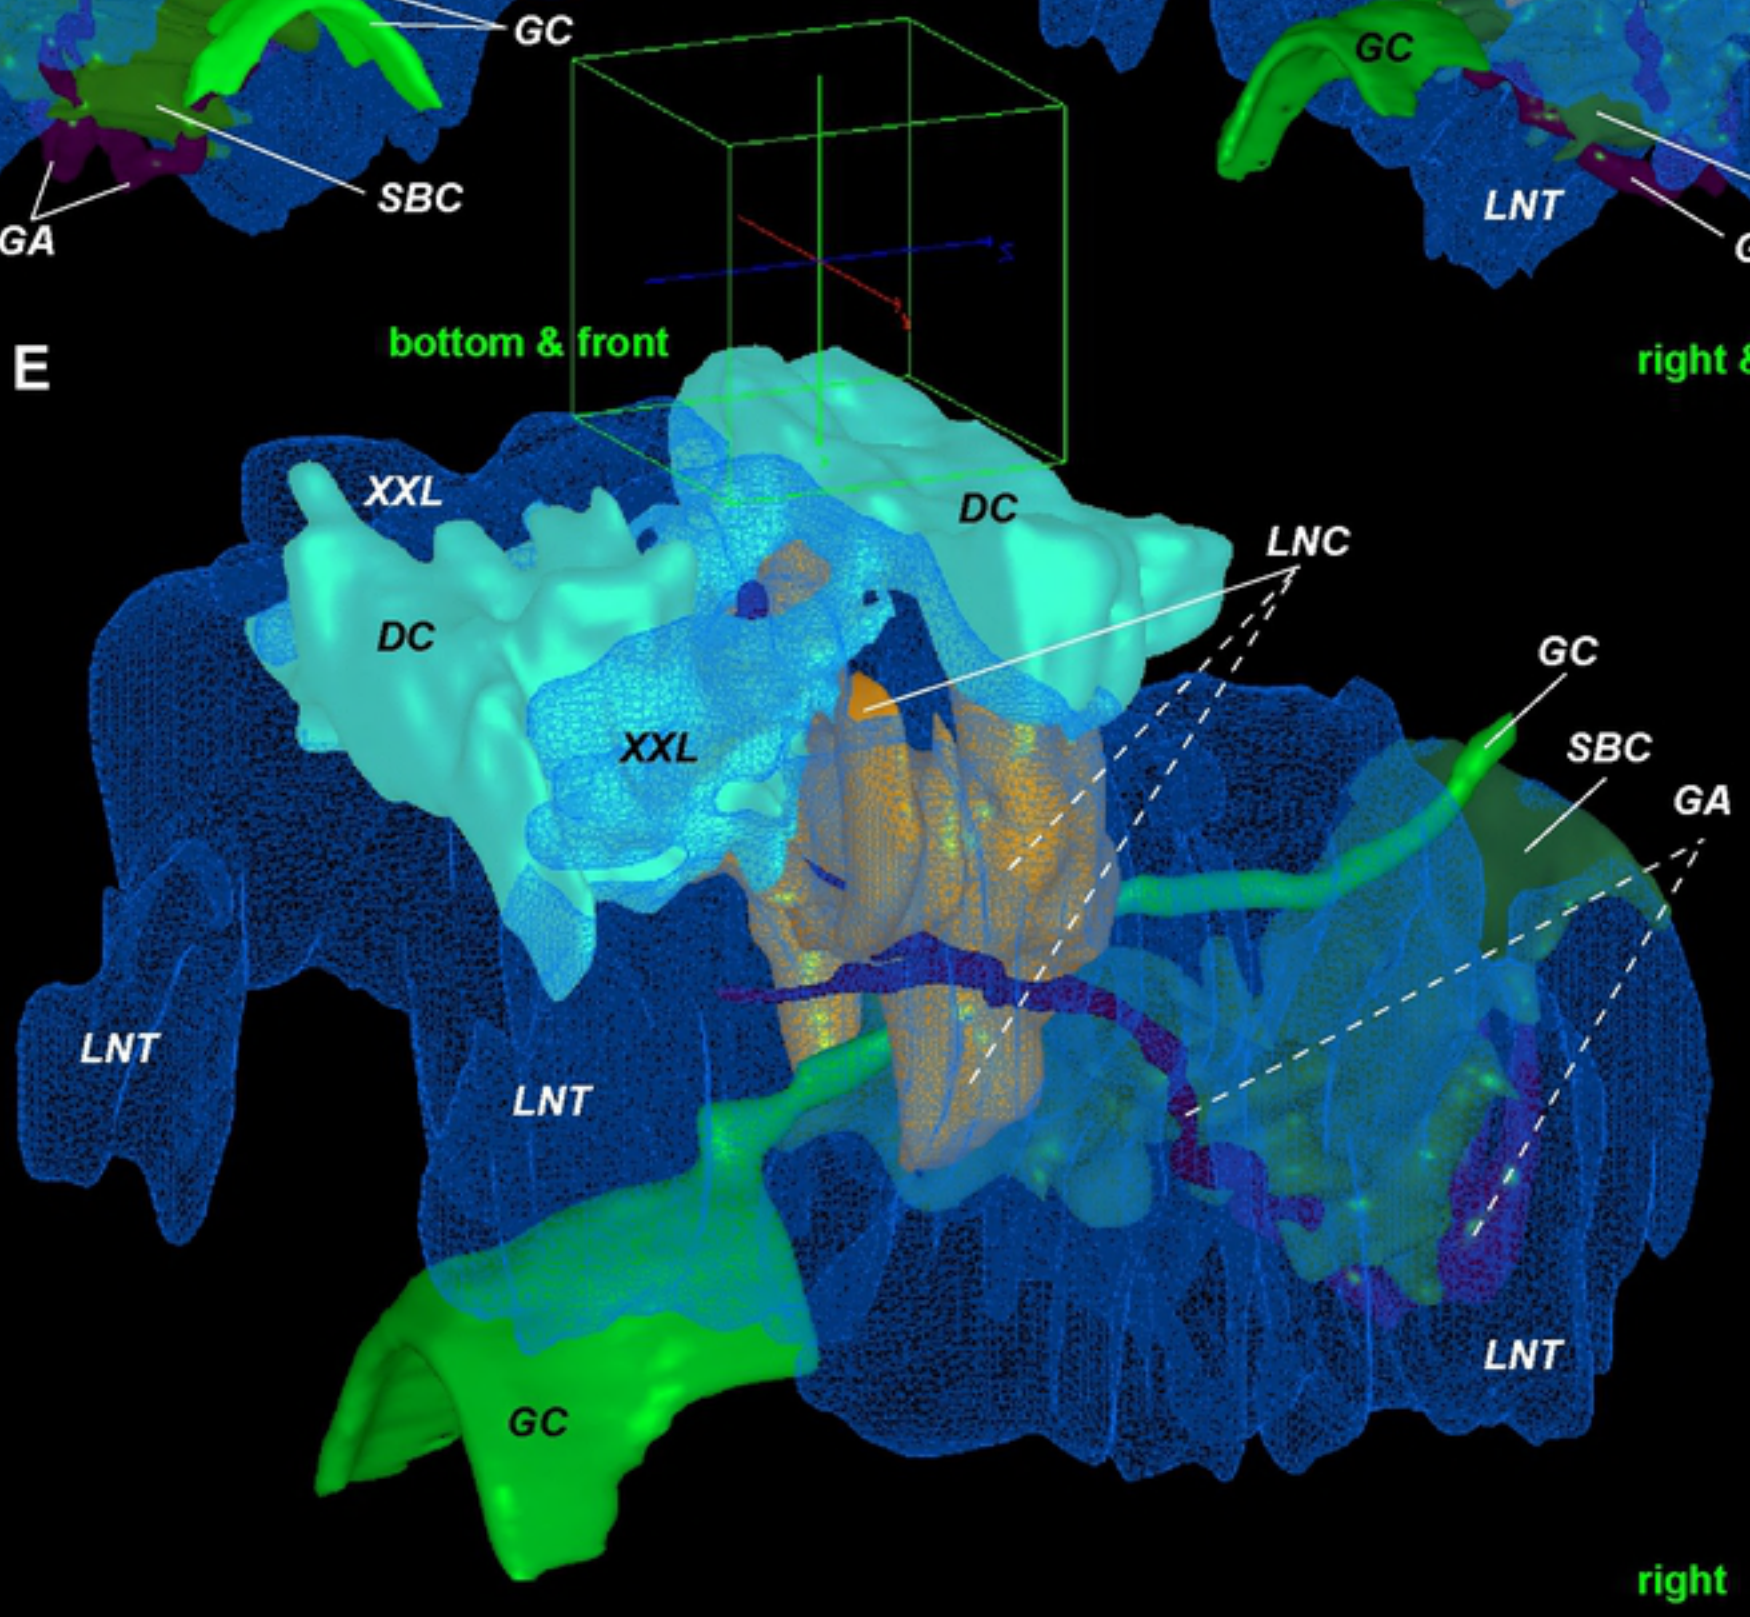



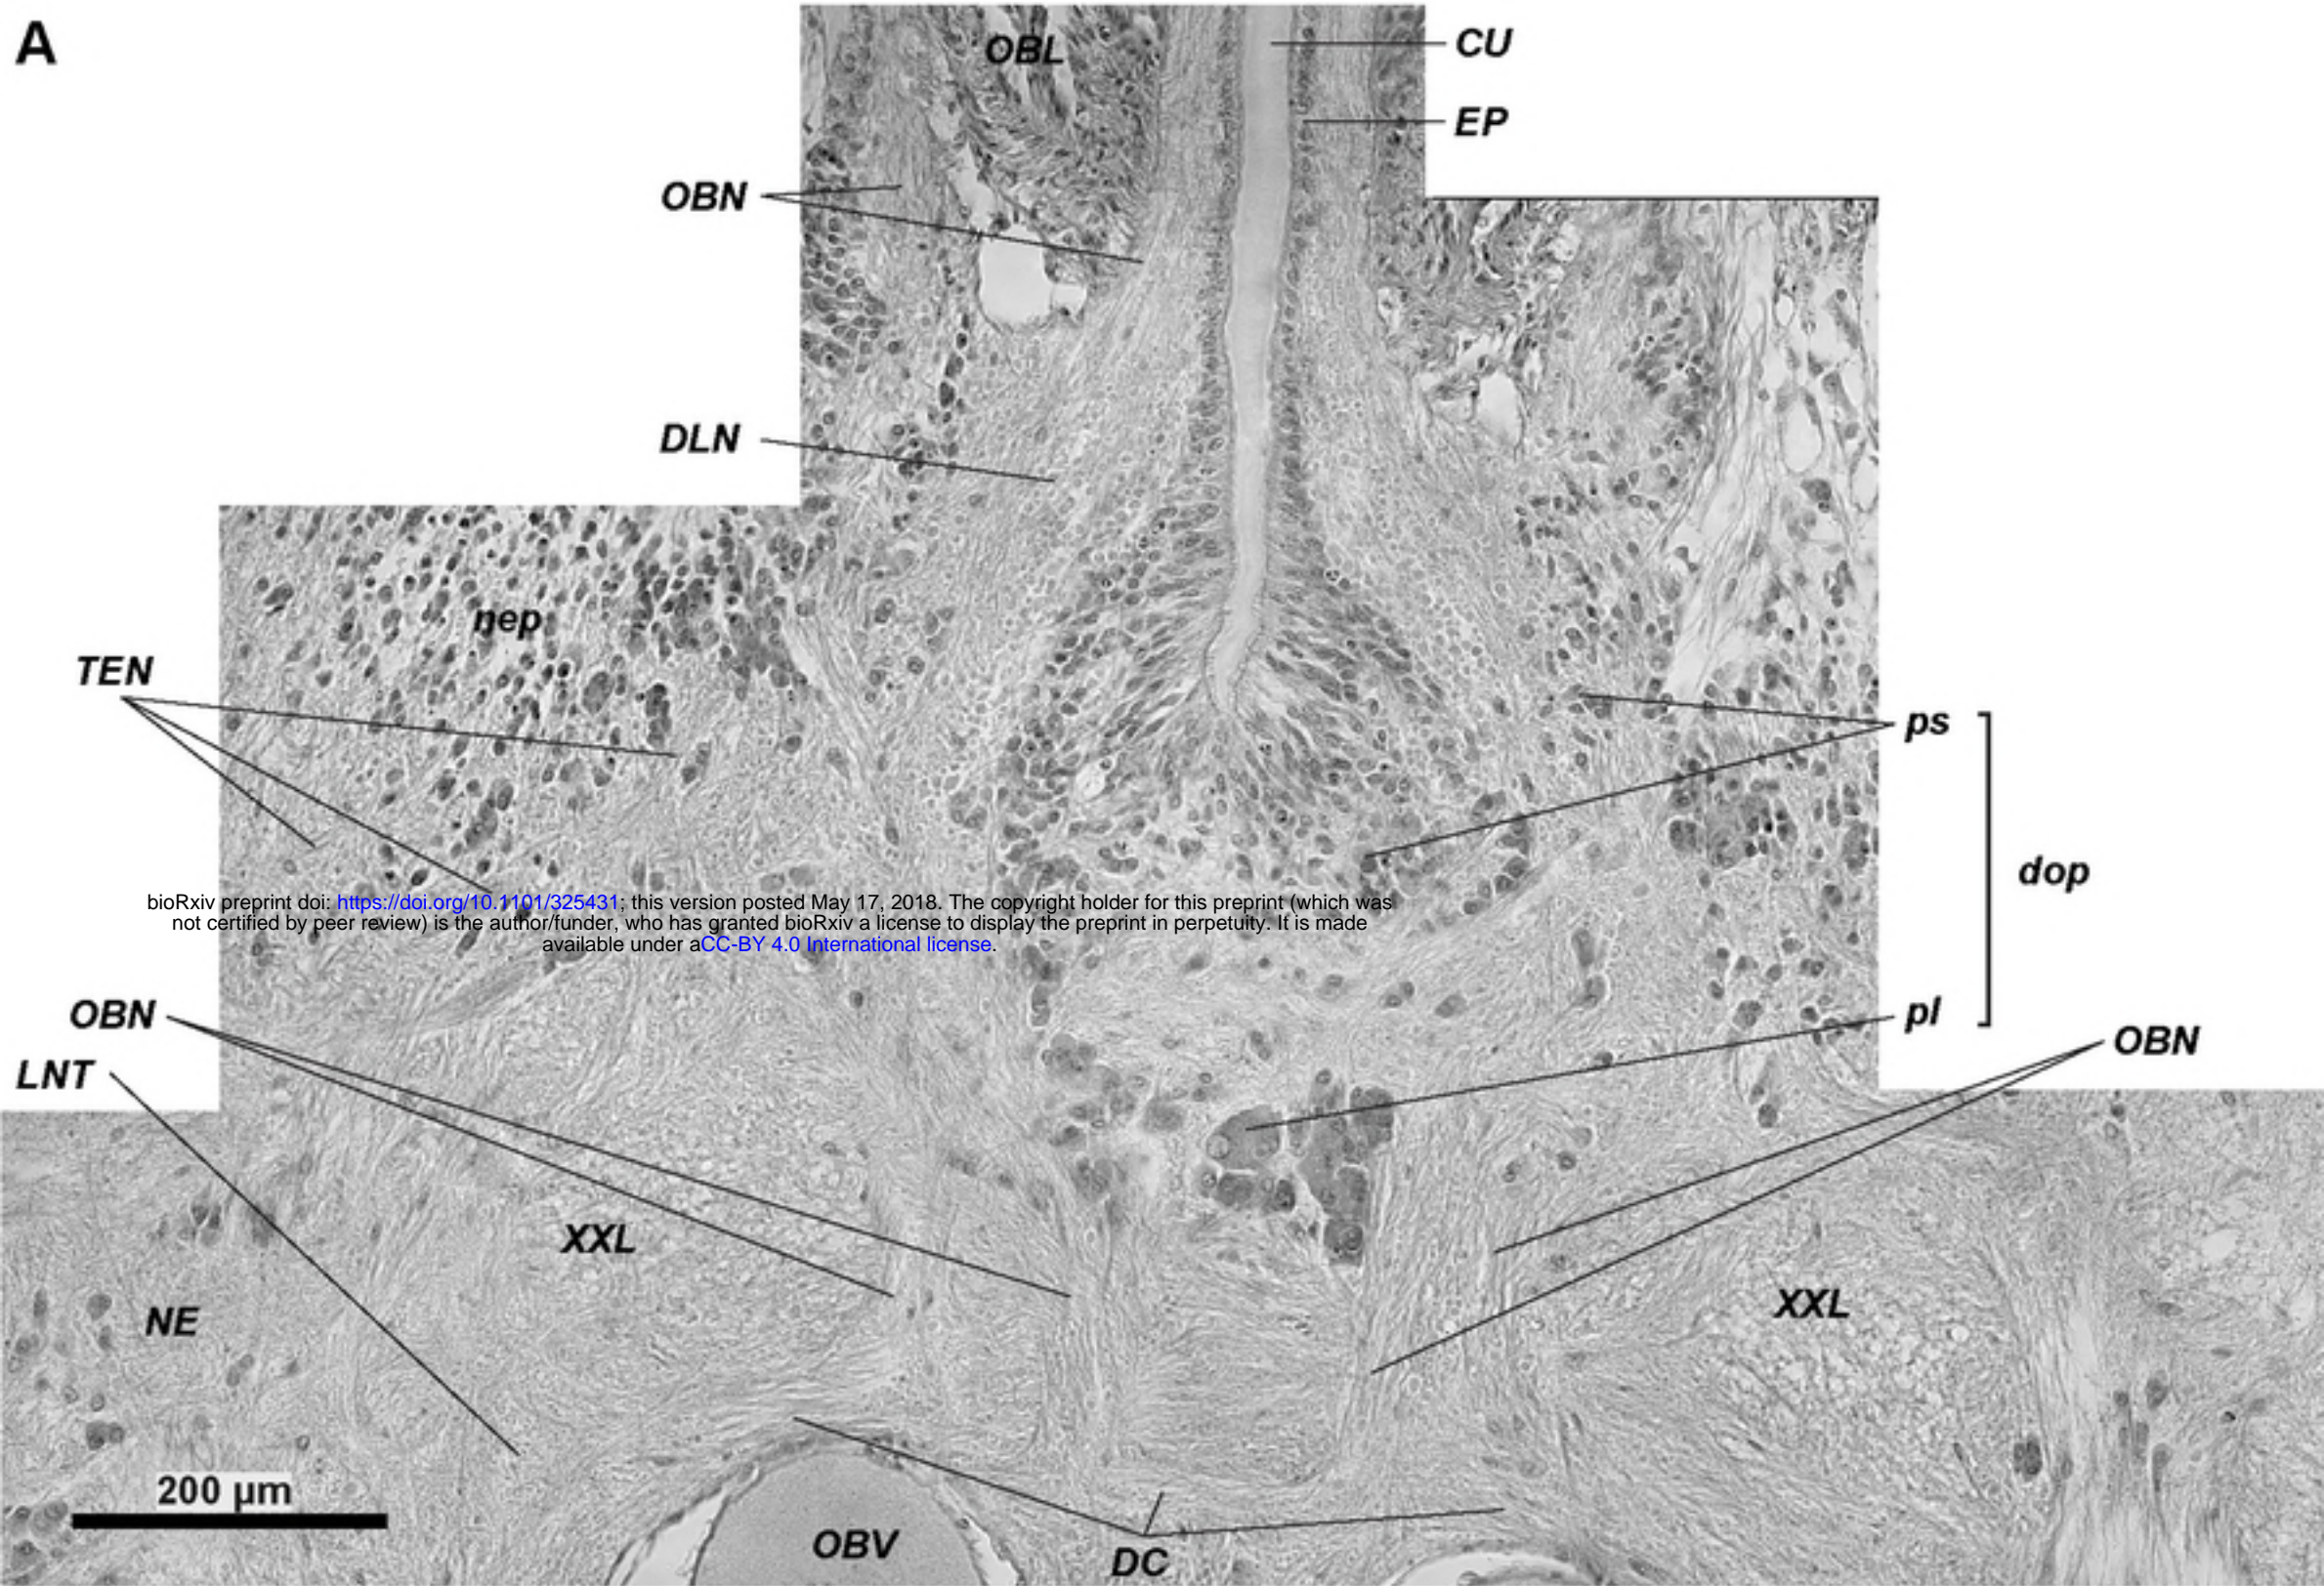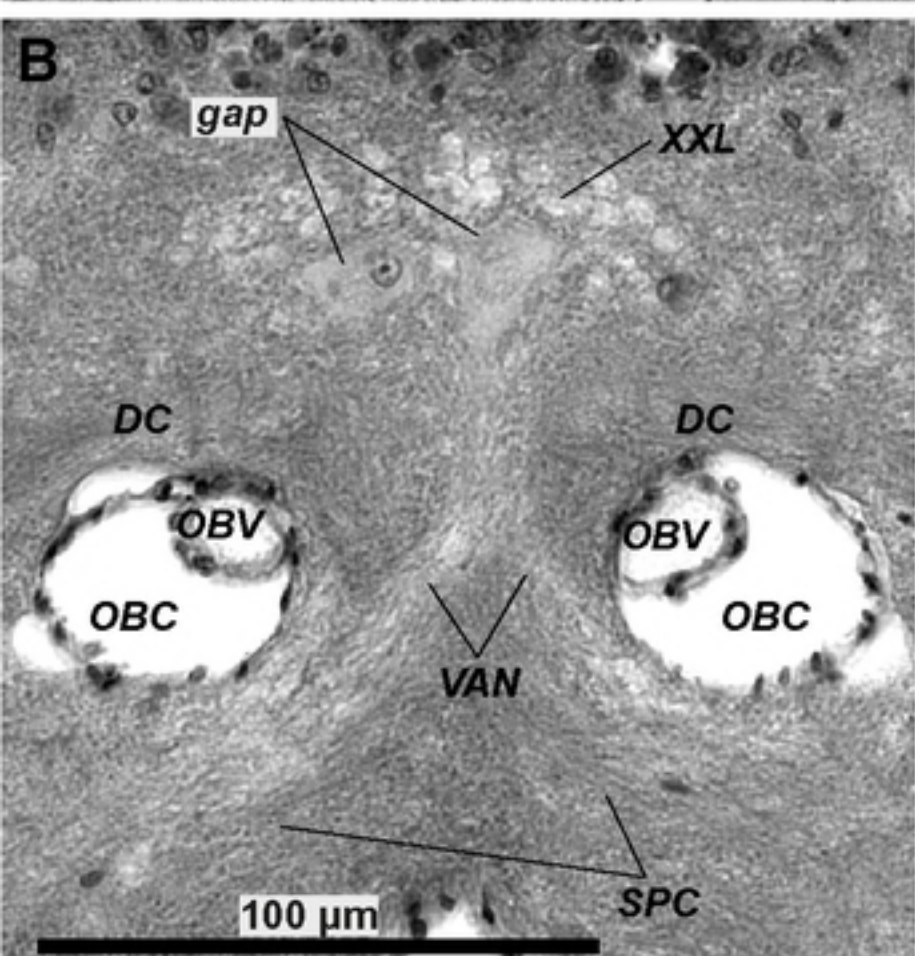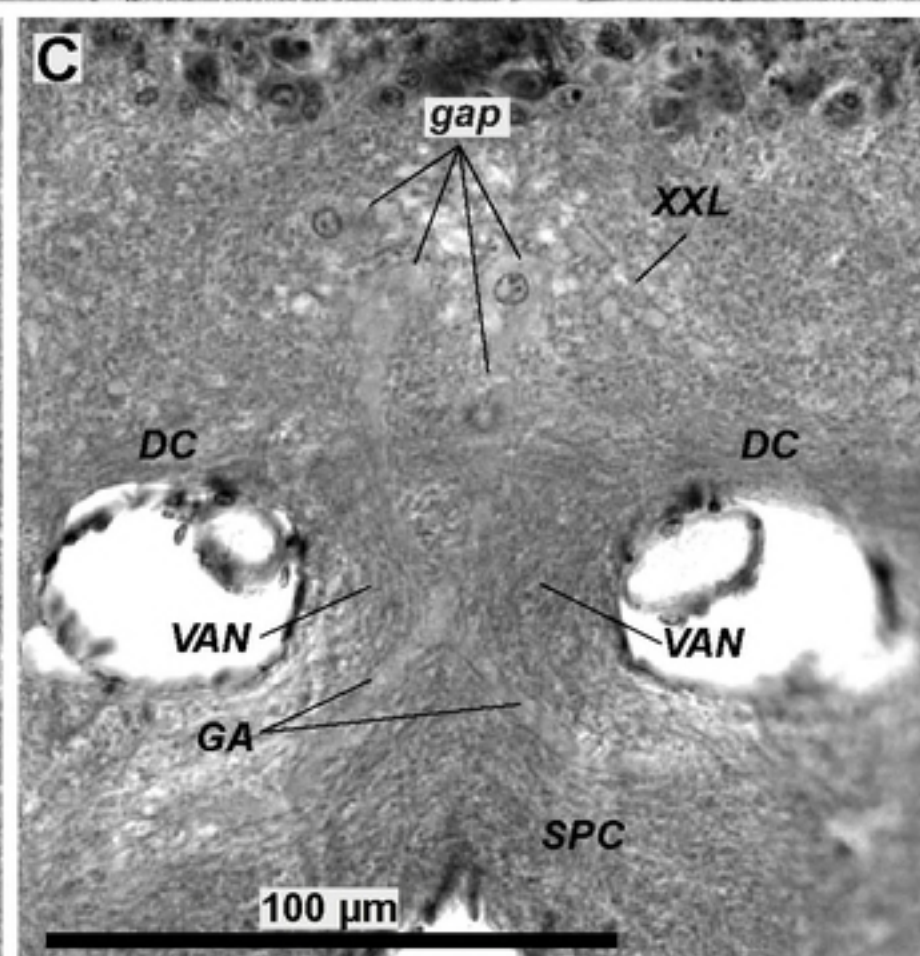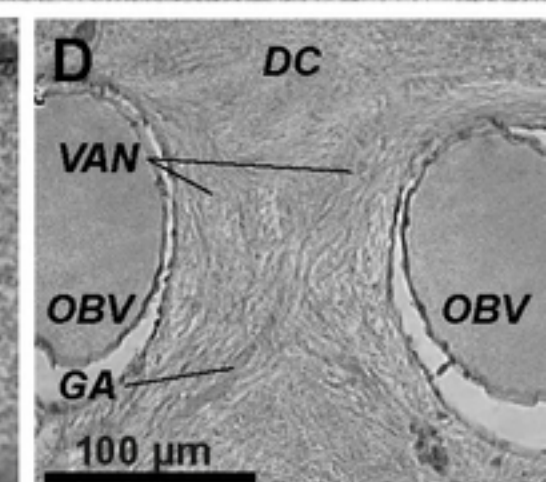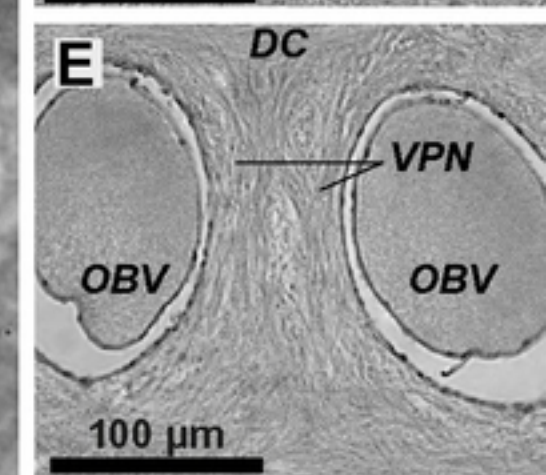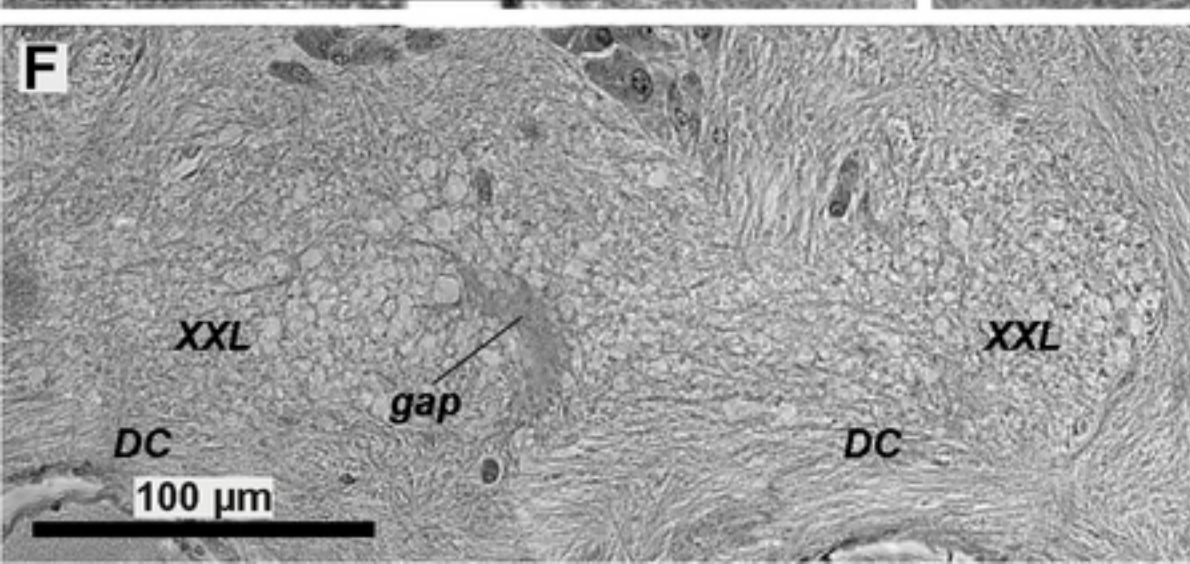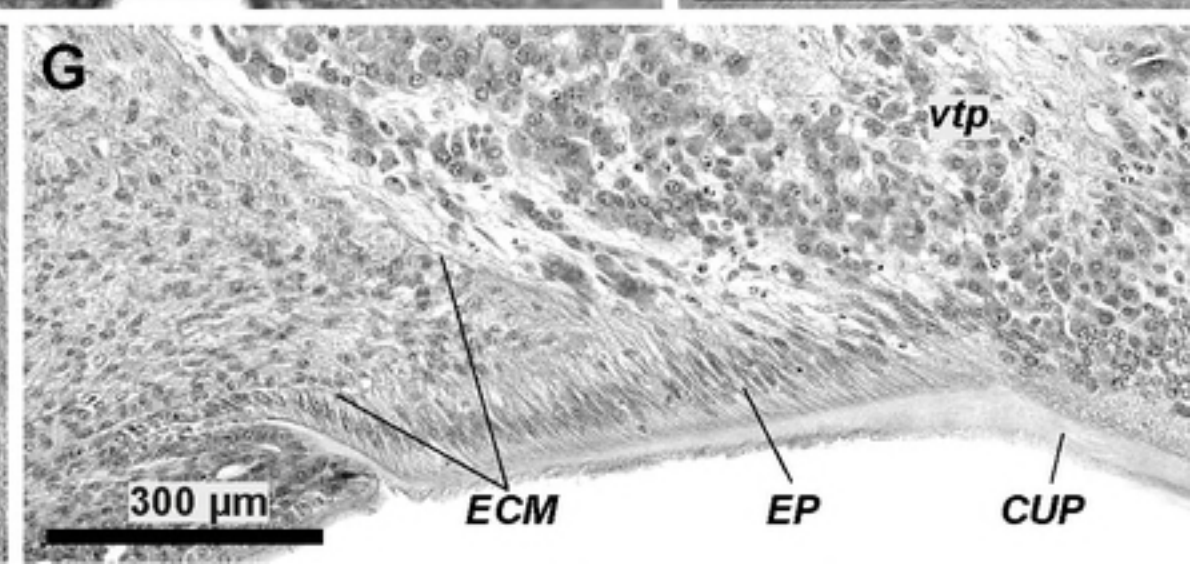



**A**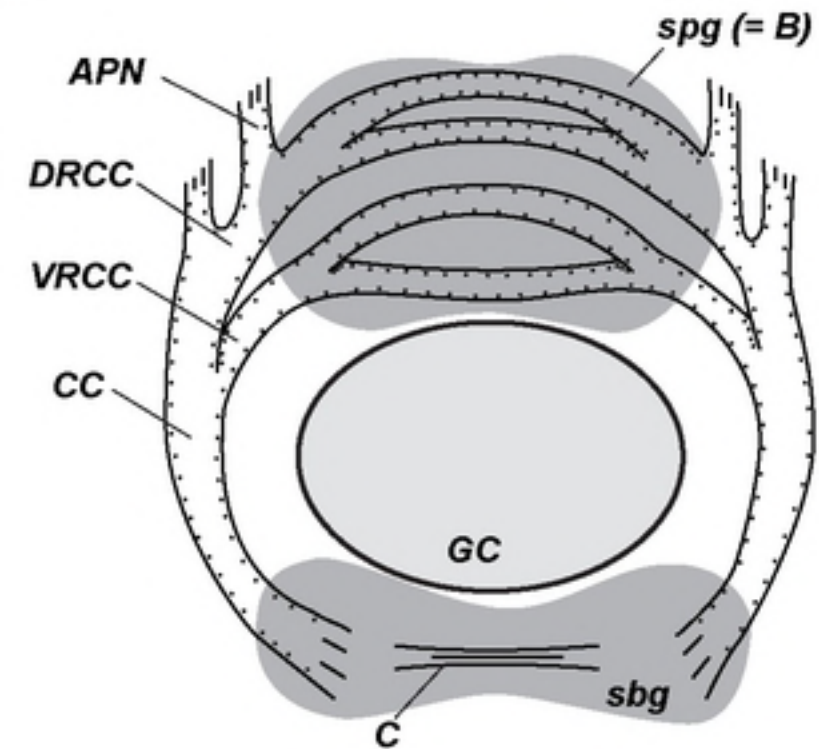**B**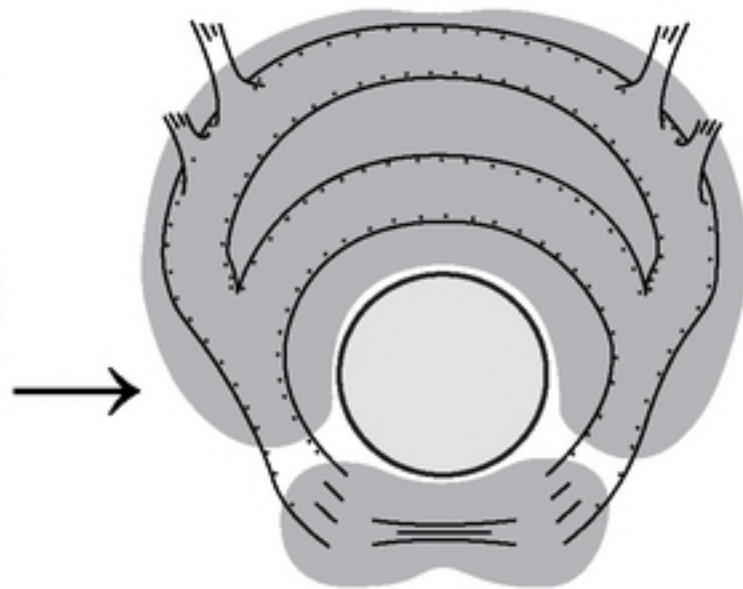**C**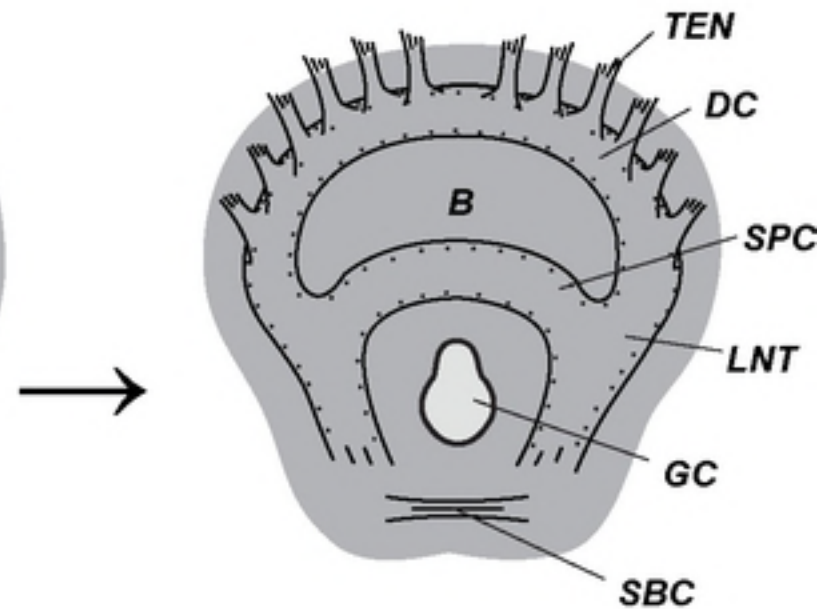

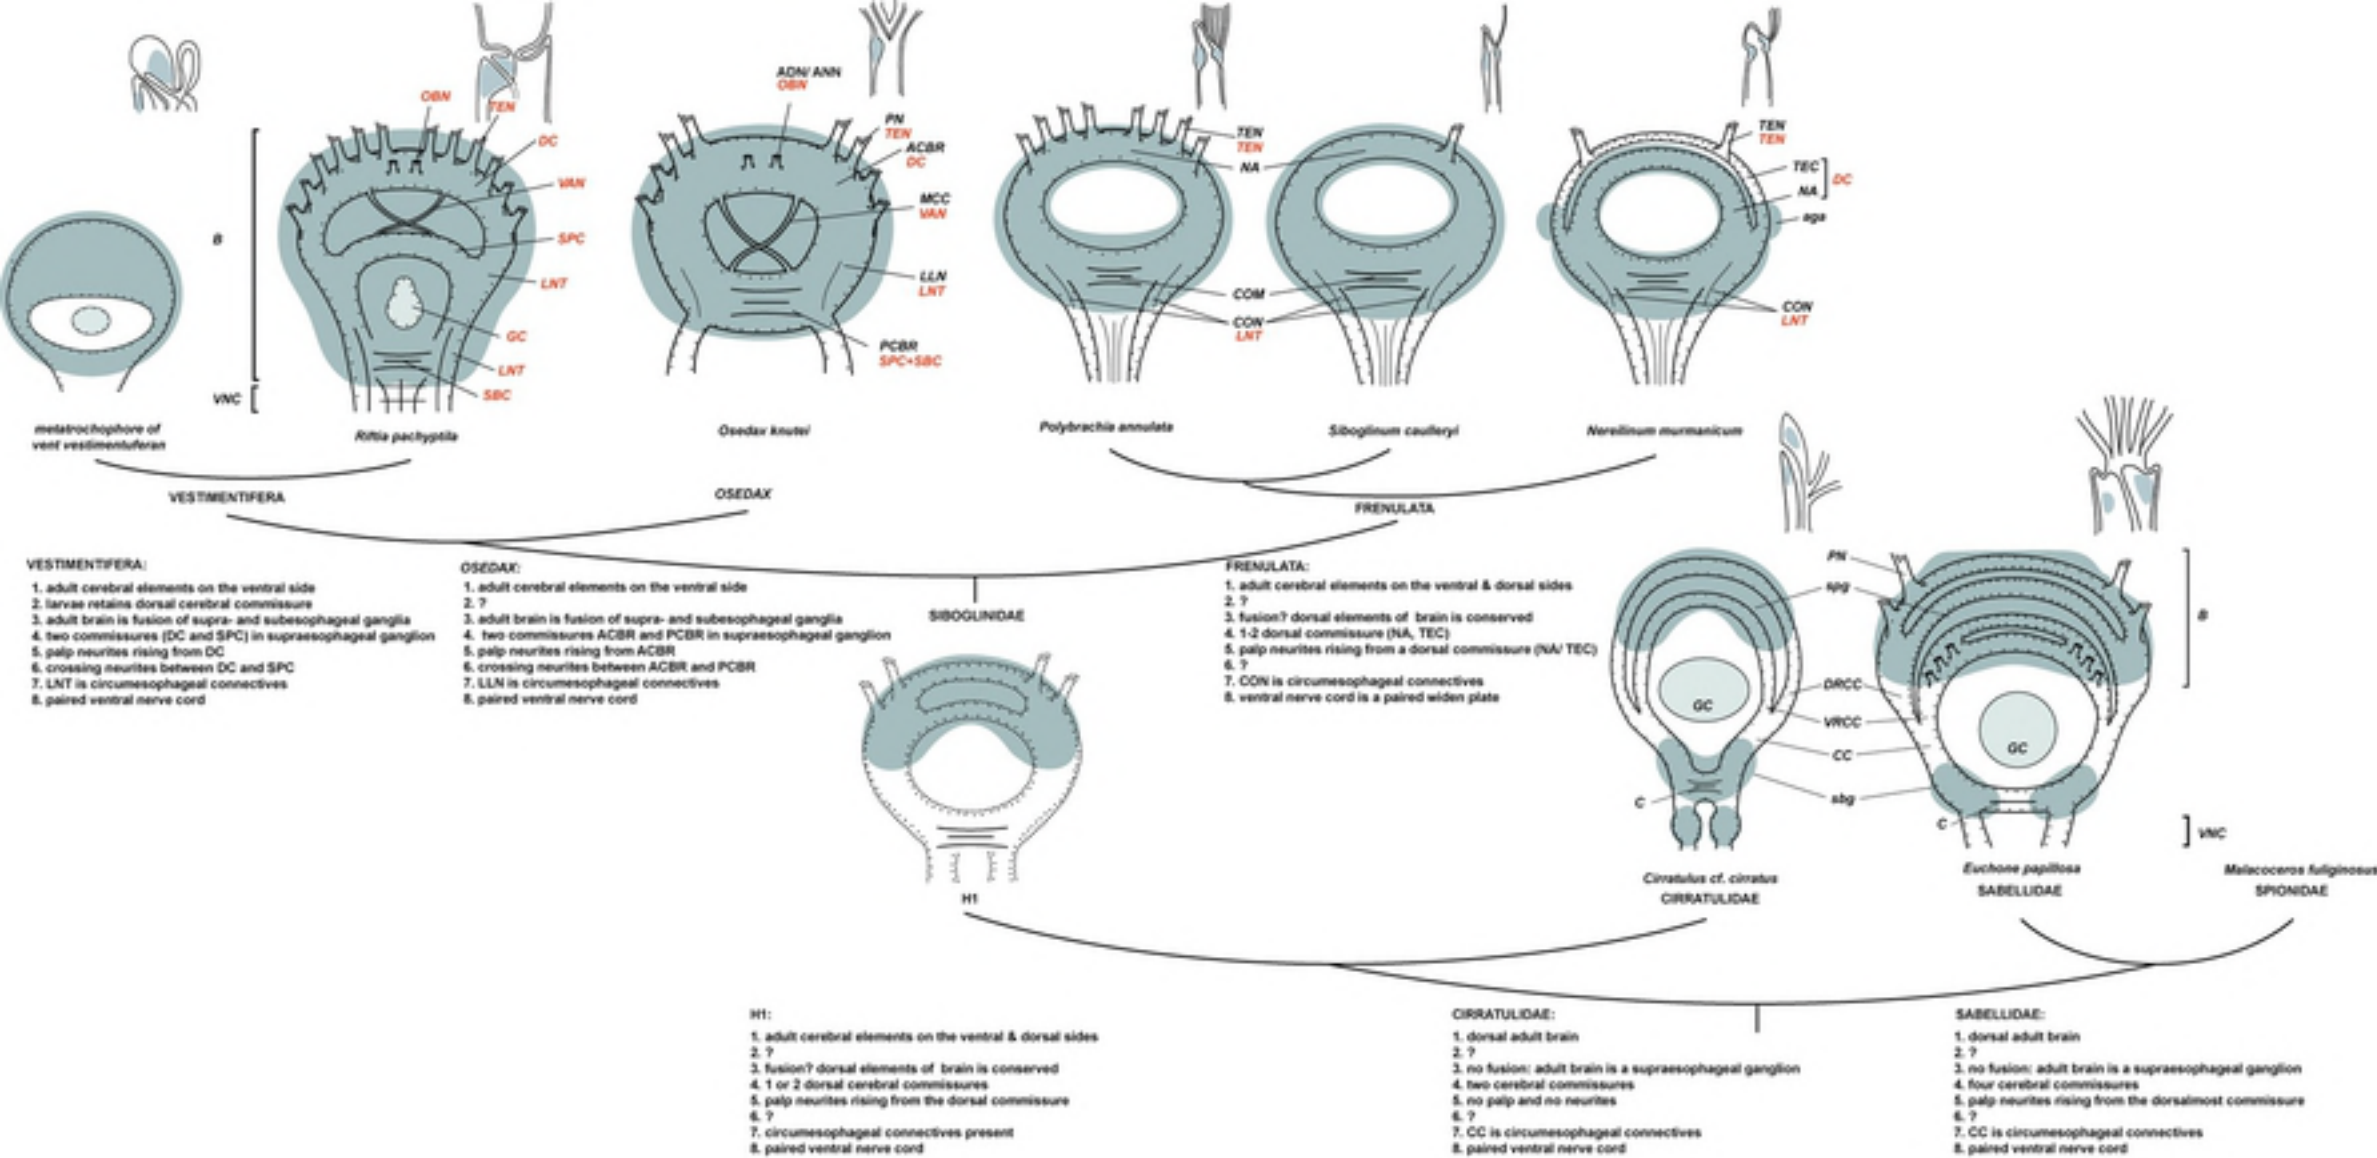

Source: https://www.biorxiv.org/content/10.1101/325431v1.full.pdf
